# Supplementary material for: Ruthenium-catalyzed asymmetric hydrogenation of aromatic and heteroaromatic ketones using cinchona alkaloid-derived NNP ligands
Source: Royal Society of Chemistry journal article supplement (doi:10.1039/d2ra02211g), 2022-01-01
Supplement: d2ra02211g1.pdf [file d2ra02211g1.pdf]

**Ruthenium-catalyzed asymmetric hydrogenation of aromatic  
and heteroaromatic ketones using cinchona alkaloids derived  
NNP ligand**

Ling Zhang<sup>†</sup>, Qian Chen<sup>†</sup>, Linlin Li, Jian Jiang, Hao Sun, Li Li, Ting Liu, Lin Zhang\* and Chun Li\*

State Key Laboratory of Functions and Applications of Medicinal Plants & School of  
Pharmaceutical Sciences Guizhou Medical University, Guiyang, 550004, People's Republic of  
China. E-mail: [scuchunli@163.com](mailto:scuchunli@163.com), [gmulinzhang@163.com](mailto:gmulinzhang@163.com)

## Table of Contents

|                                                               |            |
|---------------------------------------------------------------|------------|
| <b>1. General experimental details.....</b>                   | <b>S3</b>  |
| <b>2. Mechanistic Studies.....</b>                            | <b>S3</b>  |
| <b>3. Synthesis of L10.....</b>                               | <b>S6</b>  |
| <b>4. General procedure for asymmetric hydrogenation.....</b> | <b>S6</b>  |
| <b>5. Characterization data of compounds.....</b>             | <b>S7</b>  |
| <b>6. NMR spectra.....</b>                                    | <b>S16</b> |
| <b>7. HPLC and GC chromatograms of alcohol products.....</b>  | <b>S56</b> |
| <b>Reference.....</b>                                         | <b>S95</b> |

## 1. General experimental details

Unless otherwise mentioned, all experiments were carried out under an atmosphere of argon or using standard Schlenk techniques. Solvents were dried with standard procedures and degassed with  $N_2$ . NMR spectra were recorded on a Bruker DPX 400 or 600 spectrometer. Chemical shifts are reported in ppm and coupling constants are given in Hz. High-resolution mass spectra (HRMS) were obtained on a Bruker MicroQTOF II instrument were recorded using electrospray ionization (ESI) techniques.

**Reagents:** Unless otherwise stated, commercial reagents including Benzylidene-bis(tricyclohexylphosphine)dichlororuthenium were used without further purification.

## 2. Mechanistic Studies

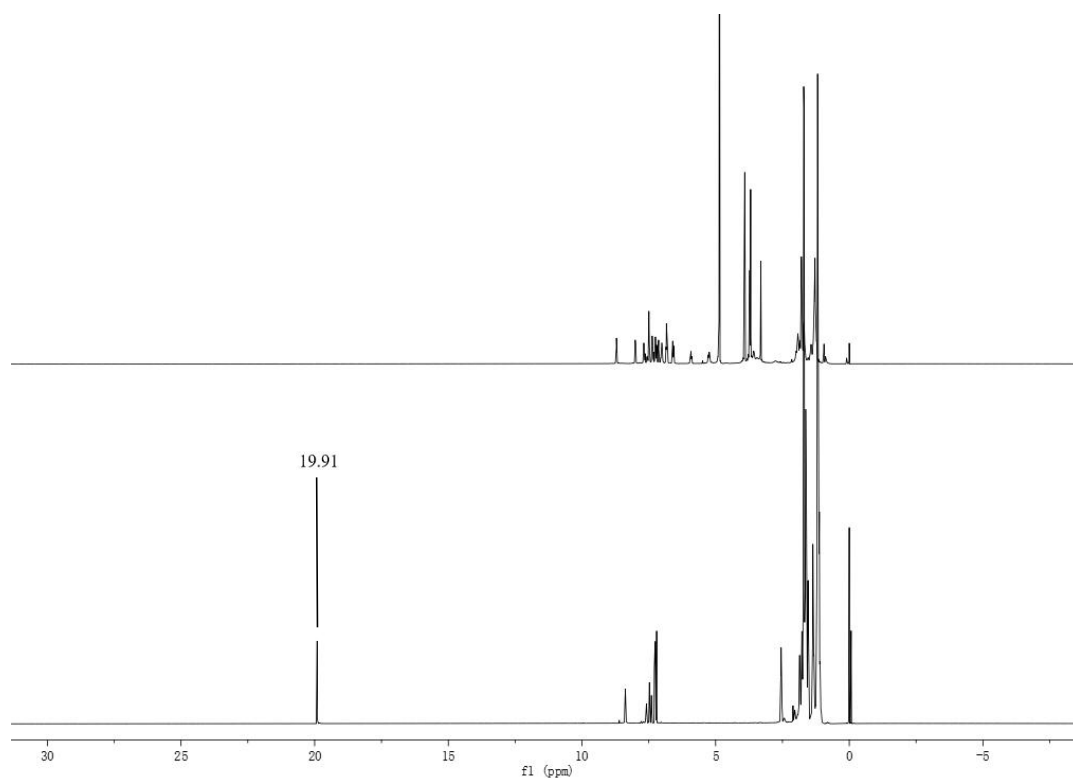

**Figure S1.** (a)  $^1H$  NMR of the mixture of catalyst precursor and **L5** ( $CD_3OD$ , 600 MHz); (b)  $^1H$  NMR of the catalyst precursor ( $CD_3OD$ , 600 MHz).

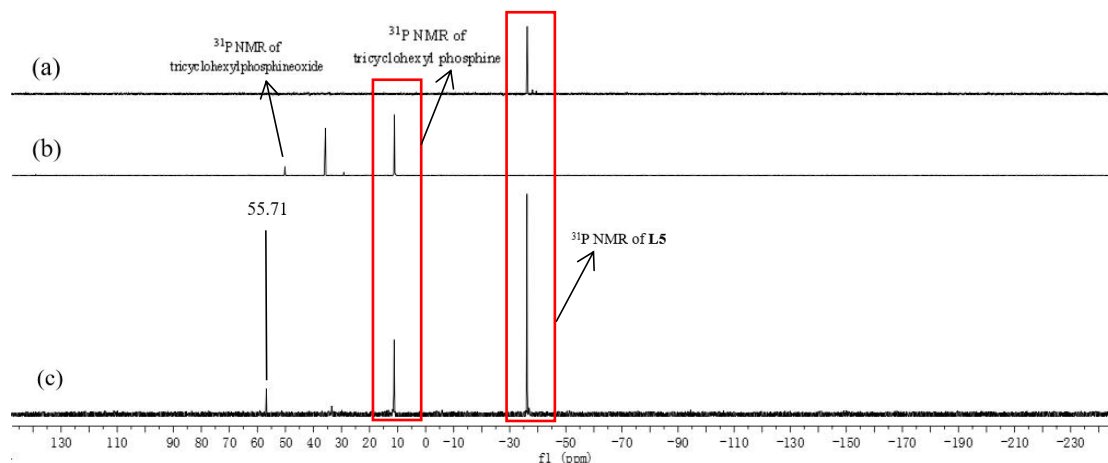

**Figure S2.** (a)  $^{31}\text{P}$  NMR of **L5** ( $\text{CD}_3\text{OD}$ , 600 MHz); (b)  $^{31}\text{P}\{\text{H}\}$  NMR of the catalyst precursor ( $\text{CD}_3\text{OD}$ , 600 MHz). (c)  $^{31}\text{P}\{\text{H}\}$  NMR of the mixture of catalyst precursor and **L5**.

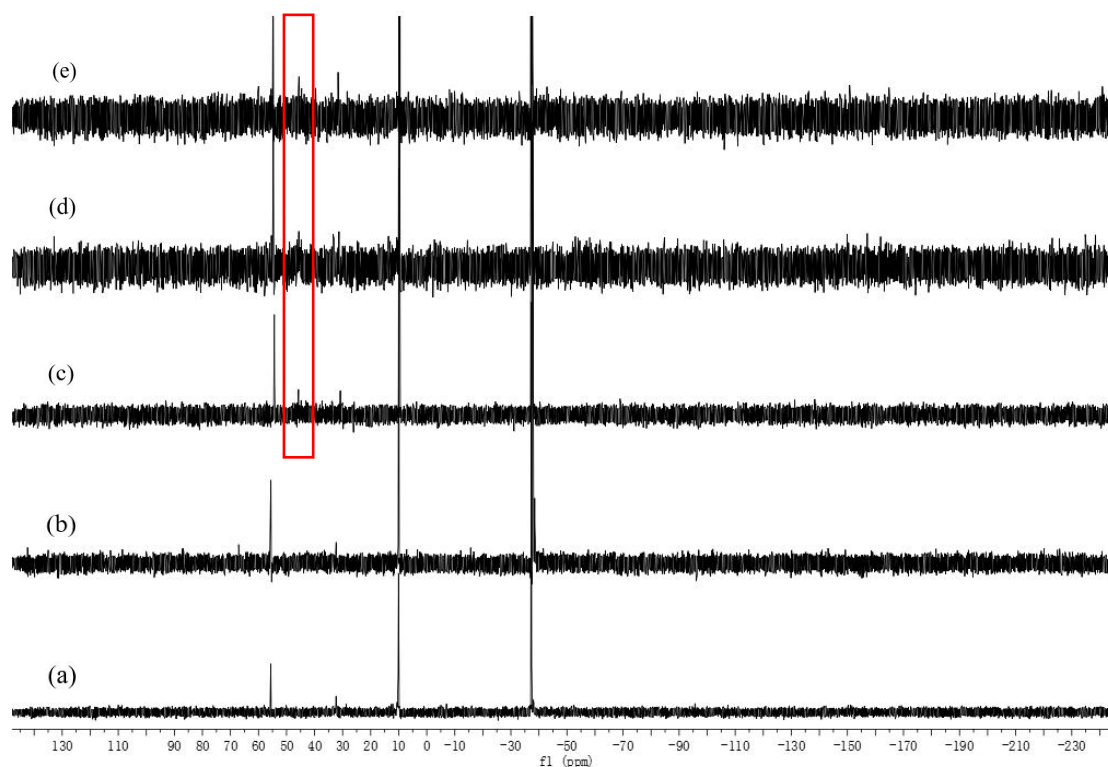

**Figure S3.**  $^{31}\text{P}\{\text{H}\}$  NMR spectra taken at 30 min to 2 h after introducing  $\text{H}_2$  to the solution. (a)  $^{31}\text{P}\{\text{H}\}$  NMR of the mixture of catalyst precursor and **L5** in  $\text{CD}_3\text{OD}$ ; (b)  $^{31}\text{P}\{\text{H}\}$  NMR of the reaction solution in  $\text{CD}_3\text{OD}$ . (Conditions: catalyst precursor (9.0 mg, 0.011 mmol), **L5** (14.5 mg, 0.022 mmol),  $\text{Ba}(\text{OH})_2$  (15.6 mg, 0.091 mmol),  $\text{H}_2$  (6.0 MPa),  $\text{CD}_3\text{OD}$  (0.6 mL),  $30^\circ\text{C}$ , 1 h.); (c)  $^{31}\text{P}\{\text{H}\}$  NMR of hydrogenation of acetophenone catalyzed by catalyst precursor and **L5** in  $\text{CD}_3\text{OD}$ . (Conditions: acetophenone (660 mg, 5.5 mmol), catalyst precursor (9.0 mg, 0.011 mmol), **L5** (14.5 mg, 0.022 mmol),  $\text{Ba}(\text{OH})_2$  (15.6 mg, 0.091 mmol),  $\text{H}_2$  (6.0 MPa),  $\text{CD}_3\text{OD}$  (0.6 mL),  $30^\circ\text{C}$ , 30 min.); (d)  $^{31}\text{P}\{\text{H}\}$  NMR of hydrogenation of acetophenone catalyzed by catalyst precursor.

precursor and **L5** in CD<sub>3</sub>OD. (Conditions: acetophenone (660 mg, 5.5 mmol), catalyst precursor (9.0 mg, 0.011 mmol), **L5** (14.5 mg, 0.022 mmol), Ba(OH)<sub>2</sub> (15.6 mg, 0.091 mmol), H<sub>2</sub> (6.0 MPa), CD<sub>3</sub>OD (0.6 mL), 30 °C, 1 h.); (e) <sup>31</sup>P{H} NMR of hydrogenation of acetophenone catalyzed by catalyst precursor and **L5** in CD<sub>3</sub>OD. (Conditions: acetophenone (660 mg, 2.2 mmol), catalyst precursor (9.0 mg, 0.011 mmol), **L5** (14.5 mg, 0.022 mmol), Ba(OH)<sub>2</sub> (15.6 mg, 0.091 mmol), H<sub>2</sub> (6.0 MPa), CD<sub>3</sub>OD (0.6 mL), 30 °C, 2 h.).

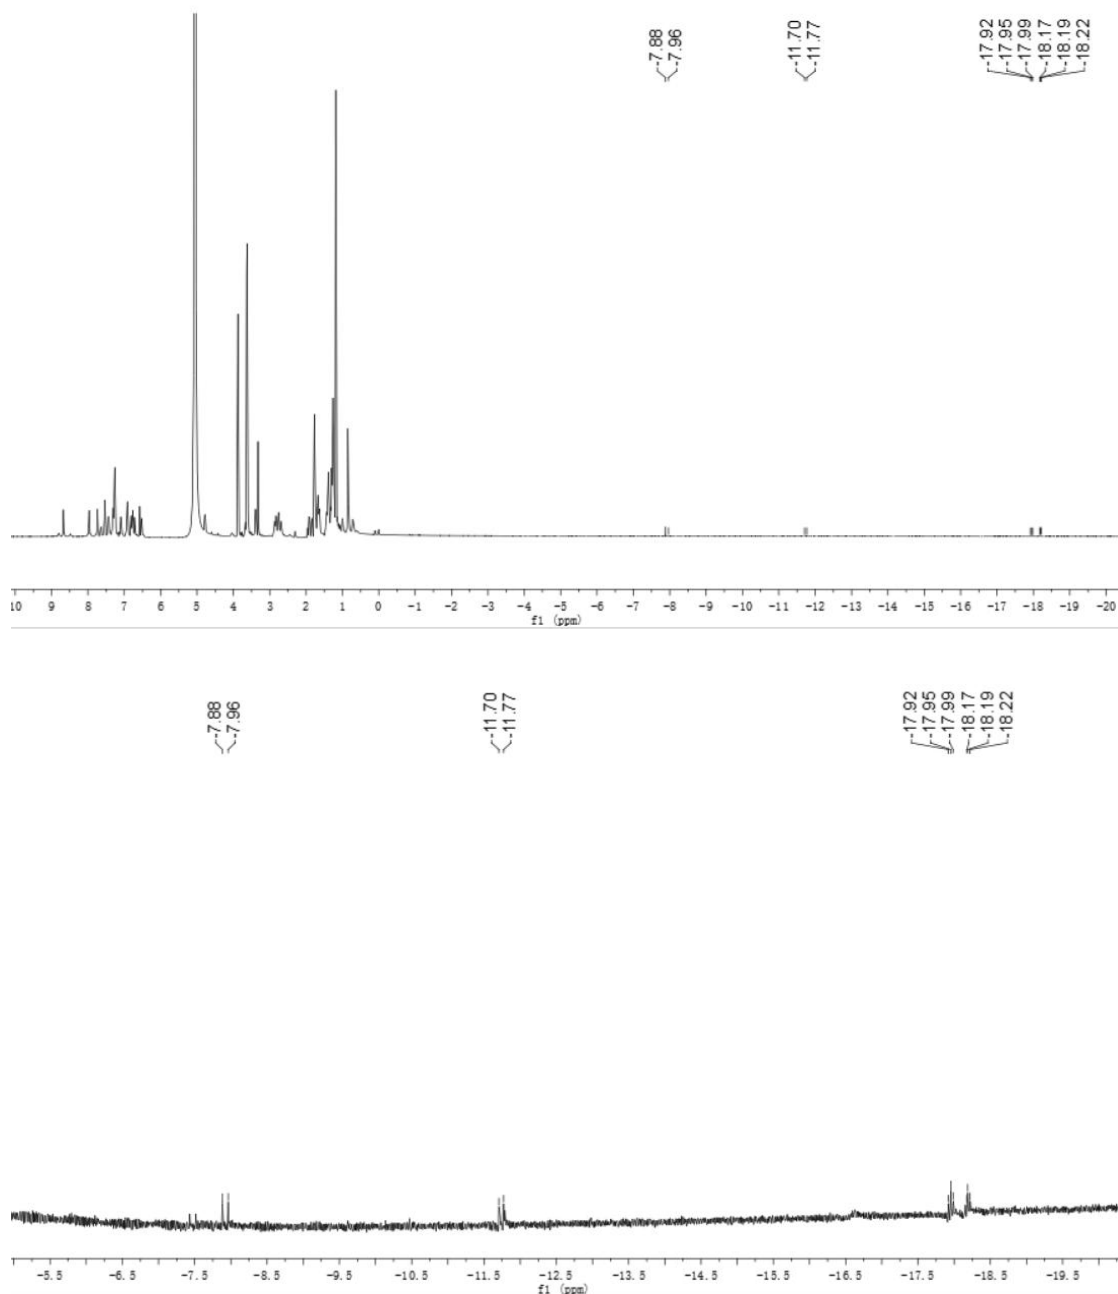

**Figure S4.** <sup>1</sup>H NMR of the reaction solution in CD<sub>3</sub>OD. (Conditions: catalyst precursor (18.0 mg, 0.022 mmol), **L5** (29.0 mg, 0.044 mmol), Ba(OH)<sub>2</sub> (15.6 mg, 0.15 mmol), H<sub>2</sub> (6.0 MPa), CD<sub>3</sub>OD (0.5 mL), 30 °C, 1 h.).

### 3. Synthesis of L10

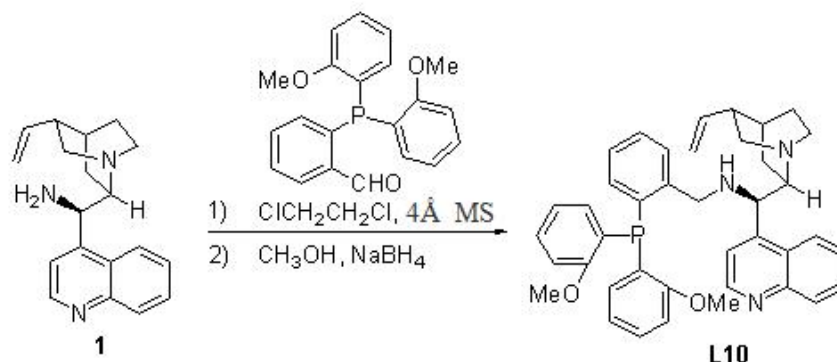

Under argon, to a solution of **1** (1.0 mmol) in 1,2-dichloro-ethane (10 mL) was added 2-diaryldiphenylphosphanyl-benzaldehyde (1.5 mmol) and 4 Å MS (3.3 g) at room temperature. After stirring for 24 h, the mixture was filtered and the filtrate was concentrated under reduced pressure to afford the solid residue. Subsequently, the solid residue was dissolved in anhydrous and oxygen free MeOH (5 ml), and  $\text{NaBH}_4$  (3.0 mmol) was added at 0 °C. The mixture was stirred at room temperature for 4h. The reaction was quenched with water (10 mL) and the aqueous layer was extracted with  $\text{CH}_2\text{Cl}_2$  (20 mL x 3). The combined organic layers were dried over anhydrous sodium sulfate and filtered. The solvent was concentrated and the crude product was further purified by column chromatography on silica gel ( $\text{CH}_2\text{Cl}_2/\text{MeOH}/\text{ammonia water}=20/1/0.1$ ) to give the corresponding ligand **L10** (white solid, 0.25 g, 37% yield).  $^1\text{H}$  NMR (600MHz,  $\text{CDCl}_3$ ):  $\delta$  = 8.89 (s, 1H), 8.22 (d,  $J$  = 3.0 Hz, 1H), 8.13 (d,  $J$  = 6.0 Hz, 1H), 7.83 (s, 1H), 7.69 - 7.72 (m, 1H), 7.53 - 7.55 (m, 1H), 7.29 - 7.34 (m, 2H), 7.19 - 7.24 (m, 2H), 7.07 - 7.09 (m, 1H), 6.85 - 6.87 (m, 1H), 6.80 - 6.83 (m, 1H), 6.72 - 6.75 (m, 1H), 6.66 (s, 1H), 6.59 (s, 1H), 5.82 - 5.88 (s, 1H), 5.03 - 5.10 (s, 2H), 4.68 (d,  $J$  = 3.0 Hz, 1H), 3.98 - 4.07 (m, 1H), 3.70 (s, 3H), 3.64 (s, 3H), 3.37 (d,  $J$  = 6.0 Hz, 3H), 2.87 (s, 1H), 2.71 (s, 2H), 2.16 (s, 1H), 1.50 (s, 1H), 1.42 (d,  $J$  = 3.0 Hz, 2H), 1.26 - 1.30 (m, 2H), 1.12 - 1.15 (m, 1H), 0.84 - 0.89 (m, 1H), 0.70 (s, 1H).  $^{13}\text{C}\{^1\text{H}\}$  NMR (150MHz,  $\text{CDCl}_3$ ):  $\delta$  = 161.12, 150.61, 149.05, 148.19, 140.88, 134.98, 133.90, 133.68, 130.29, 129.91, 128.99, 128.77, 127.00, 126.12, 125.00, 123.00, 120.97, 120.83, 119.82, 114.31, 110.07, 62.46, 57.28, 55.59, 50.31, 49.14, 47.19, 43.44, 39.75, 29.70, 27.66, 26.67, 24.50.  $^{31}\text{P}\{^1\text{H}\}$  NMR (303MHz,  $\text{CDCl}_3$ ):  $\delta$  = -38.31. HRMS (ESI) calcd. for  $\text{C}_{40}\text{H}_{42}\text{N}_3\text{O}_2\text{P}$   $[\text{M}+\text{H}]^+$ : 628.3087, found: 628.3101.

### 4. General procedure for asymmetric hydrogenation

All reagents were of analytical grade and used as-received without further purification. The purity of hydrogen was over 99.99%. Required amount of Ruthenium precursor (1.41 mg, 0.00171 mmol), acetophenone (412 mg, 3.43 mmol), **L5** (2.25 mg, 0.00343 mmol),  $\text{Ba}(\text{OH})_2$  (51.6 mg, 0.3 mmol) and MeOH (2 mL) were added to a 25 mL stainless autoclave and purged by three cycles of pressurization/venting with  $\text{H}_2$ . The required  $\text{H}_2$  pressure (6.0 MPa) was then installed and the autoclave was warmed to the indicated temperature. The autoclave was cooled down after the indicated reaction time and the pressure was slowly released. The product was purified by silica gel chromatography using petroleum ether/ethylacetate (10/1) as eluent. The enantioselectivity values were analyzed by GC-9790 with a Beta-DEX<sup>TM</sup>120 capillary column (df = 0.25 $\mu\text{m}$ , 0.25 mm i.d. x 30 m) and LC-16 with

Chirasil OD-H column (25 cm × 4.6 mm), Chirasil IA column (25 cm × 4.6 mm) and Chirasil IB column (25 cm × 4.6 mm). The ee values of chiral alcohols were calculated from the equations enantioselectivity values (ee, %) = | R - S | / |R + S|. Optical rotation was measured on the Rudolph Autopol I with  $[\alpha]_{\text{D}}^{25}$  values reported in degrees at 25 °C ; concentration (c) is in g/100ml.

## 5. Characterization data of compounds

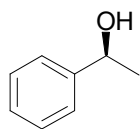

**(S)-1-Phenyl-ethanol (P1):** Colorless oil, purified by silica gel chromatography

(petroleum ether/ethylacetate = 10:1), 99 % yield, 415 mg, 98.8% ee, S isomer;  $[\alpha]_{\text{D}}^{25} = -56.4$  (c = 1.00 in  $\text{CHCl}_3$ ) (lit.1  $[\alpha]_{\text{D}}^{20} = -59.7$  (c = 1.0,  $\text{CHCl}_3$ ));  $^1\text{H NMR}$  (400 MHz,  $\text{DMSO-}d_6$ )  $\delta$  7.29-7.35(m, 4H), 7.19-7.23(m, 1H), 5.17(d,  $J = 2.0$  Hz, 1H), 4.68-4.74(m, 1H), 1.32 (d,  $J = 4.0$  Hz, 3H).  $^{13}\text{C}\{\text{H}\}$  NMR (100 MHz,  $\text{DMSO-}d_6$ )  $\delta$  147.81, 128.44, 126.97, 125.74, 68.55, 26.43.

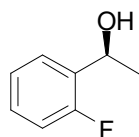

**(S)-1-(2-Fluoro-phenyl)-ethanol (P2):** Colorless oil, purified by silica gel

chromatography (petroleum ether/ethylacetate = 10:1), 93% yield, 447 mg, 99.2% ee, S isomer;  $[\alpha]_{\text{D}}^{25} = -44.7$  (c = 1.00 in  $\text{CHCl}_3$ ) (lit.2  $[\alpha]_{\text{D}}^{25} = -43.9$  (c = 1.0,  $\text{CHCl}_3$ ));  $^1\text{H NMR}$  (400 MHz,  $\text{DMSO-}d_6$ )  $\delta$  7.50-7.54(m, 1H), 7.08-7.28(m, 3H), 5.32(d,  $J = 2.0$  Hz, 1H), 4.96-5.01 (m, 1H), 1.33(d,  $J = 4.0$  Hz, 3H).  $^{13}\text{C}\{\text{H}\}$  NMR (100 MHz,  $\text{DMSO-}d_6$ )  $\delta$  160.51, 158.10, 134.35, 128.76, 127.42, 124.79, 115.40, 115.59, 62.47, 25.18.

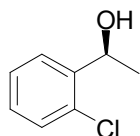

**(S)-1-(2-Chlorophenyl)-ethanol (P3):** Colorless oil, purified by silica gel

chromatography (petroleum ether/ethylacetate = 10:1), 99% yield, 530 mg, 99.7% ee, S isomer;  $[\alpha]_{\text{D}}^{25} = -51.1$  (c = 1.00 in  $\text{CHCl}_3$ ), (lit.2  $[\alpha]_{\text{D}}^{25} = -56.6$  (c = 1.0,  $\text{CHCl}_3$ ));  $^1\text{H NMR}$  (400 MHz,  $\text{DMSO-}d_6$ )  $\delta$  7.60-7.63(m, 1H), 7.34-7.37(m, 2H), 7.23-7.27(m, 1H), 5.40(d,  $J = 2.0$  Hz, 1H), 4.99-5.05(m, 1H), 1.31(d,  $J = 2.0$  Hz, 3H).  $^{13}\text{C}\{\text{H}\}$  NMR (100 MHz,  $\text{DMSO-}d_6$ )  $\delta$  144.97, 130.69, 129.32, 128.67, 127.78, 127.34, 65.43, 24.77.

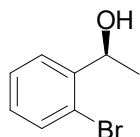

**(S)-1-(2-Bromophenyl)-ethanol (P4):** Colorless oil, purified by silica gel

chromatography (petroleum ether/ethylacetate = 10:1), 99% yield, 679 mg, 99.6% ee, S isomer;  $[\alpha]_{\text{D}}^{25} = -47.3$  (c = 1.00 in  $\text{CHCl}_3$ ), (lit.2  $[\alpha]_{\text{D}}^{25} = -48.3$  (c = 1.0,  $\text{CHCl}_3$ ));  $^1\text{H NMR}$  (400 MHz,  $\text{DMSO-}d_6$ )  $\delta$  7.59-7.62(m, 1H), 7.52-7.54(m, 1H), 7.38-7.41(m, 1H), 7.15-7.19(m, 1H), 5.43(d,  $J = 2.0$  Hz, 1H), 4.93-4.98(m, 1H), 1.30(d,  $J = 2.0$  Hz, 3H).  $^{13}\text{C}\{\text{H}\}$  NMR (100 MHz,  $\text{DMSO-}d_6$ )  $\delta$  146.50, 132.55, 129.08, 128.36, 127.61, 121.11, 67.79, 24.86.

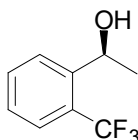

**(S)-1-(2-Trifluoromethyl-phenyl)-ethanol (P5):** Colorless oil, purified by silica gel chromatography (petroleum ether/ethylacetate = 10:1), 49 % yield, 32 mg, 99.7% ee, S isomer;  $[a]_{\text{D}}^{25} = -48.5$  ( $c = 1.00$  in  $\text{CHCl}_3$ ), (lit.2  $[a]_{\text{D}}^{25} = -46.0$  ( $c = 1.0$ ,  $\text{CHCl}_3$ ));  $^1\text{H NMR}$  (400 MHz,  $\text{CDCl}_3$ )  $\delta$  7.83(d,  $J = 4.0$  Hz, 1H), 7.57-7.62(m, 2H), 7.35-7.38(m, 1H), 5.31-5.36(m, 1H), 2.02(s, 1H), 1.49(d,  $J = 4.0$  Hz, 3H).  $^{13}\text{C}\{\text{H}\}$  NMR (100 MHz,  $\text{CDCl}_3$ )  $\delta$  144.01, 131.37, 126.33, 126.03, 124.37, 124.32, 124.26, 124.16, 122.00, 64.68, 64.66, 24.41.

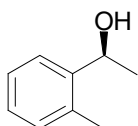

**(S)-1-o-Tolyl-ethanol (P6):** Colorless oil, purified by silica gel chromatography (petroleum ether/ethylacetate = 10:1), 77% yield, 36 mg, 99.9% ee, S isomer;  $[a]_{\text{D}}^{25} = -59.9$  ( $c = 1.00$  in  $\text{CHCl}_3$ ), (lit.2  $[a]_{\text{D}}^{25} = -62.6$  ( $c = 1.0$ ,  $\text{CHCl}_3$ ));  $^1\text{H NMR}$  (400 MHz,  $\text{CDCl}_3$ )  $\delta$  7.51 (d,  $J = 4.0$  Hz, 1H), 7.23(d,  $J = 4.0$  Hz, 1H), 7.12-7.19(m, 2H), 5.10-5.14(m, 1H), 2.34(s, 3H), 1.85(s, 1H), 1.47(d,  $J = 2.0$  Hz, 3H).  $^{13}\text{C}\{\text{H}\}$  NMR (100 MHz,  $\text{CDCl}_3$ )  $\delta$  142.79, 133.20, 129.35, 126.15, 125.35, 123.43, 65.80, 22.90, 17.88.

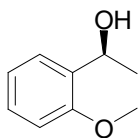

**(S)-1-(2-Methoxy-phenyl)-ethanol (P7):** Colorless oil, purified by silica gel chromatography (petroleum ether/ethylacetate = 10:1), 48% yield, 25 mg, 99.9% ee, S isomer;  $[a]_{\text{D}}^{25} = -24.5$  ( $c = 1.00$  in  $\text{CHCl}_3$ ), (lit.2  $[a]_{\text{D}}^{25} = -26.5$  ( $c = 1.0$ ,  $\text{CHCl}_3$ ));  $^1\text{H NMR}$  (400 MHz,  $\text{DMSO}-d_6$ )  $\delta$  7.43(d,  $J = 4.0$  Hz, 1H), 7.17-7.21(m, 1H), 6.91-6.95(m, 2H), 4.98-5.01 (m, 2H), 3.77(s, 3H), 1.25(d,  $J = 4.0$  Hz, 3H).  $^{13}\text{C}\{\text{H}\}$  NMR (100 MHz,  $\text{DMSO}-d_6$ )  $\delta$  155.71, 135.86, 127.87, 125.80, 120.70, 110.78, 62.84, 55.67, 25.13.

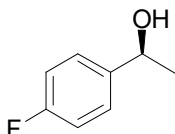

**(S)-1-1-(4-Fluoro-phenyl)-ethanol (P8):** Colorless oil, purified by silica gel chromatography (petroleum ether/ethylacetate = 10:1), 99% yield, 48 mg, 99.4% ee, S isomer;  $[a]_{\text{D}}^{25} = -37.1$  ( $c = 1.00$  in  $\text{CHCl}_3$ ), (lit.2  $[a]_{\text{D}}^{25} = -42.4$  ( $c = 1.0$ ,  $\text{CHCl}_3$ ));  $^1\text{H NMR}$  (600 MHz,  $\text{DMSO}-d_6$ )  $\delta$  7.36-7.38(m, 2H), 7.11-7.14(m, 2H), 5.20(d,  $J = 3.0$  Hz, 1H), 4.70-4.74(m, 1H), 1.31(d,  $J = 6.0$  Hz, 3H).  $^{13}\text{C}\{\text{H}\}$  NMR (150 MHz,  $\text{DMSO}-d_6$ )  $\delta$  162.23, 160.63, 143.99, 127.64, 127.59, 115.14, 115.00, 67.91, 26.43.

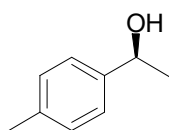

**(S)-1-1-p-Tolyl-ethanol (P9):** Colorless oil, purified by silica gel chromatography (petroleum ether/ethylacetate = 20:1), 99% yield, 46 mg, 98.6% ee, S



isomer;  $[a]_D^{25} = -46.3$  ( $c = 1.00$  in  $\text{CHCl}_3$ ), (lit.3  $[a]_D^{20} = -45.9$  ( $c = 1.11$ ,  $\text{CHCl}_3$ ));  $^1\text{H NMR}$  (600 MHz,  $\text{DMSO-}d_6$ )  $\delta$  7.23(d,  $J = 3.0$  Hz, 2H), 7.12(d,  $J = 3.0$  Hz, 2H), 5.07(d,  $J = 3.0$  Hz, 1H), 4.66-4.70(m, 1H), 2.28(s, 3H), 1.31(d,  $J = 3.0$  Hz, 3H).  $^{13}\text{C}\{\text{H}\}$  NMR (150 MHz,  $\text{DMSO-}d_6$ )  $\delta$  144.87, 135.86, 128.97, 125.69, 68.37, 26.46, 21.13.

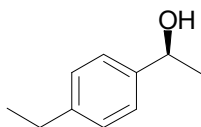

**(S)-1-(4-ethylphenyl)ethan-1-ol (P10):** Colorless oil, purified by silica gel

chromatography (petroleum ether/ethylacetate = 10:1), 84 % yield, 22 mg, 99.6% ee, S isomer;  $[a]_D^{25} = -39.9$  ( $c = 1.00$  in  $\text{CHCl}_3$ ), (lit.2  $[a]_D^{25} = -44.9$  ( $c = 1.0$ ,  $\text{CHCl}_3$ ));  $^1\text{H NMR}$  (600 MHz,  $\text{DMSO-}d_6$ )  $\delta$  7.25(d,  $J = 3.0$  Hz, 2H), 7.14(d,  $J = 6.0$  Hz, 2H), 5.07(d,  $J = 3.0$  Hz, 1H), 4.66-4.70(m, 1H), 2.56-2.59(m, 2H), 1.31(d,  $J = 3.0$  Hz, 3H), 1.15-1.18(m, 3H).  $^{13}\text{C}\{\text{H}\}$  NMR (150 MHz,  $\text{DMSO-}d_6$ )  $\delta$  145.13, 142.36, 127.78, 125.76, 68.40, 28.32, 26.41, 16.24.

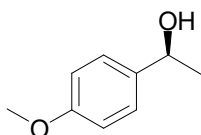

**(S)-1-(4-Methoxy-phenyl)-ethanol (P11):** Colorless oil, purified by silica gel

chromatography (petroleum ether/ethylacetate = 10:1), 92% yield, 48 mg, 99.6% ee, S isomer;  $[a]_D^{25} = -39.0$  ( $c = 1.00$  in  $\text{CHCl}_3$ ), (lit.1  $[a]_D^{20} = -41.7$  ( $c = 1.0$ ,  $\text{CHCl}_3$ ));  $^1\text{H NMR}$  (400 MHz,  $\text{DMSO-}d_6$ )  $\delta$  7.25(d,  $J = 6.0$  Hz, 2H), 6.86(d,  $J = 4.0$  Hz, 2H), 5.06(d,  $J = 2.0$  Hz, 1H), 4.65-4.67(m, 1H), 3.72(s, 3H), 1.29(d,  $J = 4.0$  Hz, 3H).  $^{13}\text{C}\{\text{H}\}$  NMR (100 MHz,  $\text{DMSO-}d_6$ )  $\delta$  158.42, 139.84, 126.90, 113.80, 68.11, 55.46, 26.41.

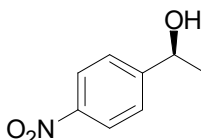

**(S)-1-(4-nitrophenyl)ethan-1-ol (P12):** Colorless oil, purified by silica gel

chromatography (petroleum ether/ethylacetate = 10:1), 99% yield, 14 mg, 88.5% ee, S isomer;  $[a]_D^{25} = -32.3$  ( $c = 1.00$  in  $\text{CHCl}_3$ ), (lit.4  $[a]_D^{25} = -22.2$  ( $c = 0.8$ ,  $\text{CHCl}_3$ ));  $^1\text{H NMR}$  (600 MHz,  $\text{DMSO-}d_6$ )  $\delta$  8.20 (d,  $J = 3.0$  Hz, 2H), 7.63 (d,  $J = 6$  Hz, 2H), 5.52 (d,  $J = 3.0$  Hz, 1H), 4.85 - 4.89 (m, 1H), 1.36 (d,  $J = 3.0$  Hz, 3H).  $^{13}\text{C}\{\text{H}\}$  (100 MHz,  $\text{DMSO-}d_6$ )  $\delta$  155.78, 146.71, 126.93, 123.76, 67.89, 26.11.

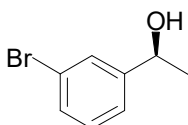

**(S)-1-(3-bromophenyl)ethan-1-ol (P13):** Colorless oil, purified by silica gel

chromatography (petroleum ether/ethylacetate = 10:1), 99% yield, 68 mg, 97.2% ee, S isomer;  $[a]_D^{25} = -27.4$  ( $c = 1.00$  in  $\text{CHCl}_3$ ), (lit.2  $[a]_D^{25} = -30.2$  ( $c = 1.0$ ,  $\text{CHCl}_3$ ));  $^1\text{H NMR}$  (600 MHz,  $\text{DMSO-}d_6$ )  $\delta$  7.53(s, 1H), 7.41(d,  $J = 3.0$  Hz, 1H), 7.34(d,  $J = 3.0$  Hz, 1H), 7.27-7.29(m, 1H), 5.31(d,  $J = 3.0$  Hz, 1H), 4.70-4.74(m, 1H), 1.32(d,  $J = 3.0$  Hz, 3H).  $^{13}\text{C}\{\text{H}\}$  NMR (150 MHz,  $\text{DMSO-}d_6$ )  $\delta$  150.77, 130.72, 129.76, 128.52, 124.87, 121.95, 67.90, 26.26.

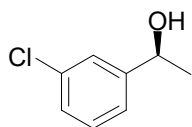

**(S)-1-(3-chlorophenyl)ethan-1-ol (P14):** Colorless oil, purified by silica gel chromatography (petroleum ether/ethylacetate = 10:1), 97% yield, 52 mg, 97.3% ee, S isomer;  $[a]_D^{25} = -35.2$  ( $c = 1.00$  in  $\text{CHCl}_3$ ), (lit.2  $[a]_D^{25} = -37.2$  ( $c = 1.0$ ,  $\text{CHCl}_3$ ));  $^1\text{H NMR}$  (600 MHz,  $\text{DMSO-}d_6$ )  $\delta$  7.40(s, 1H), 7.33-7.35 (m, 1H), 7.26-7.30(m, 2H), 5.30(d,  $J = 1.5$  Hz, 1H), 4.71-4.75(m, 1H), 1.32(d,  $J = 6.0$  Hz, 3H).  $^{13}\text{C}\{\text{H}\}$  NMR (150 MHz,  $\text{DMSO-}d_6$ )  $\delta$  150.52, 133.27, 130.37, 126.85, 125.63, 124.47, 67.95, 26.24.

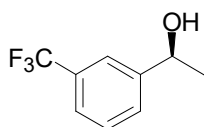

**(S)-1-(3-(trifluoromethyl)phenyl)ethan-1-ol (P15):** Colorless oil, purified by silica gel chromatography (petroleum ether/ethylacetate = 10:1), 99% yield, 65 mg, 98.4% ee, S isomer;  $[a]_D^{25} = -29.7$  ( $c = 1.00$  in  $\text{CHCl}_3$ ), (lit.2  $[a]_D^{25} = -33.1$  ( $c = 1.0$ ,  $\text{CHCl}_3$ ));  $^1\text{H NMR}$  (600 MHz,  $\text{DMSO-}d_6$ )  $\delta$  7.69(s, 1H), 7.65(d,  $J = 3.0$  Hz, 1H), 7.54-7.59(m, 2H), 5.39(d,  $J = 3.0$  Hz, 1H), 4.81-4.85(m, 1H), 1.35(d,  $J = 3.0$  Hz, 3H).  $^{13}\text{C}\{\text{H}\}$  NMR (150 MHz,  $\text{DMSO-}d_6$ )  $\delta$  149.31, 129.98, 129.52, 125.77, 123.97, 123.70, 122.15, 67.91, 26.26.

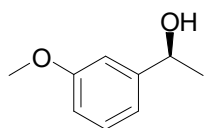

**(S)-1-(3-methoxyphenyl)ethan-1-ol (P16):** Colorless oil, purified by silica gel chromatography (petroleum ether/ethylacetate = 10:1), 99% yield, 52 mg, 99.6% ee, S isomer;  $[a]_D^{25} = -35.1$  ( $c = 1.00$  in  $\text{CHCl}_3$ ), (lit.2  $[a]_D^{25} = -39.8$  ( $c = 1.0$ ,  $\text{CHCl}_3$ ));  $^1\text{H NMR}$  (600 MHz,  $\text{DMSO-}d_6$ )  $\delta$  7.21-7.23(m, 1H), 6.91 (d,  $J = 6.0$  Hz, 2H), 7.68(d,  $J = 6.0$  Hz, 1H), 5.15(d,  $J = 3.0$  Hz, 1H), 4.68-4.71(m, 1H), 3.75(s, 3H), 1.32(d,  $J = 3.0$  Hz, 3H).  $^{13}\text{C}\{\text{H}\}$  NMR (150 MHz,  $\text{DMSO-}d_6$ )  $\delta$  159.62, 149.65, 129.47, 117.99, 112.33, 111.30, 68.48, 55.35, 26.42.

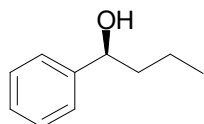

**(S)-1-Phenyl-butan-1-ol (P17):** Colorless oil, purified by silica gel chromatography (petroleum ether/ethylacetate =20:1), 99% yield, 51 mg, 97.6% ee, S isomer;  $[a]_D^{25} = -32.7$  ( $c = 1.00$  in  $\text{CHCl}_3$ ) (lit.2  $[a]_D^{25} = -39.8$  ( $c = 1.0$ ,  $\text{CHCl}_3$ ));  $^1\text{NMR}$  (400 MHz,  $\text{DMSO-}d_6$ )  $\delta$  7.31(d,  $J = 2.0$  Hz, 4H), 7.18-7.24(m, 1H), 5.12(d,  $J = 2.0$  Hz, 1H), 4.48-4.53(m, 1H), 1.47-1.52(m, 2H), 1.20-1.37(m, 2H), 0.84-0.87(m, 3H).  $^{13}\text{C}\{\text{H}\}$  NMR (100 MHz,  $\text{DMSO-}d_6$ )  $\delta$  146.90, 128.37, 127.00, 126.23, 72.50, 42.03, 19.00, 14.36.

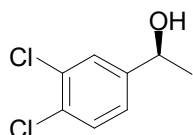

**(S)-1-(3,4-dichlorophenyl)ethan-1-ol (P18):** Light yellow oil, purified by silica gel chromatography (petroleum ether/ethylacetate = 10:1), 99% yield, 65 mg, 94.7% ee, S isomer;  $[\alpha]_{\text{D}}^{25} = -35.4$  ( $c = 1.00$  in  $\text{CHCl}_3$ ), (lit.5  $[\alpha]_{\text{D}}^{25} = -38.19$  ( $c = 1.04$ ,  $\text{CHCl}_3$ ));  $^1\text{H NMR}$  (600 MHz,  $\text{DMSO-}d_6$ )  $\delta$  7.55-7.57 (m, 2H), 7.33 (d,  $J = 6.0$  Hz, 1H), 5.39 (d,  $J = 3.0$  Hz, 1H), 4.75-4.71 (m, 1H), 1.32 (d,  $J = 3.0$  Hz, 3H).  $^{13}\text{C}\{\text{H}\}$  NMR (150 MHz,  $\text{DMSO-}d_6$ )  $\delta$  149.12, 131.15, 130.70, 129.30, 127.81, 126.19, 67.40, 26.07.

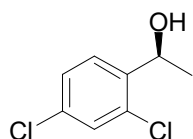

**(S)-1-(2,4-dichlorophenyl)ethan-1-ol (P19):** Colorless oil, purified by silica gel chromatography (petroleum ether/ethylacetate =20:1), 99% yield, 65 mg, 97.4% ee, S isomer;  $[\alpha]_{\text{D}}^{25} = -46.7$  ( $c = 1.00$  in  $\text{CHCl}_3$ ), (lit.2  $[\alpha]_{\text{D}}^{25} = -55.7$  ( $c = 1.0$ ,  $\text{CHCl}_3$ ));  $^1\text{H NMR}$  (600 MHz,  $\text{DMSO-}d_6$ )  $\delta$  7.62(d,  $J = 6.0$  Hz, 1H), 7.52(d,  $J = 3.0$  Hz, 1H), 7.43-7.45(m, 1H), 5.47(d,  $J = 3.0$  Hz, 1H), 4.97-5.01(m, 1H), 1.30(d,  $J = 3.0$  Hz, 3H).  $^{13}\text{C}\{\text{H}\}$  NMR (150 MHz,  $\text{DMSO-}d_6$ )  $\delta$  144.17, 132.20, 131.55, 128.84, 128.70, 127.98, 65.15, 24.56.

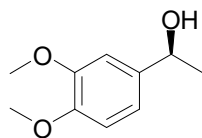

**(S)-1-(3,4-dimethoxyphenyl)ethan-1-ol (P20):** Colorless oil, purified by silica gel chromatography (petroleum ether/ethylacetate =2:1), 87% yield, 54 mg, 97.6% ee, S isomer;  $[\alpha]_{\text{D}}^{25} = -41.2$  ( $c = 1.00$  in  $\text{CHCl}_3$ ), (lit.2  $[\alpha]_{\text{D}}^{25} = -44.3$  ( $c = 1.0$ ,  $\text{CHCl}_3$ ));  $^1\text{H NMR}$  (600 MHz,  $\text{DMSO-}d_6$ )  $\delta$  6.95(s, 1H), 6.83-6.88(m, 2H), 5.05(d,  $J = 3.0$  Hz, 1H), 4.64-4.68(m, 1H), 3.74(d,  $J = 6.0$  Hz, 3H), 1.31(d,  $J = 3.0$  Hz, 1H).  $^{13}\text{C}\{\text{H}\}$  NMR (150 MHz,  $\text{DMSO-}d_6$ )  $\delta$  148.97, 147.94, 140.53, 117.65, 111.98, 109.78, 68.34, 56.03, 26.45.

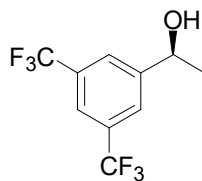

**(S)-1-(3,5-Bis-trifluoromethyl-phenyl)-ethanol (P21):** White solid, mp: 54-55°C, purified by silica gel chromatography (petroleum ether/ethylacetate =10:1), 99% yield, 88 mg, 98.2% ee, S isomer;  $[\alpha]_{\text{D}}^{25} = -22.1$  ( $c = 1.00$  in  $\text{CHCl}_3$ ), (lit.2  $[\alpha]_{\text{D}}^{25} = -20.4$  ( $c = 1.0$ ,  $\text{CHCl}_3$ ));  $^1\text{H NMR}$  (600 MHz,  $\text{DMSO-}d_6$ )  $\delta$  8.04(s, 2H), 7.95(s, 2H), 5.62(d,  $J = 3.0$  Hz, 1H), 4.93-4.97(m, 1H), 1.39(d,  $J = 3.0$  Hz, 3H).  $^{13}\text{C}\{\text{H}\}$  NMR (150 MHz,  $\text{DMSO-}d_6$ )  $\delta$  130.59, 130.37, 130.16, 126.55, 124.84, 123.03, 120.70, 67.44, 26.04.

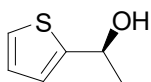

**(S)-1-(Thiophen-2-yl)ethan-1-ol (P22):** Colorless oil, purified by silica gel chromatography (petroleum ether/ethylacetate =20:1), 99% yield, 43 mg, 99.6% ee, S isomer;  $[a]_D^{25} = -30.7$  ( $c = 1.00$  in  $\text{CHCl}_3$ ), (lit.6  $[a]_D^{25} = -29.6$  ( $c = 1.0$ ,  $\text{CHCl}_3$ ));  $^1\text{H NMR}$  (400 MHz,  $\text{DMSO-}d_6$ )  $\delta$  7.35(d,  $J = 2.0$  Hz, 1H), 6.91-6.95(m, 2H), 5.50(d,  $J = 2.0$  Hz, 1H), 4.91-4.97(m, 1H), 1.41(d,  $J = 4.0$  Hz, 3H).  $^{13}\text{C}\{\text{H}\}$  NMR (100 MHz,  $\text{DMSO-}d_6$ )  $\delta$  152.40, 126.94, 124.25, 122.75, 64.86, 26.40.

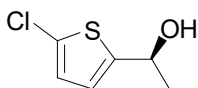

**(S)-1-(5-Chlorothiophen-2-yl)ethan-1-ol (P23):** Light yellow oil, purified by silica gel chromatography (petroleum ether/ethylacetate =20:1), 99% yield, 55 mg, 97.0% ee, S isomer;  $[a]_D^{25} = -66.8$  ( $c = 1.00$  in  $\text{CHCl}_3$ ), (lit.2  $[a]_D^{25} = -70.4$  ( $c = 1.0$ ,  $\text{CHCl}_3$ ));  $^1\text{H NMR}$  (400 MHz,  $\text{DMSO-}d_6$ )  $\delta$  6.93(d,  $J = 2.0$  Hz, 1H), 6.77(d,  $J = 2.0$  Hz, 1H), 5.68 (d,  $J = 2.0$  Hz, 1H), 4.83-4.89(m, 1H), 1.38(d,  $J = 4.0$  Hz, 3H).  $^{13}\text{C}\{\text{H}\}$  NMR (100 MHz,  $\text{DMSO-}d_6$ )  $\delta$  152.01, 126.68, 126.30, 122.30, 65.02, 25.91.

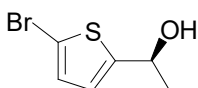

**(S)-1-(5-Bromothiophen-2-yl)ethan-1-ol (P24):** Colorless oil, purified by silica gel chromatography (petroleum ether/ethylacetate =10:1), 99% yield, 70 mg, 97.2% ee, S isomer;  $[a]_D^{25} = -66.1$  ( $c = 1.00$  in  $\text{CHCl}_3$ ), (lit.2  $[a]_D^{25} = -64.8$  ( $c = 1.0$ ,  $\text{CHCl}_3$ ));  $^1\text{H NMR}$  (400 MHz,  $\text{DMSO-}d_6$ )  $\delta$  7.03(d,  $J = 2.0$  Hz, 1H), 6.75(d,  $J = 2.0$  Hz, 1H), 5.67(d,  $J = 4.0$  Hz, 1H), 4.85-4.90(m, 1H), 1.38(d,  $J = 4.0$  Hz, 3H).  $^{13}\text{C}\{\text{H}\}$  NMR (100 MHz,  $\text{DMSO-}d_6$ )  $\delta$  154.70, 130.21, 123.37, 109.37, 65.06, 25.96.

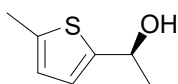

**(S)-1-(5-Methyl-thiophen-2-yl)ethan-1-ol (P25):** Light yellow oil, purified by silica gel chromatography (petroleum ether/ethylacetate =10:1), 81% yield, 39 mg, 99.4% ee, S isomer;  $[a]_D^{25} = -28.8$  ( $c = 1.00$  in  $\text{CHCl}_3$ ), (lit.2  $[a]_D^{25} = -31.9$  ( $c = 1.0$ ,  $\text{CHCl}_3$ ));  $^1\text{H NMR}$  (400 MHz,  $\text{DMSO-}d_6$ )  $\delta$  6.68(d,  $J = 2.0$  Hz, 2H), 6.60(d,  $J = 2.0$  Hz, 1H), 5.37(d,  $J = 2.0$  Hz, 1H), 4.82-4.85(m, 1H), 2.38(s, 1H), 1.37(d,  $J = 4.0$  Hz, 3H).  $^{13}\text{C}\{\text{H}\}$  NMR (100 MHz,  $\text{DMSO-}d_6$ )  $\delta$  149.83, 137.50, 124.91, 122.52, 64.89, 26.22, 15.46.

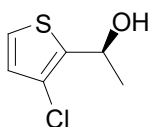

**(S)-1-(3-Chlorothiophen-2-yl)ethan-1-ol (P26):** Light yellow oil, purified by silica gel chromatography (petroleum ether/ethylacetate =20:1), 99% yield, 55 mg, 99.7% ee, S isomer;  $[a]_D^{25} = -38.7$  ( $c = 1.00$  in  $\text{CHCl}_3$ ), (lit.2  $[a]_D^{25} = -42.9$  ( $c = 1.0$ ,  $\text{CHCl}_3$ ));  $^1\text{H NMR}$  (400 MHz,  $\text{DMSO-}d_6$ )  $\delta$  7.51(d,  $J = 4.0$  Hz, 1H), 6.97(d,  $J = 2.0$  Hz, 1H), 5.76(d,  $J = 2.0$  Hz, 1H),

4.98-5.04(m, 1H), 1.37(d,  $J = 2.0$  Hz, 3H).  $^{13}\text{C}\{\text{H}\}$  NMR (100 MHz,  $\text{DMSO-}d_6$ )  $\delta$  145.03, 127.69, 124.59, 118.56, 63.49, 25.30.

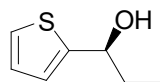

**(S)-1-(Thiophen-2-yl)propan-1-ol (P27):** Light yellow oil, purified by silica gel chromatography (petroleum ether/ethylacetate =10:1), 90% yield, 44 mg, 99.0% ee, S isomer;  $[\alpha]_D^{25} = -18.4$  ( $c = 1.00$  in  $\text{CHCl}_3$ ), (lit.7  $[\alpha]_D^{20} = -22.1$  ( $c = 0.9$ ,  $\text{CHCl}_3$ ));  $^1\text{H}$  NMR (400 MHz,  $\text{CDCl}_3$ )  $\delta$  7.24(d,  $J = 2.0$  Hz, 1H), 6.94-6.96(m, 2H), 4.81-4.84(m, 1H), 2.13(s, 1H), 1.83-1.90(m, 2H), 0.94-0.97(m, 3H).  $^{13}\text{C}\{\text{H}\}$  NMR (100 MHz,  $\text{CDCl}_3$ )  $\delta$  146.83, 124.76, 122.65, 121.96, 69.92, 30.41, 8.34.

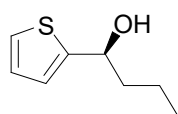

**(S)-1-(Thiophen-2-yl)butan-1-ol (P28):** Colorless oil, purified by silica gel chromatography (petroleum ether/ethylacetate =10:1), 94% yield, 50 mg, 97.5% ee, S isomer;  $[\alpha]_D^{25} = -21.6$  ( $c = 1.00$  in  $\text{CHCl}_3$ ), (lit.8  $[\alpha]_D^{25} = -21.1$  ( $c = 1.0$ ,  $\text{CHCl}_3$ ));  $^1\text{H}$  NMR (400 MHz,  $\text{DMSO-}d_6$ )  $\delta$  7.36(d,  $J = 2.0$  Hz, 1H), 6.91-6.95(m, 2H), 5.46(d,  $J = 2.0$  Hz, 1H), 4.75(s, 1H), 1.62-1.69(m, 2H), 1.29-1.39(m, 2H), 0.86-0.89(m, 3H).  $^{13}\text{C}\{\text{H}\}$  NMR (100 MHz,  $\text{DMSO-}d_6$ )  $\delta$  151.51, 126.85, 124.28, 123.14, 68.55, 42.16, 18.96, 14.26.

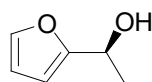

**(S)-1-(Furan-2-yl)ethan-1-ol (P29):** Colorless oil, purified by silica gel chromatography (petroleum ether/ethylacetate =20:1), 99% yield, 38 mg, 99.6% ee, S isomer;  $[\alpha]_D^{25} = -40.4$  ( $c = 1.00$  in  $\text{CHCl}_3$ ), (lit.2  $[\alpha]_D^{25} = -43.3$  ( $c = 1.0$ ,  $\text{CHCl}_3$ ));  $^1\text{H}$  NMR (400 MHz,  $\text{CDCl}_3$ );  $\delta$  7.37(d,  $J = 2.0$  Hz, 1H), 6.33(d,  $J = 2.0$  Hz, 1H), 6.22(d,  $J = 2.0$  Hz, 1H), 4.85-4.90(m, 1H), 2.08(s, 1H), 1.54(d,  $J = 4.0$  Hz, 3H).  $^{13}\text{C}\{\text{H}\}$  NMR (100 MHz,  $\text{CDCl}_3$ )  $\delta$  157.63, 141.91, 110.13, 105.11, 63.62, 21.27.

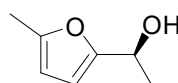

**(S)-1-(5-methylfuran-2-yl)ethan-1-ol (P30):** Colorless oil, purified by silica gel chromatography (petroleum ether/ethylacetate =20:1), 92% yield, 10 mg, 98.8% ee, S isomer;  $[\alpha]_D^{25} = -18.7$  ( $c = 1.00$  in  $\text{CHCl}_3$ ), (lit.2  $[\alpha]_D^{25} = -24.9$  ( $c = 1.0$ ,  $\text{CHCl}_3$ ));  $^1\text{H}$  NMR (400 MHz,  $\text{DMSO-}d_6$ )  $\delta$  6.06(s, 1H), 5.95(s, 1H), 5.12(s, 1H), 4.60(s, 1H), 2.23(d,  $J = 2.0$  Hz, 3H), 1.32-1.35(m, 3H).  $^{13}\text{C}\{\text{H}\}$  NMR (100 MHz,  $\text{DMSO-}d_6$ )  $\delta$  157.66, 150.41, 106.43, 105.66, 62.16, 22.43, 13.75.

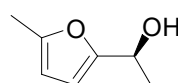

**(S)-1-(5-methylfuran-2-yl)propan-1-ol (P31):** Colorless oil, purified by silica gel chromatography (petroleum ether/ethylacetate =20:1), 99% yield, 12 mg, 98.8% ee, S isomer;  $[\alpha]_D^{25} = -42.5$  ( $c = 1.00$  in  $\text{CHCl}_3$ ), (lit.2  $[\alpha]_D^{25} = -43.8$  ( $c = 1.0$ ,  $\text{CHCl}_3$ ));  $^1\text{H}$  NMR (600

MHz, DMSO- $d_6$ )  $\delta$  6.06(d,  $J$  = 1.5 Hz, 1H), 5.95(d,  $J$  = 1.5 Hz, 2H), 5.09(d,  $J$  = 3.0 Hz, 1H), 4.31-4.34(m, 1H), 2.22(s, 3H), 1.63-1.70(m, 2H), 0.82-0.85(m, 3H).  $^{13}\text{C}\{\text{H}\}$  NMR (150 MHz, DMSO- $d_6$ )  $\delta$  156.76, 150.39, 160.40, 106.35, 67.82, 29.01, 13.75, 10.54.

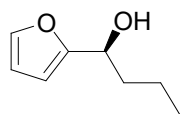

**(S)-1-(furan-2-yl)butan-1-ol (P32):** Light yellow oil, purified by silica gel chromatography (petroleum ether/ethylacetate =20:1), 98% yield, 12 mg, 99.9% ee, S isomer;  $[\alpha]_D^{25}$  = -19.3 ( $c$  = 1.00 in  $\text{CHCl}_3$ ), (lit.2  $[\alpha]_D^{25}$  = - 24.0 ( $c$  = 1.0,  $\text{CHCl}_3$ ));  $^1\text{H}$  NMR (400 MHz,  $\text{CDCl}_3$ )  $\delta$  7.36(s, 1H), 6.32(d,  $J$  = 2.0 Hz, 1H), 6.22(d,  $J$  = 2.0 Hz, 1H), 4.65-4.69(m, 1H), 2.03(s, 1H), 1.80-1.85(m, 1H), 1.33-1.41(m, 2H), 0.92-0.96(m, 3H).  $^{13}\text{C}\{\text{H}\}$  NMR (100 MHz,  $\text{CDCl}_3$ )  $\delta$  156.95, 141.84, 110.09, 105.74, 67.52, 37.63, 18.77, 13.84.

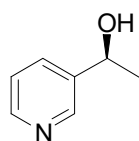

**(S)-1-(pyridin-3-yl)ethan-1-ol (P33):** Colorless oil, purified by silica gel chromatography (petroleum ether/ethylacetate =2:1), 99% yield, 42 mg, 97.6% ee, S isomer;  $[\alpha]_D^{25}$  = -44.1 ( $c$  = 1.00 in  $\text{CHCl}_3$ ), (lit.2  $[\alpha]_D^{25}$  = - 49.2 ( $c$  = 1.0,  $\text{CHCl}_3$ ));  $^1\text{H}$  NMR (400 MHz,  $\text{CDCl}_3$ )  $\delta$  8.49(d,  $J$  = 2.0 Hz, 1H), 8.40(d,  $J$  = 2.0 Hz, 1H), 7.75(d,  $J$  = 4.0 Hz, 1H), 7.26-7.28(m, 1H), 4.90-4.95(m, 1H), 3.90(s, 1H), 1.51(d,  $J$  = 2.0 Hz, 3H).  $^{13}\text{C}\{\text{H}\}$  NMR (100 MHz,  $\text{CDCl}_3$ )  $\delta$  147.75, 146.70, 141.48, 133.43, 123.37, 67.38, 24.95.

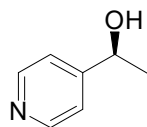

**(S)-1-(pyridin-4-yl)ethan-1-ol (P34):** Colorless oil, purified by silica gel chromatography (petroleum ether/ethylacetate =2:1), 99% yield, 42 mg, 97.2% ee, S isomer;  $[\alpha]_D^{25}$  = -40.8 ( $c$  = 1.00 in  $\text{CHCl}_3$ ), (lit.2  $[\alpha]_D^{25}$  = - 44.3 ( $c$  = 1.0,  $\text{CHCl}_3$ ));  $^1\text{H}$  NMR (400 MHz,  $\text{CDCl}_3$ )  $\delta$  8.46(d,  $J$  = 4.0 Hz, 2H), 7.32(d,  $J$  = 4.0 Hz, 2H), 4.87-4.92(m, 1H), 3.73(s, 1H), 1.49(d,  $J$  = 2.0 Hz, 3H).  $^{13}\text{C}\{\text{H}\}$  NMR (100 MHz,  $\text{CDCl}_3$ )  $\delta$  155.16, 148.35, 119.96, 67.78, 24.34.

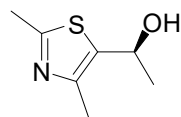

**(S)-1-(2,4-dimethylthiazol-5-yl)ethan-1-ol (P35):** White solid, mp: 88-89  $^\circ\text{C}$ , purified by silica gel chromatography (petroleum ether/ethylacetate =1:1), 99% yield, 53 mg, 99.2% ee, S isomer;  $[\alpha]_D^{25}$  = -41.7 ( $c$  = 1.00 in  $\text{CHCl}_3$ ), (lit.2  $[\alpha]_D^{25}$  = - 44.2 ( $c$  = 1.0,  $\text{CHCl}_3$ ));  $^1\text{H}$  NMR (600 MHz, DMSO- $d_6$ )  $\delta$  5.53(d,  $J$  = 1.5 Hz, 1H), 4.99-5.03(m, 1H), 2.59(s, 3H), 2.27(s, 3H), 1.38(d,  $J$  = 3.0 Hz, 3H).  $^{13}\text{C}\{\text{H}\}$  NMR (150 MHz, DMSO- $d_6$ )  $\delta$  161.90, 145.40, 138.52, 62.40, 26.36, 19.17, 15.29.

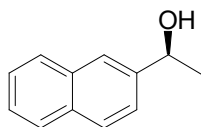

**(S)-1-(naphthalen-2-yl)ethan-1-ol (P36):** White solid, Mp: 71-72 °C, purified

by silica gel chromatography (petroleum ether/ethylacetate =10:1), 99% yield, 58 mg, 97.4% ee, S isomer;  $[\alpha]_{\text{D}}^{25} = -44.2$  ( $c = 1.00$  in  $\text{CHCl}_3$ ), (lit.2  $[\alpha]_{\text{D}}^{25} = -40.2$  ( $c = 1.0$ ,  $\text{CHCl}_3$ ));  $^1\text{H NMR}$  (600 MHz,  $\text{DMSO-}d_6$ )  $\delta$  7.88-7.92(m, 4H), 7.50-7.57(m, 3H), 5.35(d,  $J = 3.0$  Hz, 1H), 4.94(s, 1H), 1.45-1.46(m, 3H).  $^{13}\text{C}\{\text{H}\}$  NMR (150 MHz,  $\text{DMSO-}d_6$ )  $\delta$  145.43, 133.37, 132.62, 128.17, 128.00, 127.94, 126.41, 125.86, 124.86, 123.68, 68.66, 26.32.

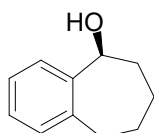

**(S)-6,7,8,9-tetrahydro-5H-benzo[7]annulen-5-ol (P37):** White solid, mp:

66-68 °C, purified by silica gel chromatography (petroleum ether/ethylacetate = 1:1), 60 % yield, 17 mg, 99.6% ee, S isomer;  $[\alpha]_{\text{D}}^{25} = -23.4$  ( $c = 1.00$  in  $\text{CHCl}_3$ ), (lit.2  $[\alpha]_{\text{D}}^{25} = -27.0$  ( $c = 1.0$ ,  $\text{CHCl}_3$ ));  $^1\text{H NMR}$  (600 MHz,  $\text{DMSO-}d_6$ )  $\delta$  7.44(d,  $J = 3.0$  Hz, 1H), 7.13-7.16(m, 1H), 7.05-7.09(m, 2H), 5.17(s, 1H), 4.73(d,  $J = 6.0$  Hz, 1H), 2.80-2.83(m, 1H), 2.65-2.69(m, 1H), 1.87-1.95(m, 2H), 1.70-1.75(m, 2H), 1.49-1.52(m, 1H), 1.25-1.27(m, 1H).  $^{13}\text{C}\{\text{H}\}$  NMR (150 MHz,  $\text{DMSO-}d_6$ )  $\delta$  146.18, 140.58, 129.27, 126.58, 126.06, 125.01, 71.99, 37.74, 35.46, 28.29, 27.89.

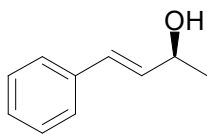

**(S)-4-phenylbut-3-en-2-ol (P38):** Light yellow oil, purified by silica gel

chromatography (petroleum ether/ethylacetate = 10:1), 88.6% yield, 45 mg, 73.8% ee, S isomer;  $[\alpha]_{\text{D}}^{25} = -22.0$  ( $c = 1.00$  in  $\text{CHCl}_3$ ), (lit.9  $[\alpha]_{\text{D}}^{25} = -12.1$  ( $c = 1.0$ ,  $\text{CHCl}_3$ ));  $^1\text{H NMR}$  (400 MHz,  $\text{DMSO-}d_6$ )  $\delta$  7.41 (d,  $J = 4.0$  Hz, 2H), 7.30 - 7.34 (m, 2H), 7.20 - 7.24 (m, 1H), 6.51 (d,  $J = 8.0$  Hz, 1H), 6.29 - 6.34 (m, 1H), 4.92 (d,  $J = 2.0$  Hz, 1H), 4.29 - 4.33 (m, 1H), 1.22 (d,  $J = 4.0$  Hz, 3H).  $^{13}\text{C}\{\text{H}\}$  NMR (100 MHz,  $\text{DMSO-}d_6$ )  $\delta$  137.41, 136.02, 129.11, 127.69, 127.65, 126.66, 67.15, 24.34.

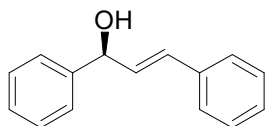

**(S)-1,3-diphenylprop-2-en-1-ol (P39):** Colorless oil, purified by silica

gel chromatography (petroleum ether/ethylacetate = 10:1), 99% yield, 72 mg, 78.3% ee, S isomer;  $[\alpha]_{\text{D}}^{25} = -12.5$  ( $c = 1.00$  in  $\text{CHCl}_3$ ), (lit.10  $[\alpha]_{\text{D}}^{25} = -8.3$  ( $c = 0.58$ ,  $\text{CHCl}_3$ ));  $^1\text{H NMR}$  (600 MHz,  $\text{DMSO-}d_6$ )  $\delta$  7.40 - 7.43 (m, 4H), 7.29 - 7.35 (m, 4H), 7.21 - 7.25 (m, 2H), 6.64 (d,  $J = 9.0$  Hz, 1H), 6.38 - 6.41 (m, 1H), 5.63 (d,  $J = 3.0$  Hz, 1H), 5.24 - 5.26 (m, 1H).  $^{13}\text{C}\{\text{H}\}$  NMR (150 MHz,  $\text{DMSO-}d_6$ )  $\delta$  144.90, 137.11, 134.16, 129.07, 128.62, 128.58, 127.86, 127.34, 126.75, 126.67, 73.63.

## 6. NMR spectra

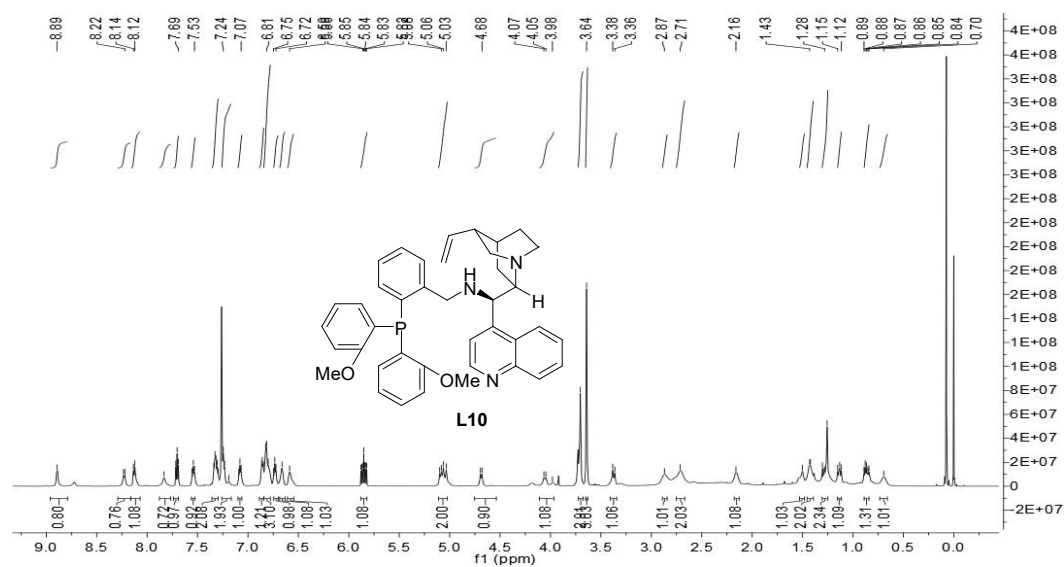

**<sup>1</sup>H NMR (CDCl<sub>3</sub>, 600 MHz) of L10**

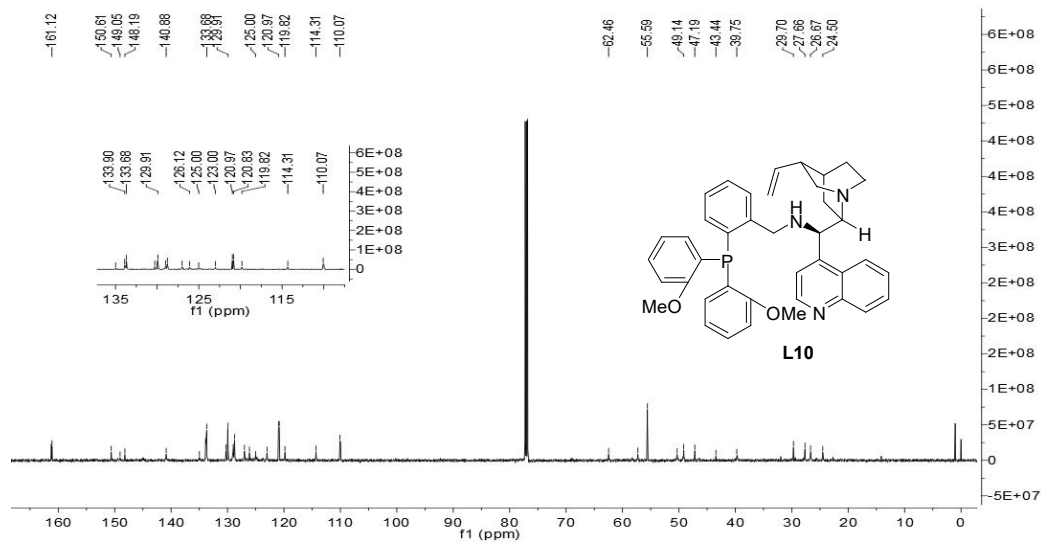

**<sup>13</sup>C{H} NMR (CDCl<sub>3</sub>, 150 MHz) of L10**

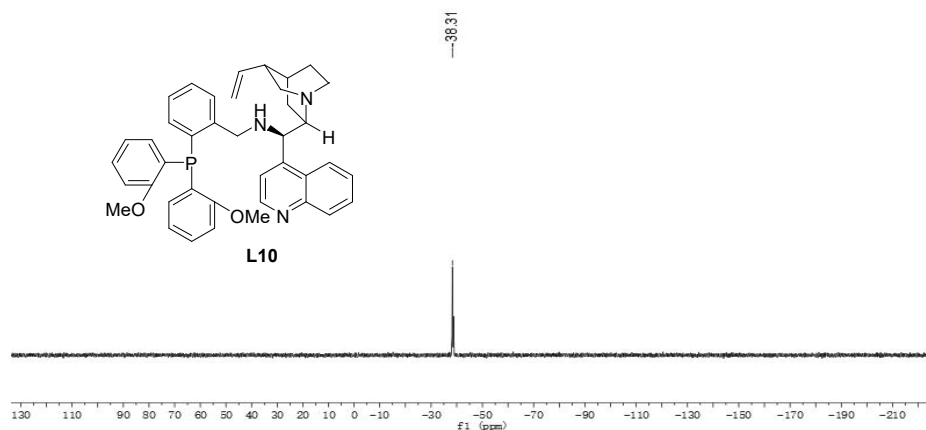

**<sup>31</sup>P{H} NMR (CDCl<sub>3</sub>, 303 MHz) of L10**



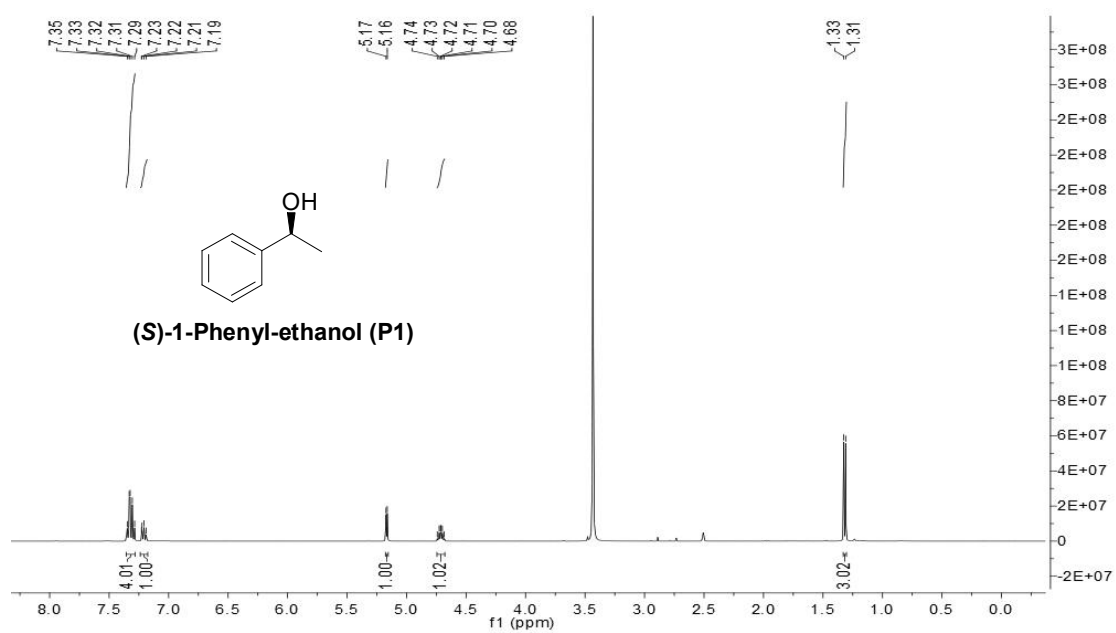

$^1\text{H}$  NMR (DMSO- $d_6$ , 400 MHz) of (S)-1-Phenyl-ethanol (P1)

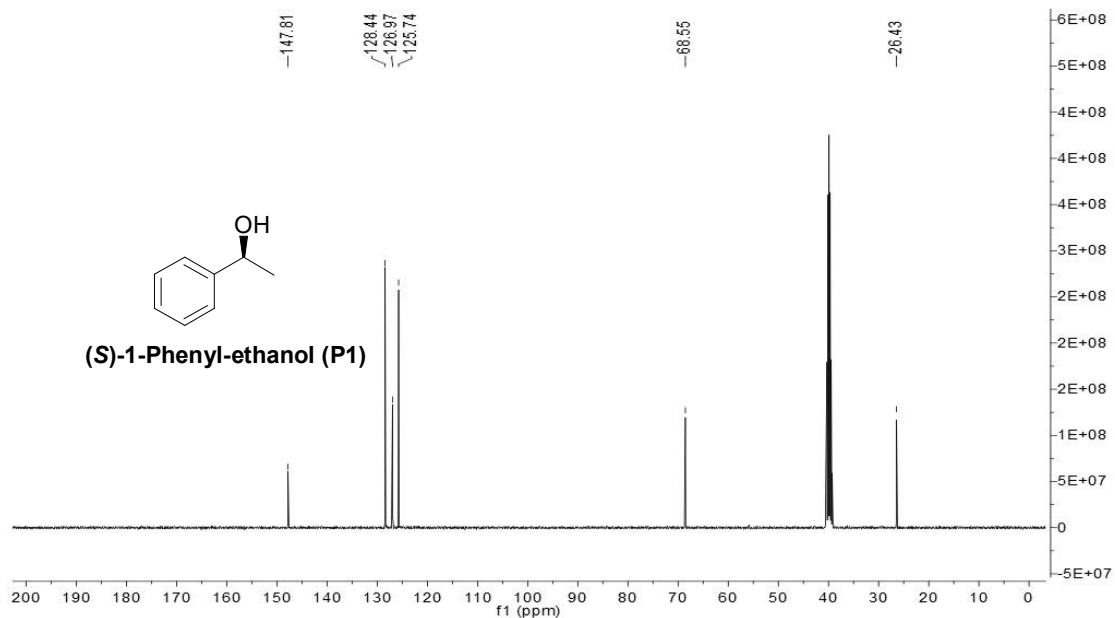

$^{13}\text{C}\{\text{H}\}$  NMR (DMSO- $d_6$ , 100 MHz) of (S)-1-Phenyl-ethanol (P1)

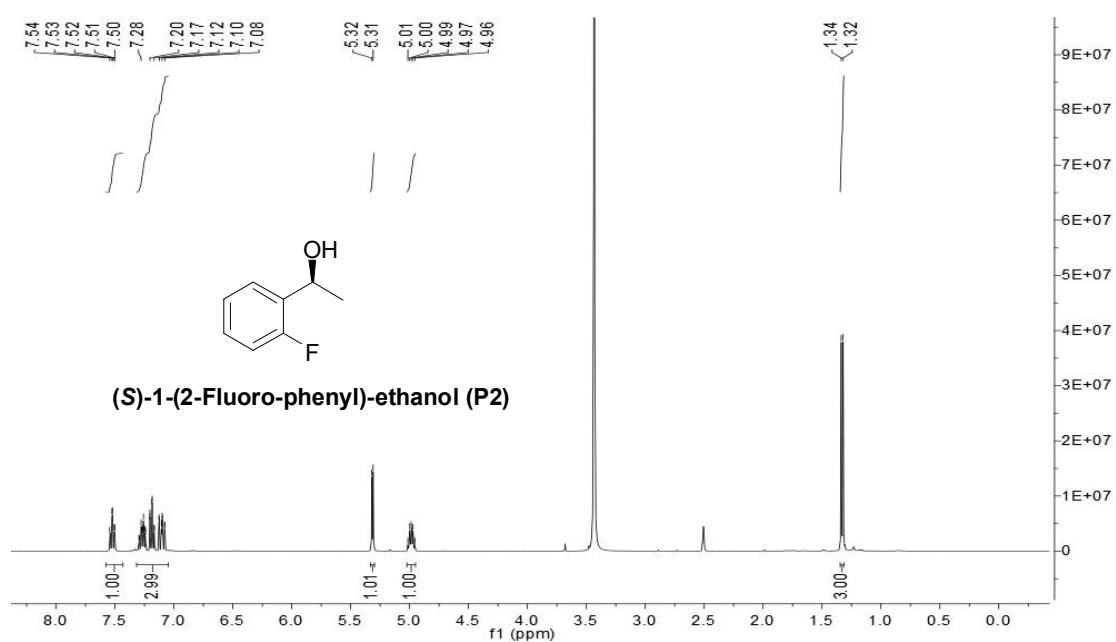

$^1\text{H}$  NMR (DMSO- $d_6$ , 400 MHz) of (S)-1-(2-Fluoro-phenyl)-ethanol (P2)

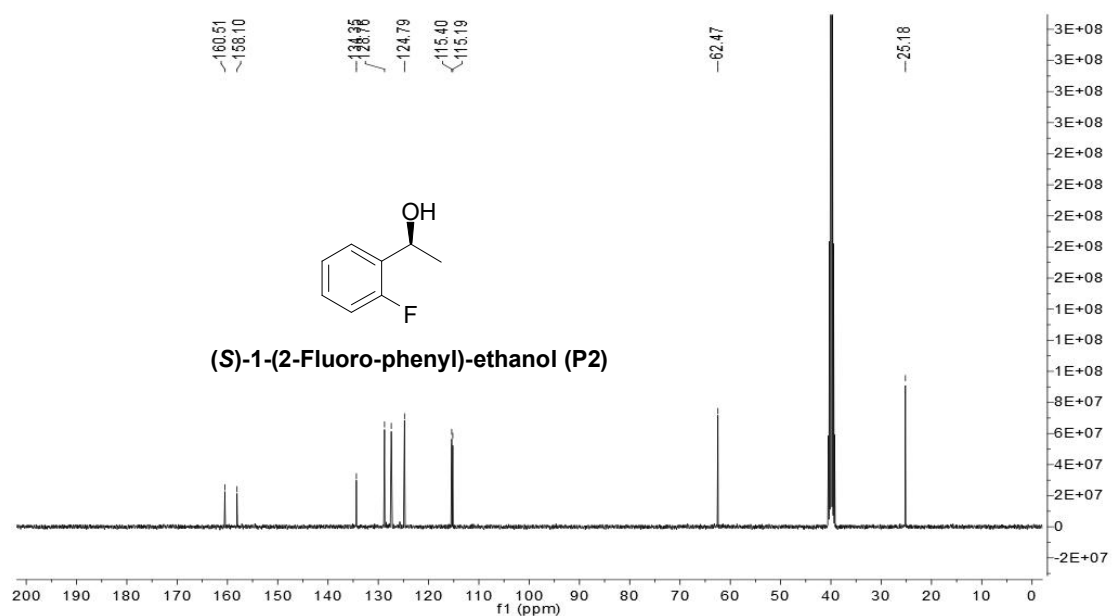

$^{13}\text{C}\{^1\text{H}\}$  NMR (DMSO- $d_6$ , 100 MHz) of (S)-1-(2-Fluoro-phenyl)-ethanol (P2)

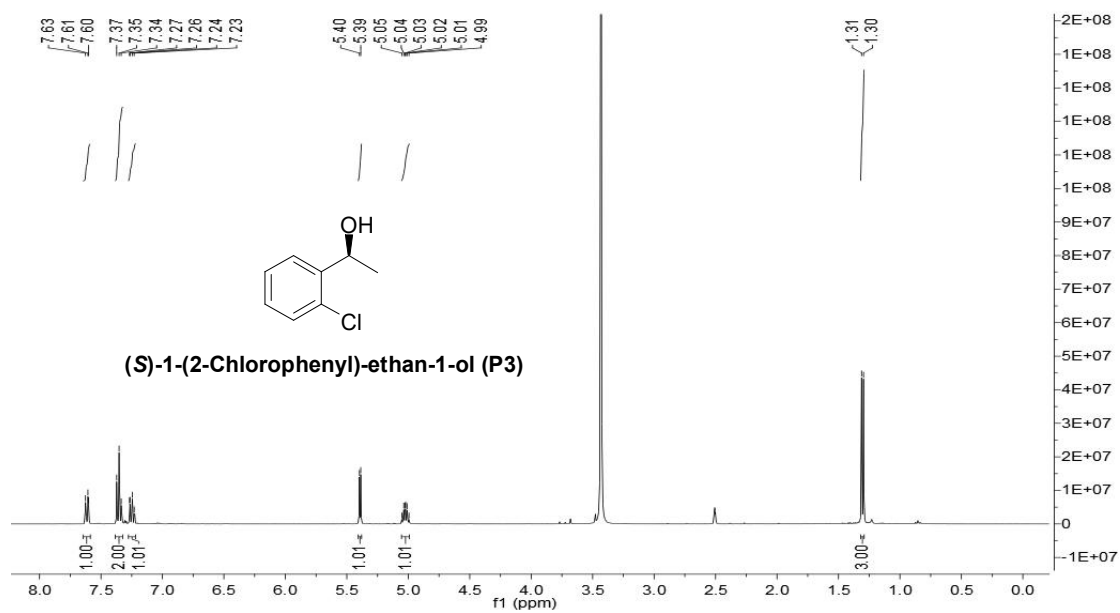

$^1\text{H}$  NMR (DMSO- $d_6$ , 400 MHz) of (S)-1-(2-chlorophenyl)ethan-1-ol (P3)

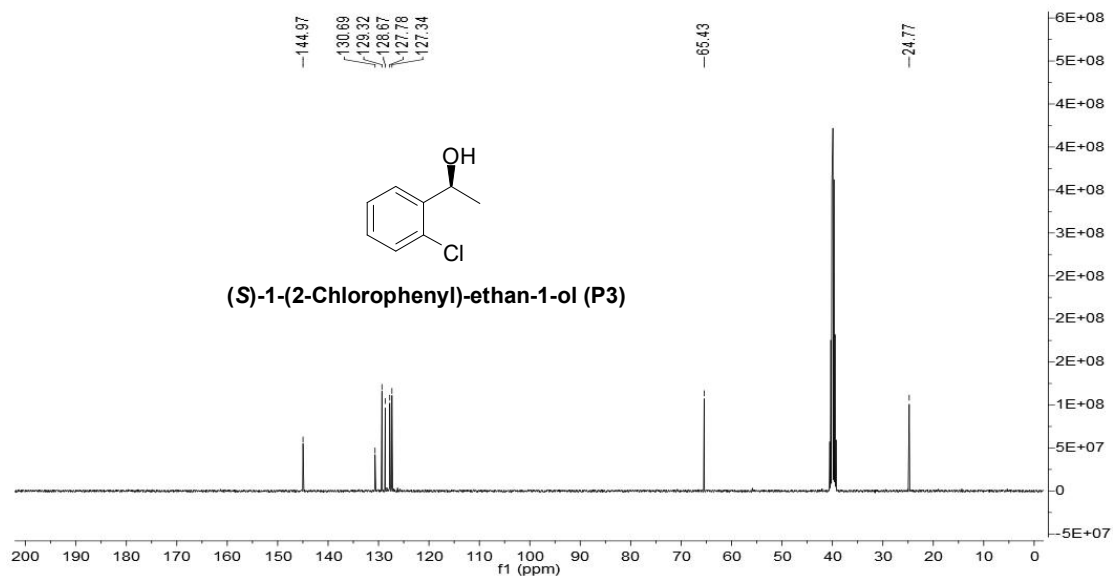

$^{13}\text{C}\{\text{H}\}$  NMR (DMSO- $d_6$ , 100 MHz) of (S)-1-(2-chlorophenyl)ethan-1-ol (P3)

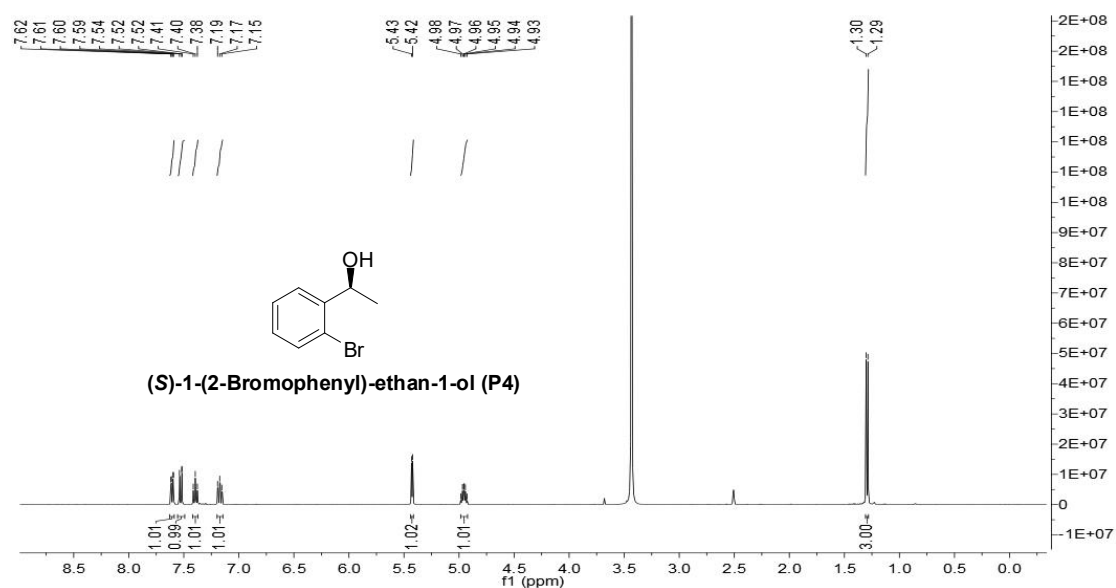

$^1\text{H}$  NMR (DMSO- $d_6$ , 400 MHz) of (S)-1-(2-Bromophenyl)-ethan-1-ol (P4)

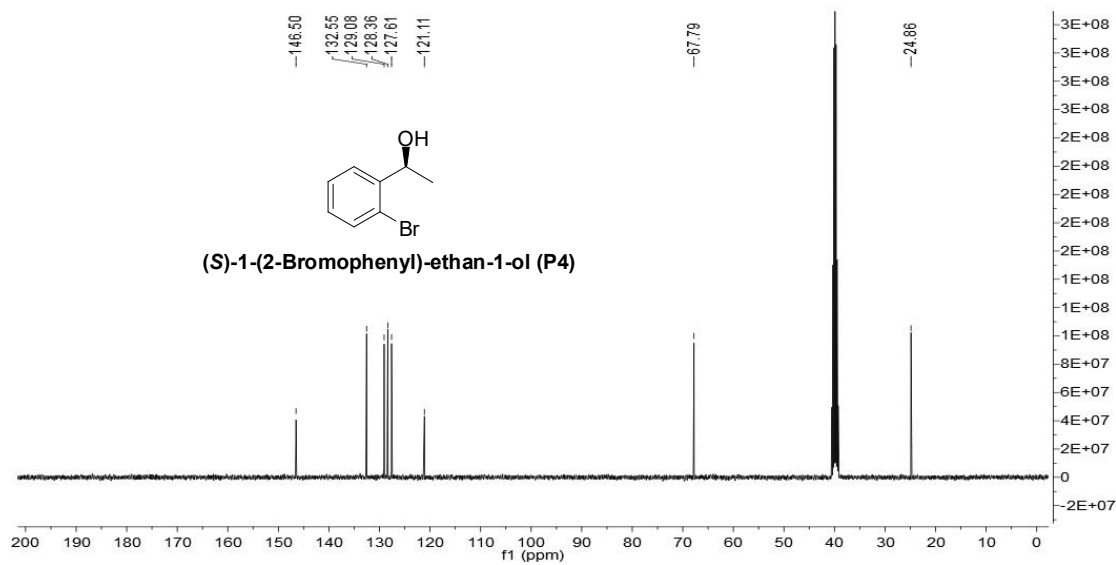

$^{13}\text{C}\{^1\text{H}\}$  NMR (DMSO- $d_6$ , 100 MHz) of (S)-1-(2-Bromophenyl)-ethan-1-ol (P4)

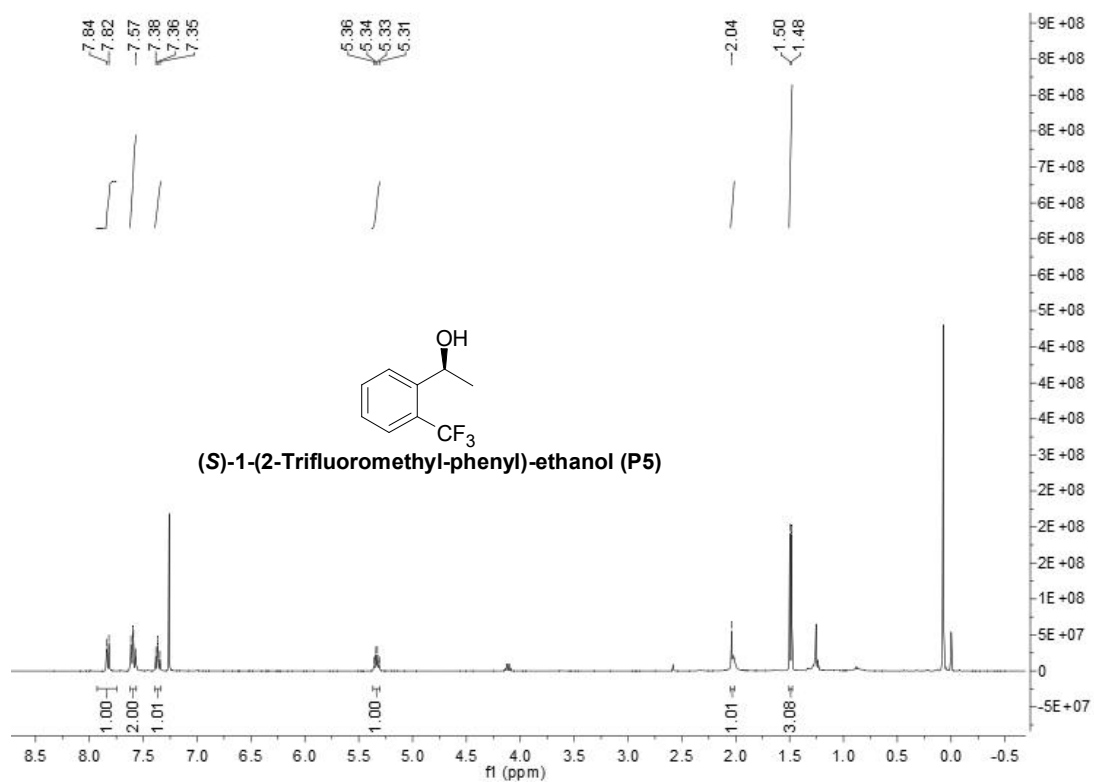

<sup>1</sup>H NMR (CDCl<sub>3</sub>, 400 MHz) of (S)-1-(2-Trifluoromethyl-phenyl)-ethanol (P5)

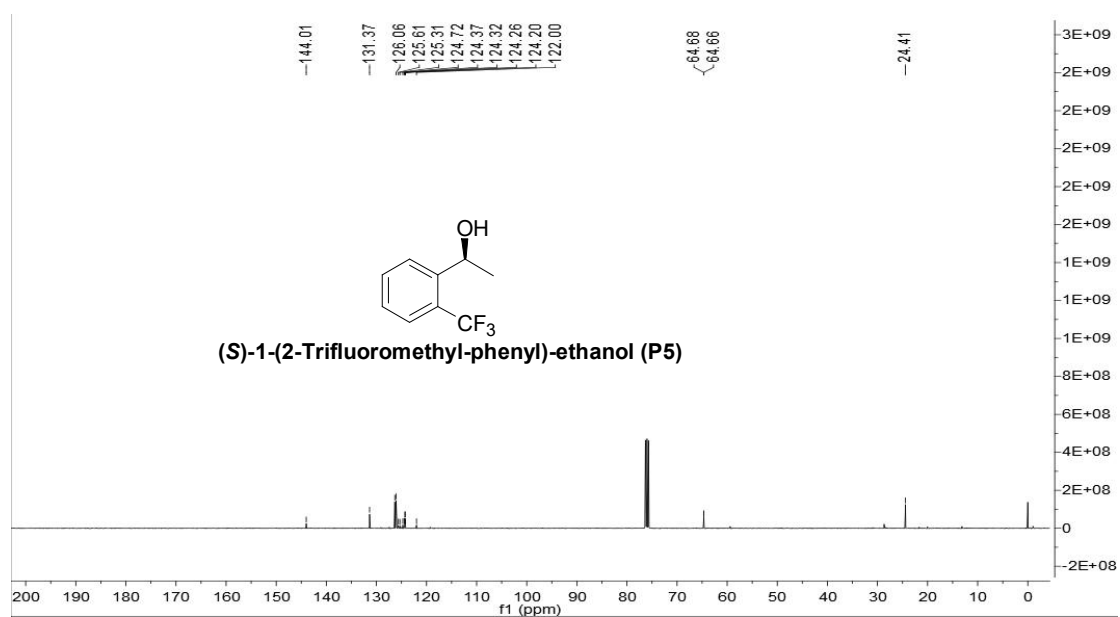

<sup>13</sup>C NMR (CDCl<sub>3</sub>, 100 MHz) of (S)-1-(2-Trifluoromethyl-phenyl)-ethanol (P5)

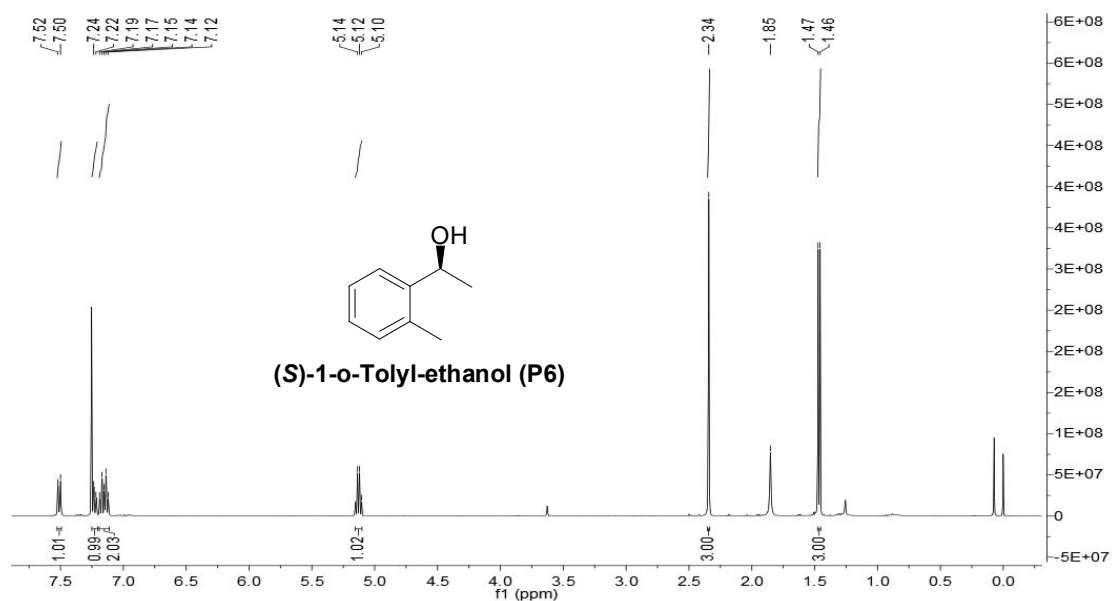

$^1\text{H}$  NMR ( $\text{CDCl}_3$ , 400 MHz) of (S)-1-o-Tolyl-ethanol (P6)

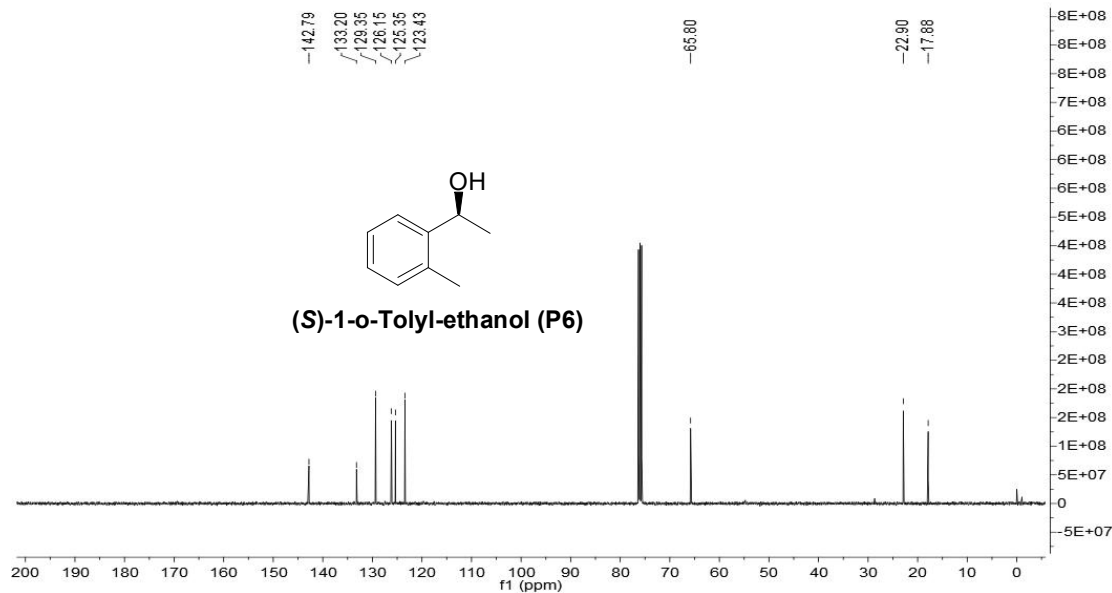

$^{13}\text{C}\{^1\text{H}\}$  NMR ( $\text{CDCl}_3$ , 100 MHz) of (S)-1-o-Tolyl-ethanol (P6)

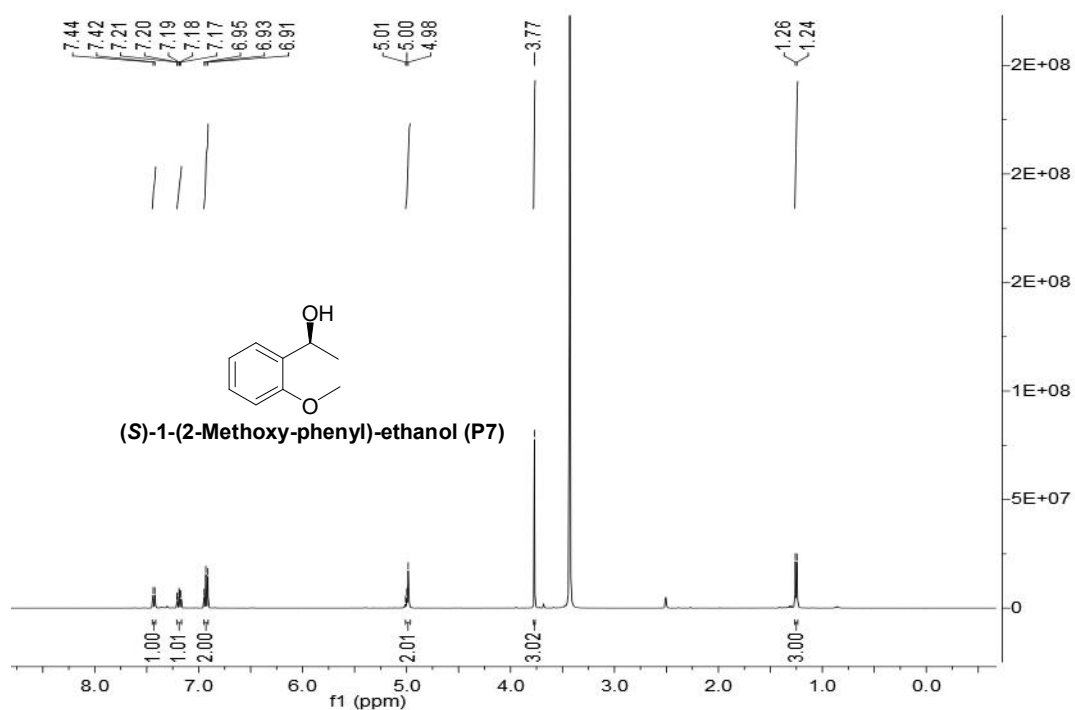

<sup>1</sup>H NMR (DMSO-d<sub>6</sub>, 400 MHz) of (S)-1-(2-Methoxy-phenyl)-ethanol (P7)

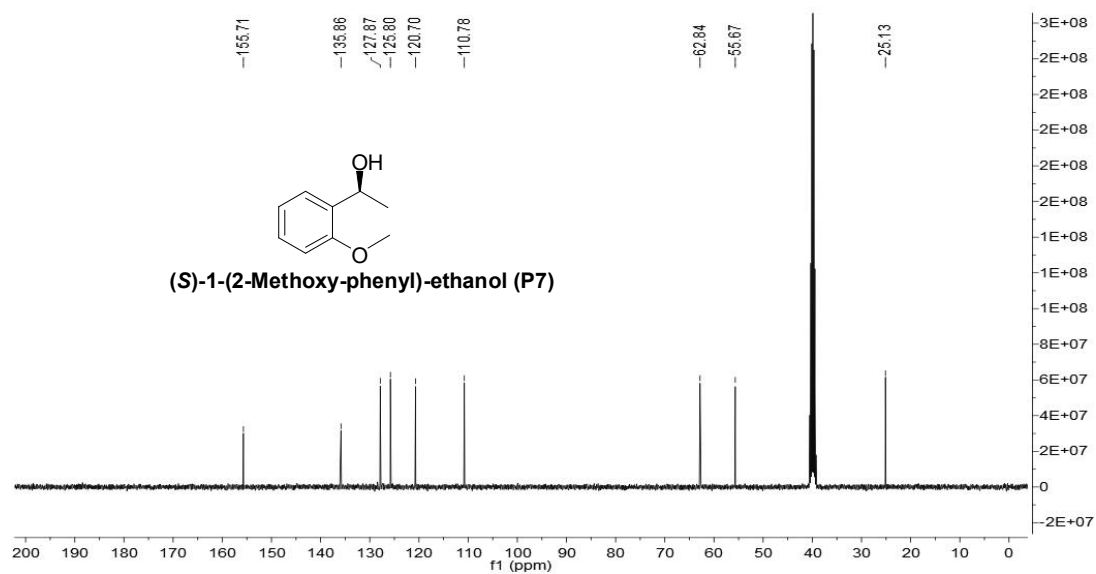

<sup>13</sup>C{H} NMR (DMSO-d<sub>6</sub>, 100 MHz) of (S)-1-(2-Methoxy-phenyl)-ethanol (P7)

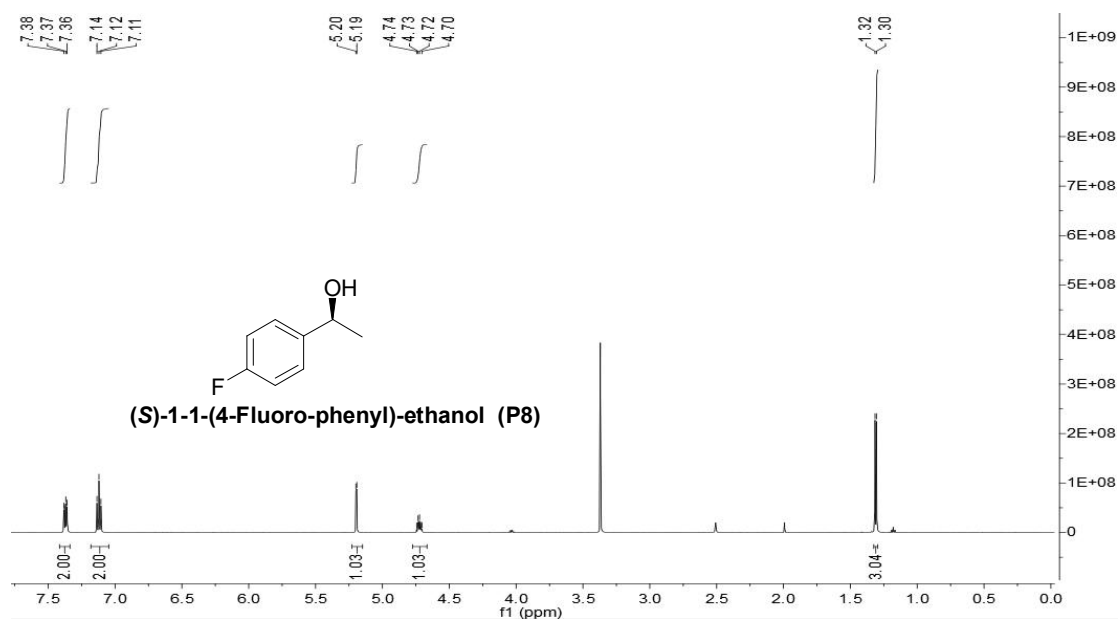

$^1\text{H}$  NMR (DMSO- $d_6$ , 600 MHz) of (S)-1-(4-Fluoro-phenyl)-ethanol (**P8**)

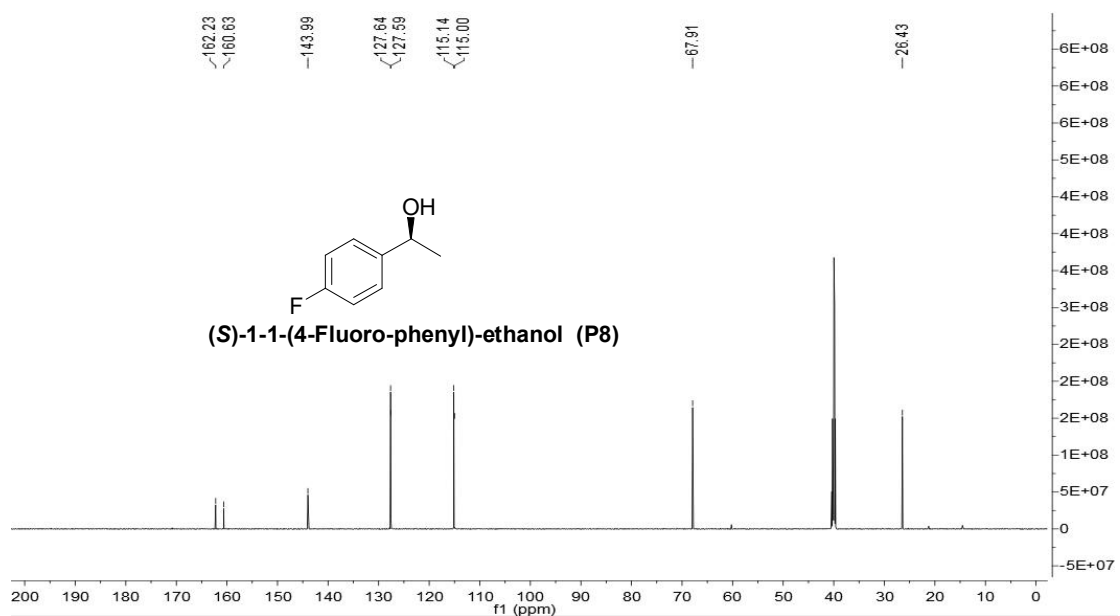

$^{13}\text{C}\{\text{H}\}$  NMR (DMSO- $d_6$ , 150 MHz) of (S)-1-(4-Fluoro-phenyl)-ethanol (**P8**)



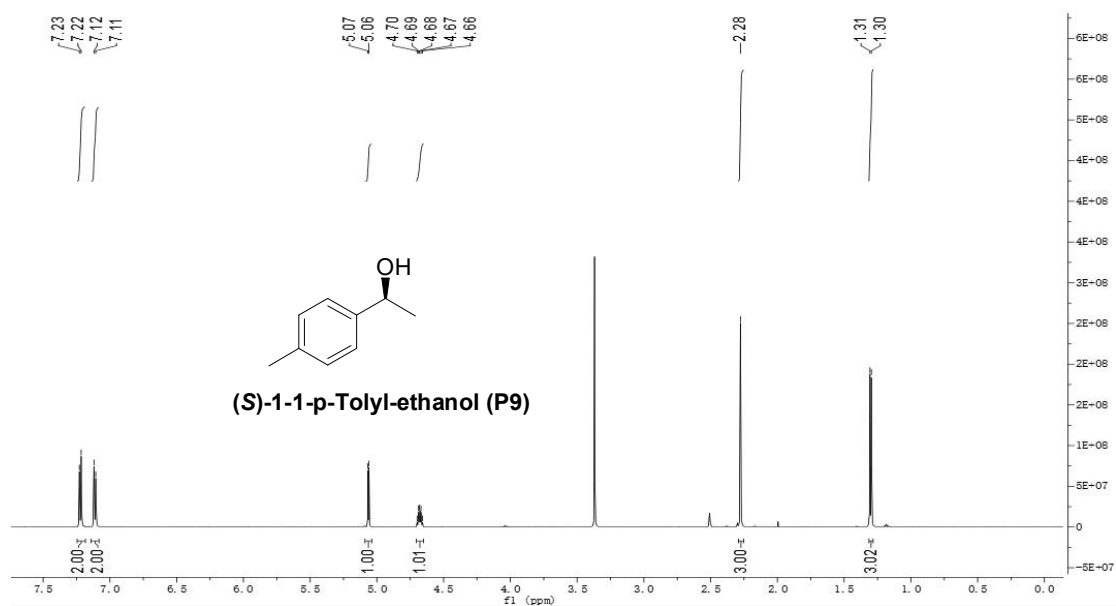

$^1\text{H}$  NMR (DMSO- $d_6$ , 600 MHz) of (S)-1-1-p-Tolyl-ethanol (P9)

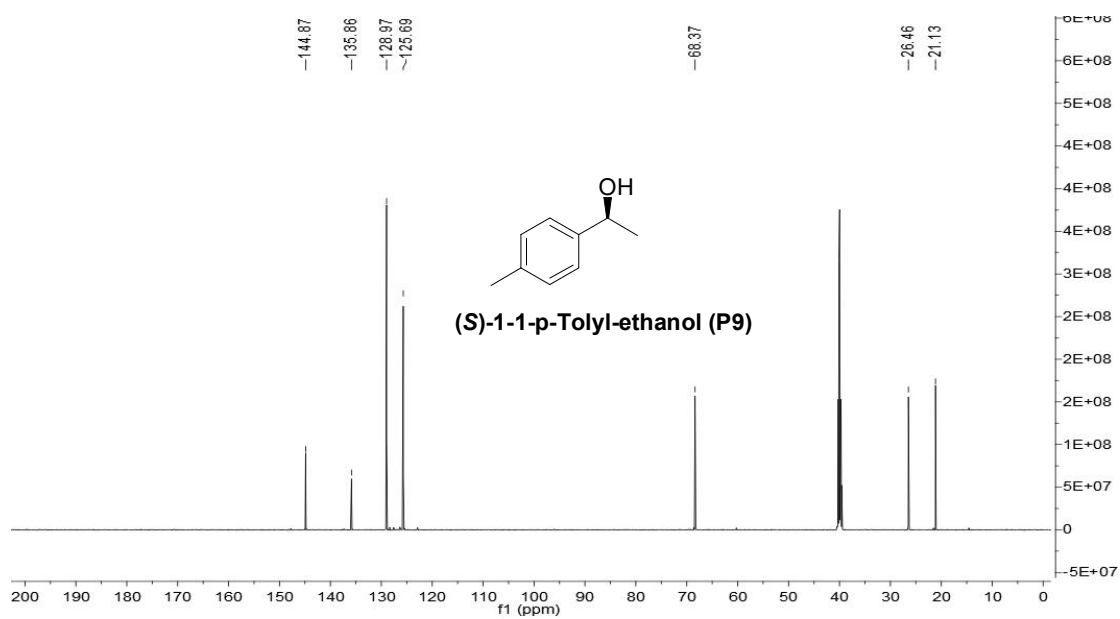

$^{13}\text{C}\{^1\text{H}\}$  NMR (DMSO- $d_6$ , 150 MHz) of (S)-1-1-p-Tolyl-ethanol (P9)

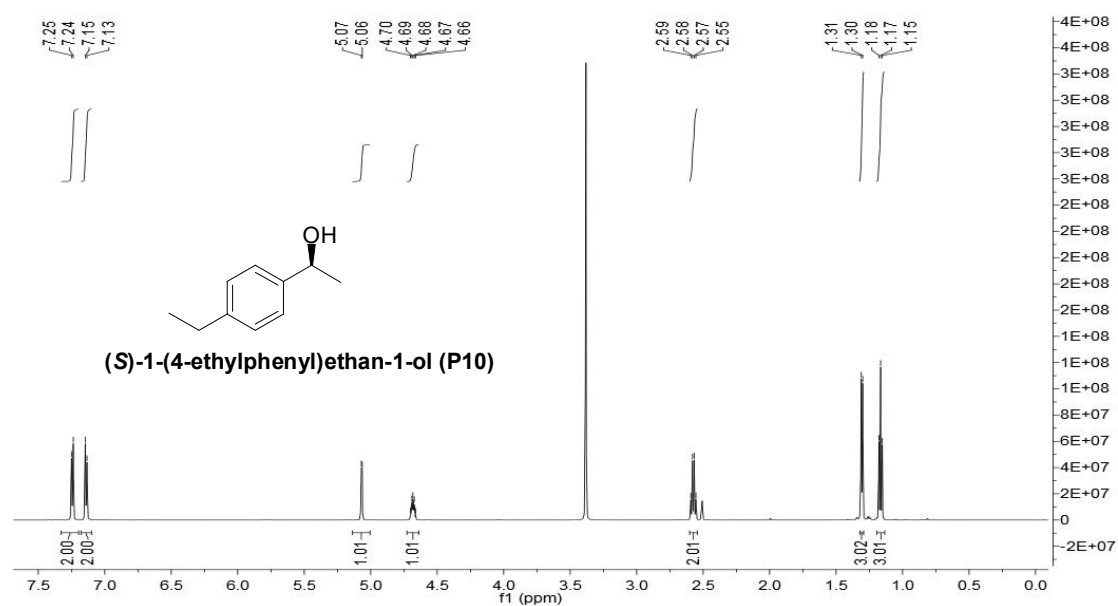

$^1\text{H}$  NMR (DMSO- $d_6$ , 600 MHz) of (S)-1-(4-ethylphenyl)ethan-1-ol (P10)

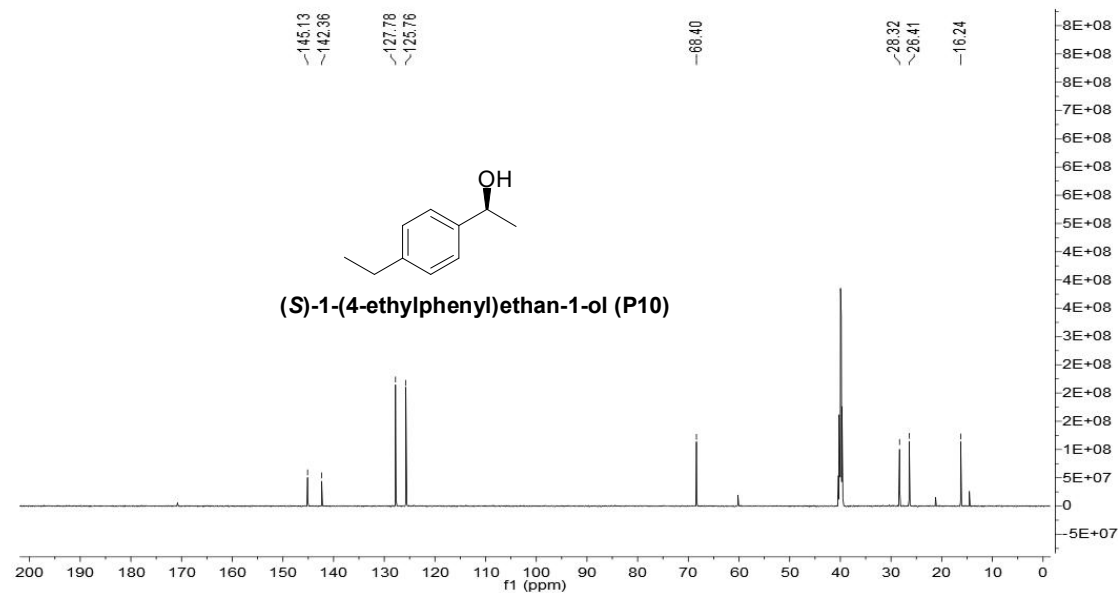

$^{13}\text{C}\{^1\text{H}\}$  NMR (DMSO- $d_6$ , 150 MHz) of (S)-1-(4-ethylphenyl)ethan-1-ol (P10)

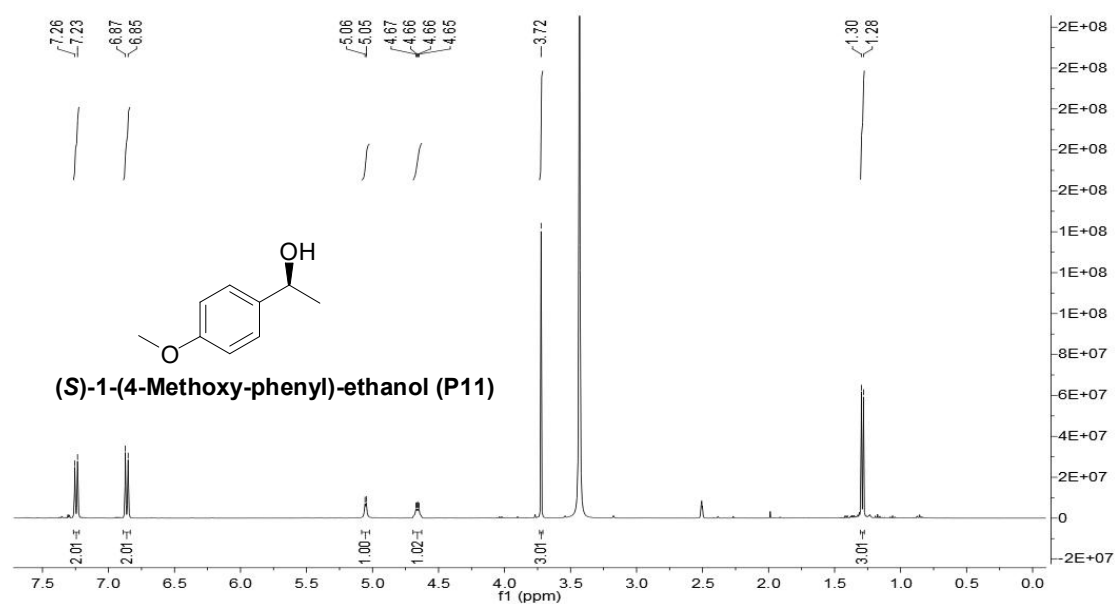

$^1\text{H}$  NMR (DMSO- $d_6$ , 600 MHz) of (S)-1-(4-Methoxy-phenyl)-ethanol (P11)

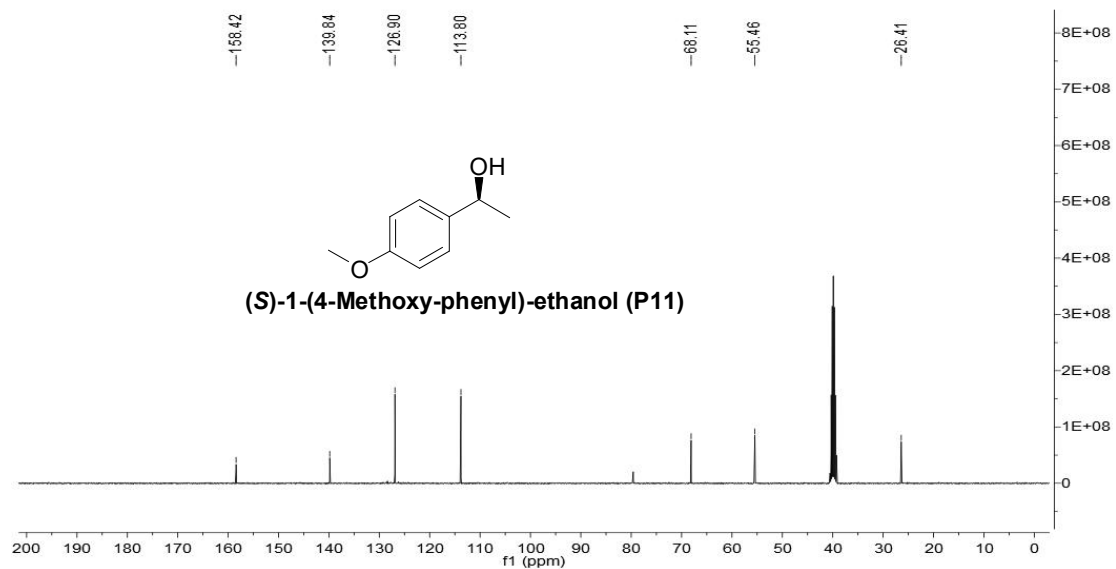

$^{13}\text{C}\{^1\text{H}\}$  NMR (DMSO- $d_6$ , 150 MHz) of (S)-1-(4-Methoxy-phenyl)-ethanol (P11)

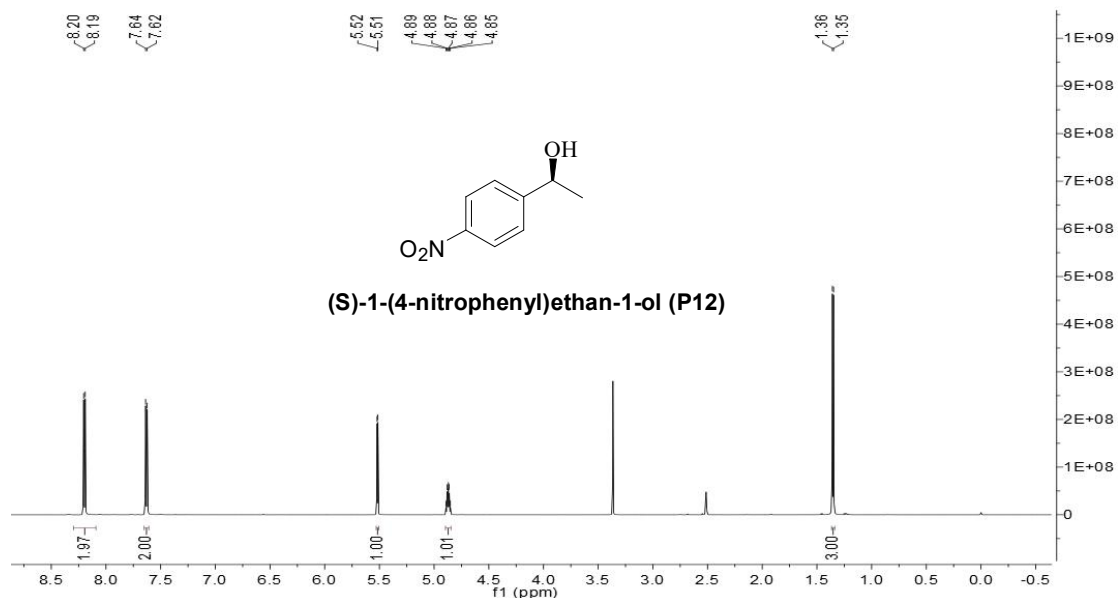

<sup>1</sup>H NMR (DMSO-*d*<sub>6</sub>, 600 MHz) of (S)-1-(4-nitrophenyl)ethan-1-ol (P12)

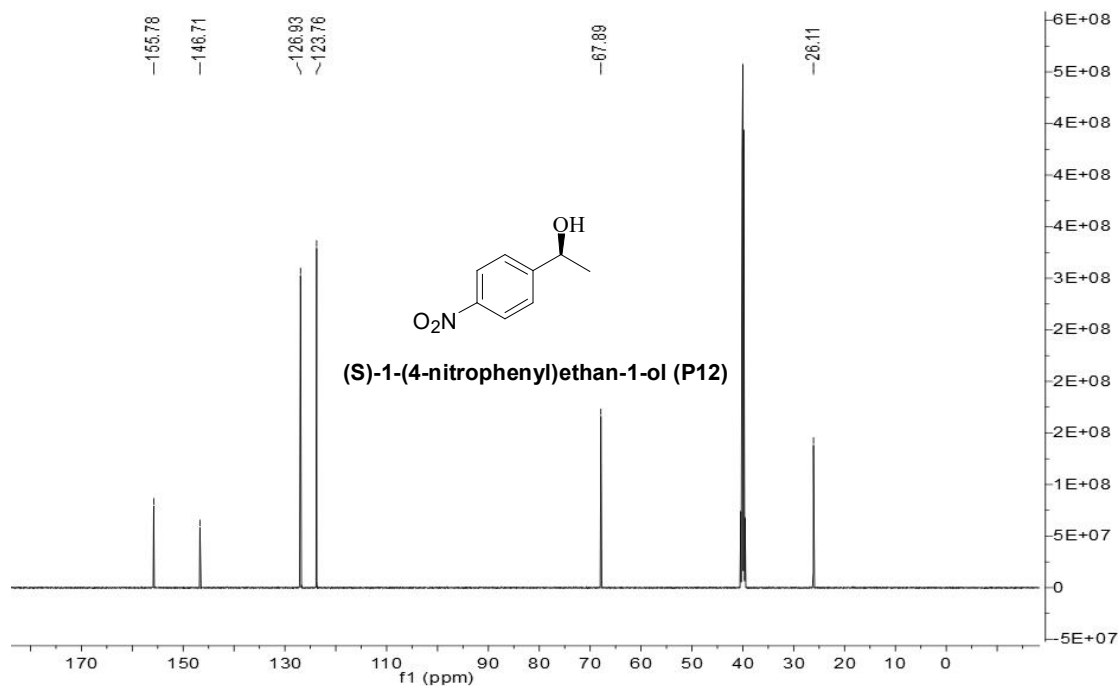

<sup>13</sup>C{H} NMR (DMSO-*d*<sub>6</sub>, 150 MHz) of (S)-1-(4-nitrophenyl)ethan-1-ol (P12)

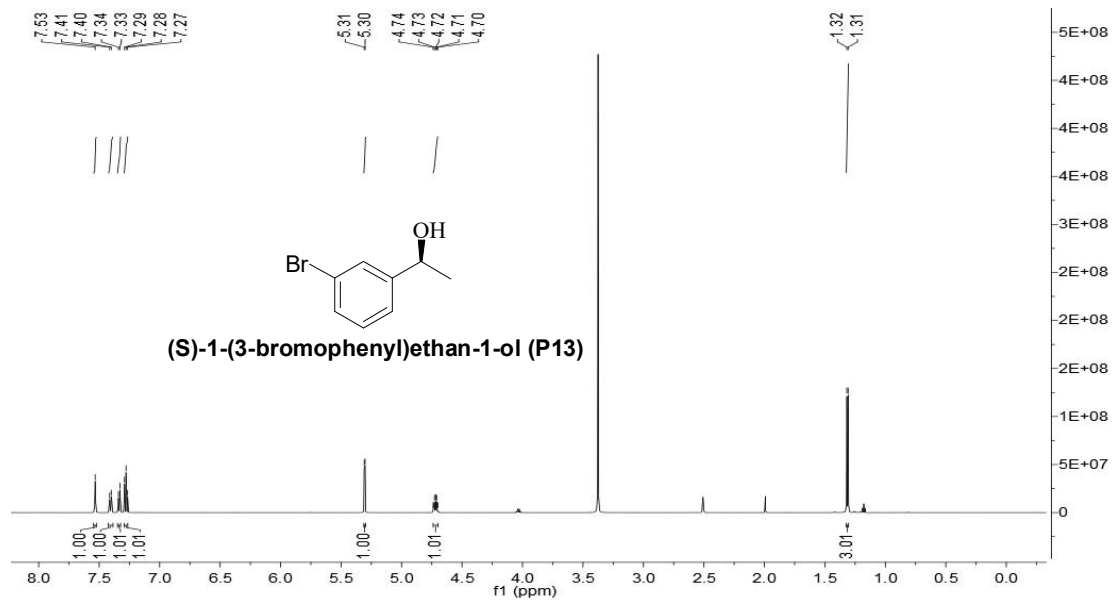

<sup>1</sup>H NMR (DMSO-*d*<sub>6</sub>, 600 MHz) of (S)-1-(3-bromophenyl)ethan-1-ol (P13)

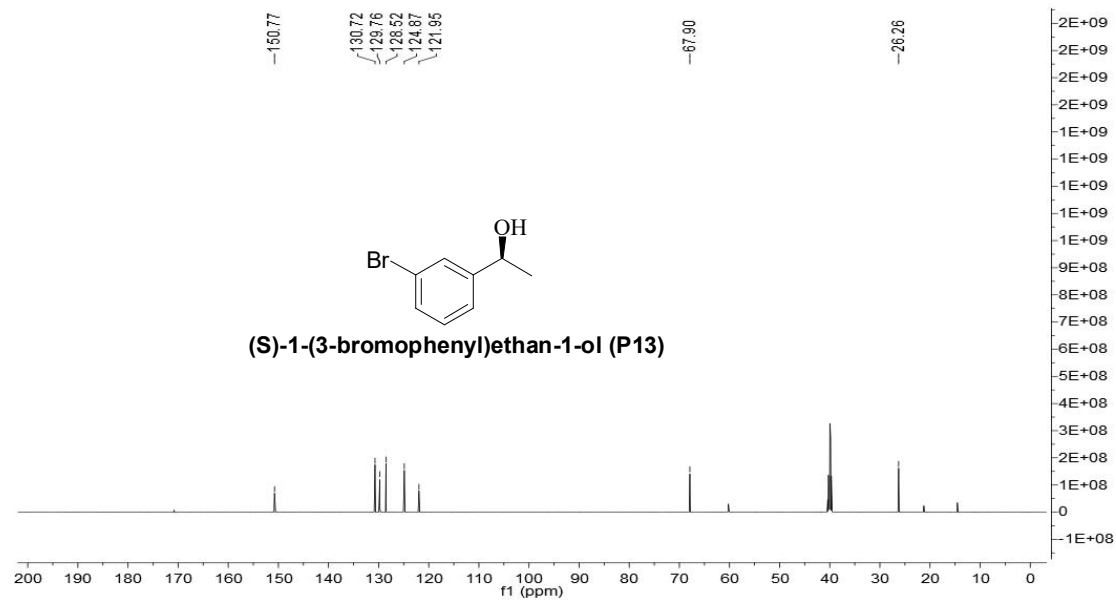

<sup>13</sup>C NMR (DMSO-*d*<sub>6</sub>, 150 MHz) of (S)-1-(3-bromophenyl)ethan-1-ol (P13)

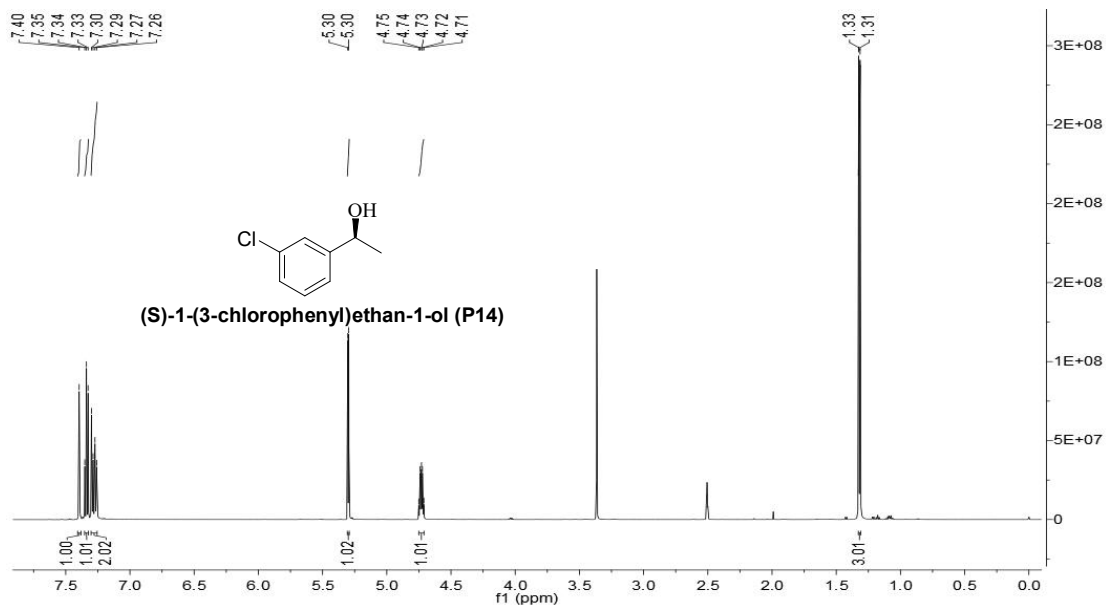

<sup>1</sup>H NMR (DMSO-*d*<sub>6</sub>, 600 MHz) of (S)-1-(3-chlorophenyl)ethan-1-ol (P14)

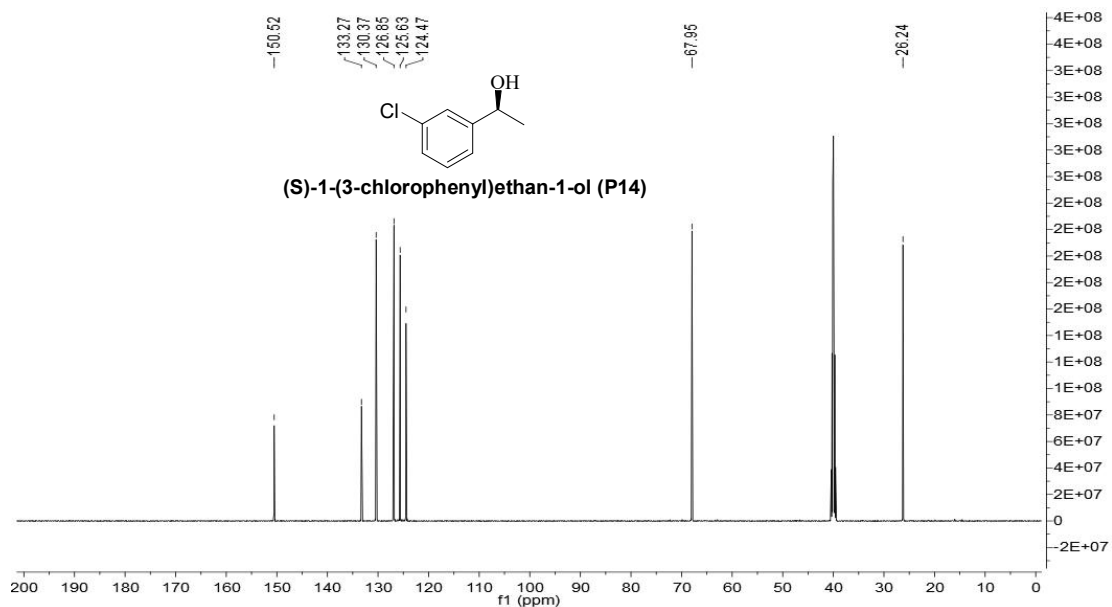

<sup>13</sup>C NMR (DMSO-*d*<sub>6</sub>, 150 MHz) of (S)-1-(3-chlorophenyl)ethan-1-ol (P14)

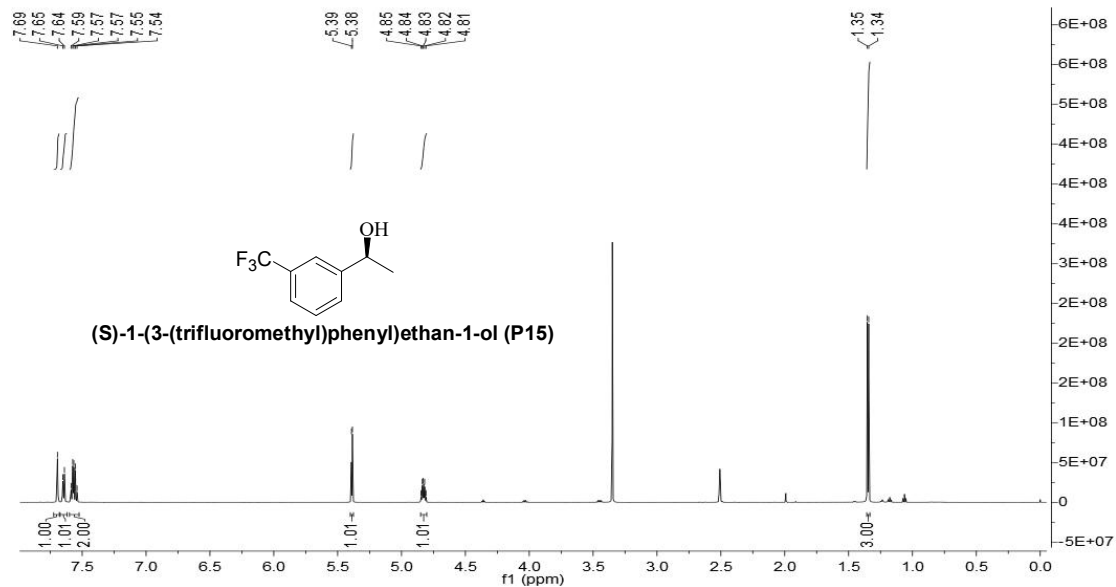

$^1\text{H}$  NMR (DMSO- $d_6$ , 600 MHz) of (S)-1-(3-(trifluoromethyl)phenyl)ethan-1-ol (P15)

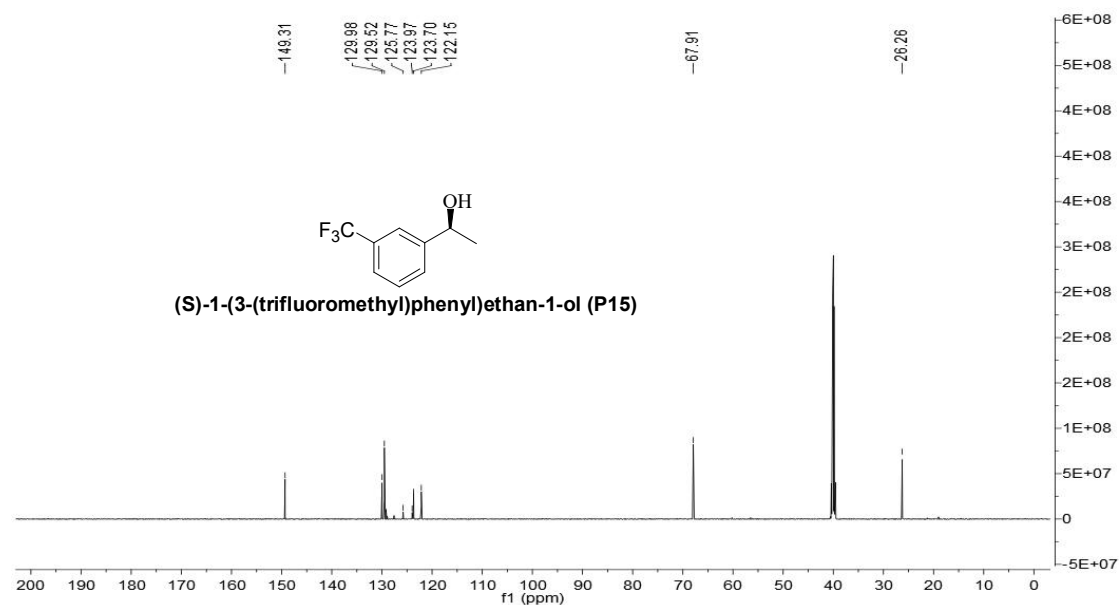

$^{13}\text{C}\{^1\text{H}\}$  NMR (DMSO- $d_6$ , 150 MHz) of (S)-1-(3-(trifluoromethyl)phenyl)ethan-1-ol (P15)

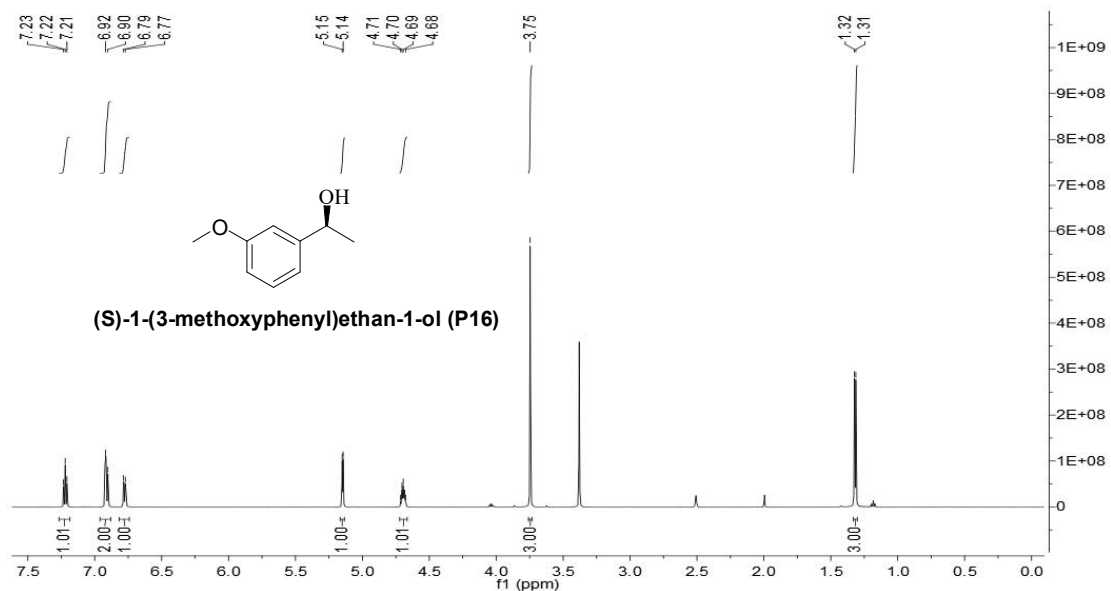

$^1\text{H}$  NMR (DMSO- $d_6$ , 600 MHz) of (S)-1-(3-methoxyphenyl)ethan-1-ol (**P16**)

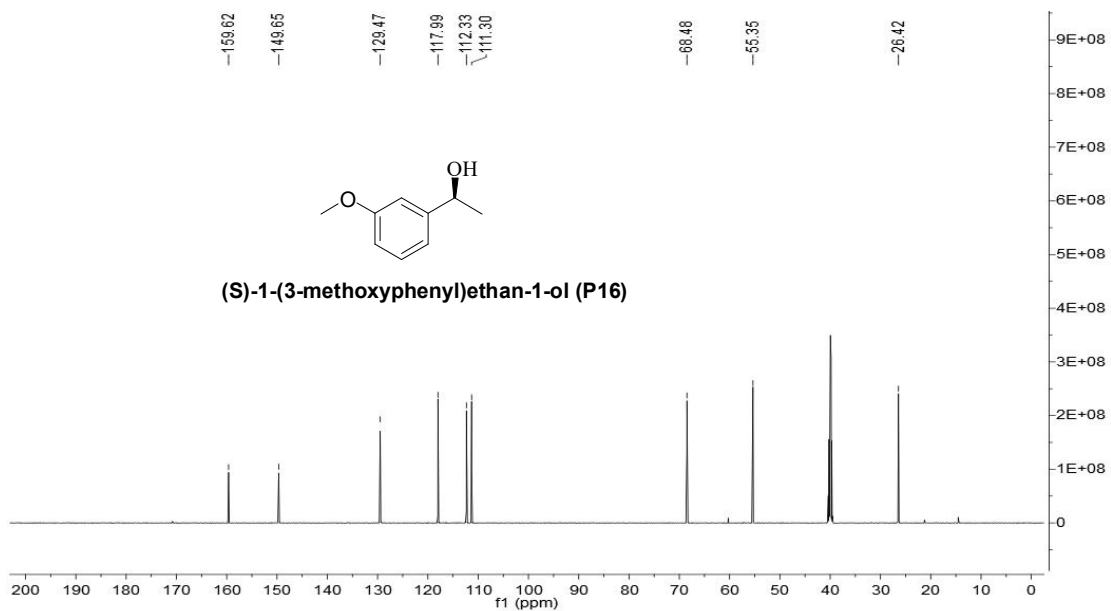

$^{13}\text{C}\{^1\text{H}\}$  NMR (DMSO- $d_6$ , 150 MHz) of (S)-1-(3-methoxyphenyl)ethan-1-ol (**P16**)



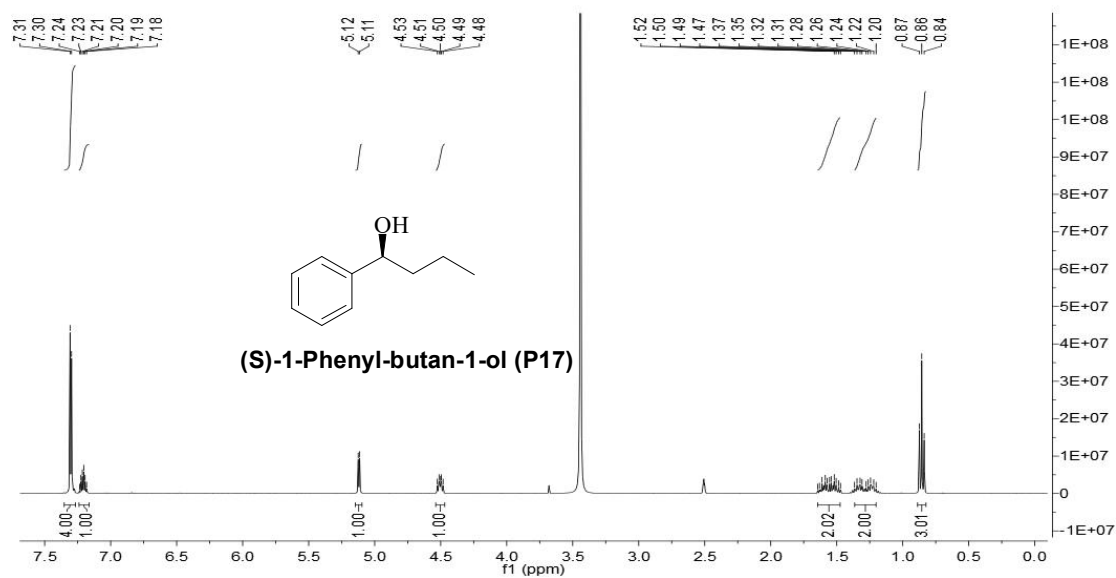

$^1\text{H}$  NMR (400 MHz,  $\text{DMSO}-d_6$ ) of (S)-1-Phenyl-butan-1-ol (P17)

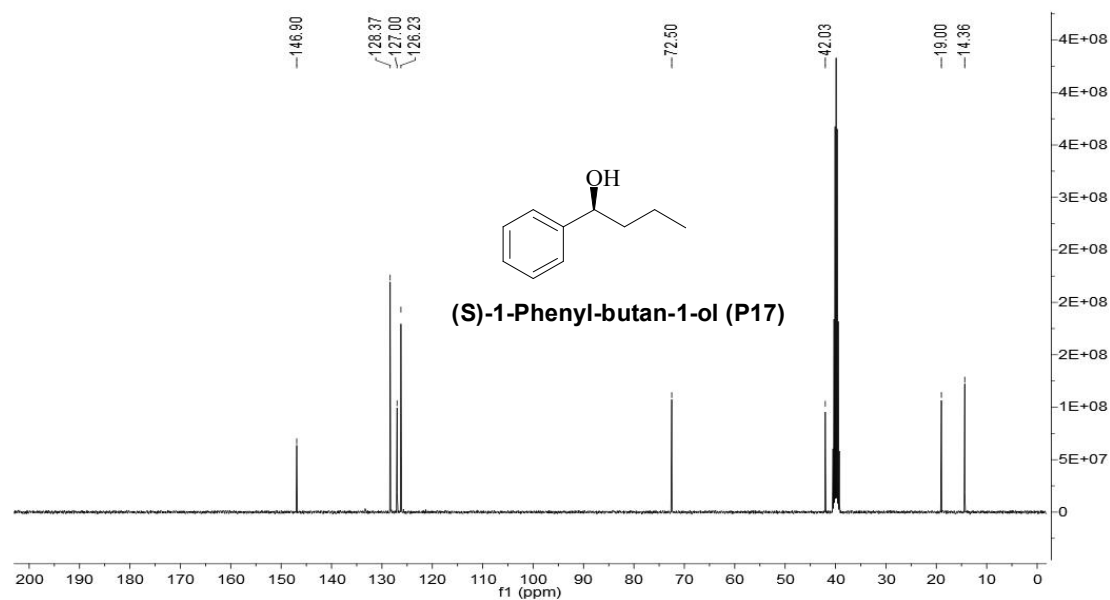

$^{13}\text{C}\{\text{H}\}$  NMR (100 MHz,  $\text{DMSO}-d_6$ ) of (S)-1-Phenyl-butan-1-ol (P17)

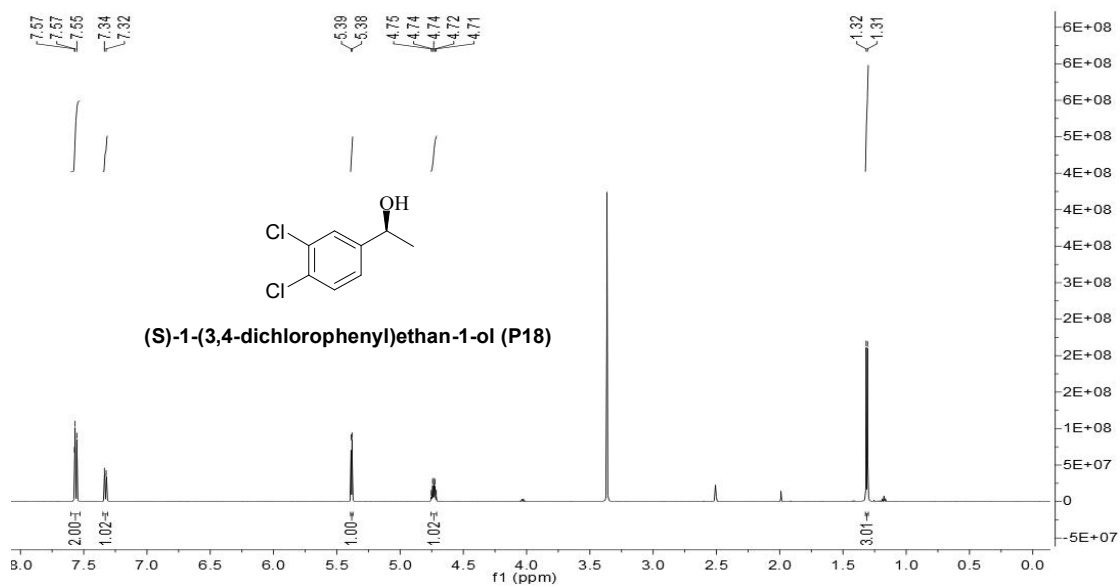

$^1\text{H}$  NMR (600 MHz,  $\text{DMSO-}d_6$ ) of (S)-1-(3,4-dichlorophenyl)ethan-1-ol (P18)

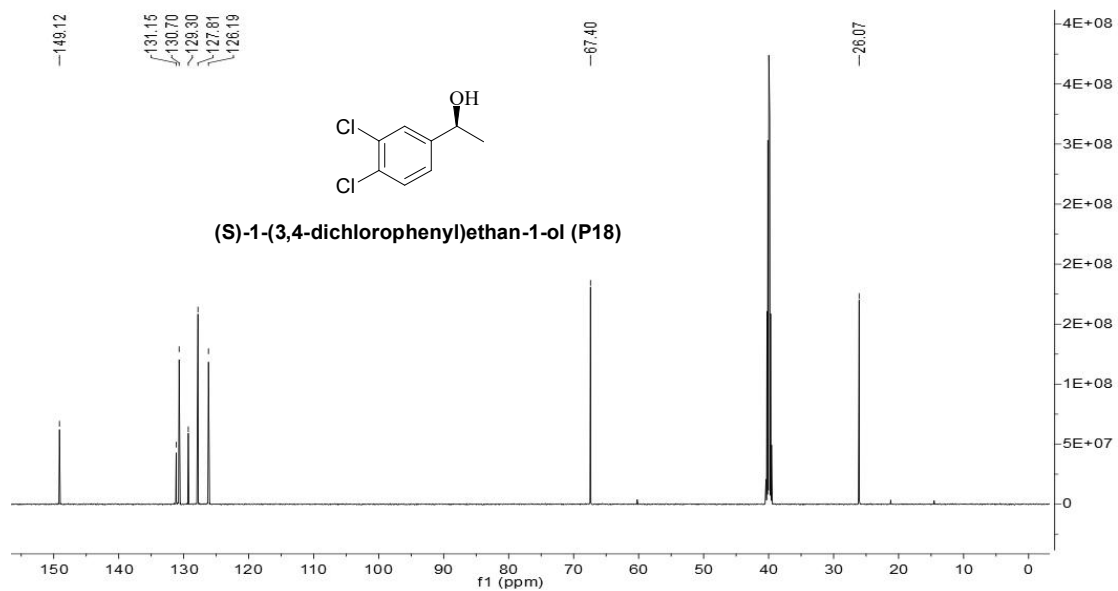

$^{13}\text{C}\{\text{H}\}$  NMR (150 MHz,  $\text{DMSO-}d_6$ ) of (S)-1-(3,4-dichlorophenyl)ethan-1-ol (P18)

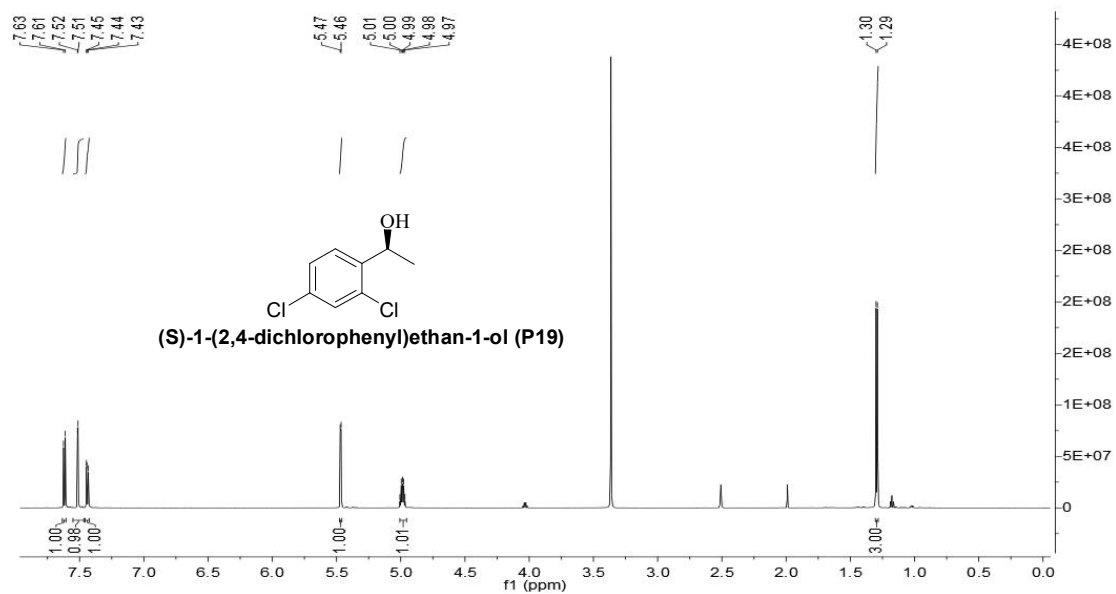

<sup>1</sup>H NMR (DMSO-*d*<sub>6</sub>, 600 MHz) of (S)-1-(2,4-dichlorophenyl)ethan-1-ol (P19)

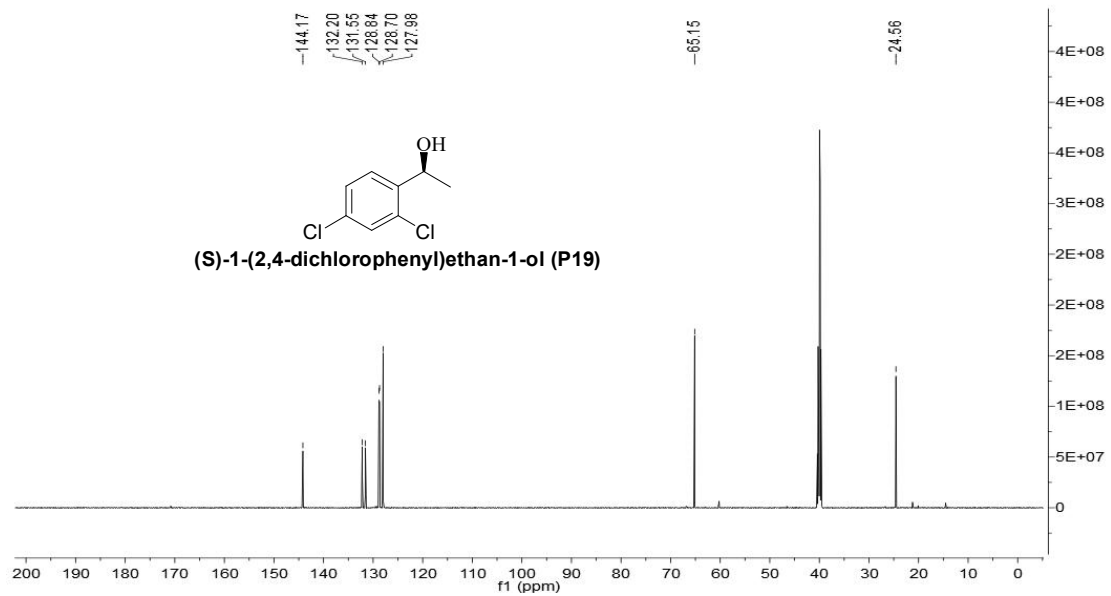

<sup>13</sup>C{H} NMR (DMSO-*d*<sub>6</sub>, 150 MHz) of (S)-1-(2,4-dichlorophenyl)ethan-1-ol (P19)

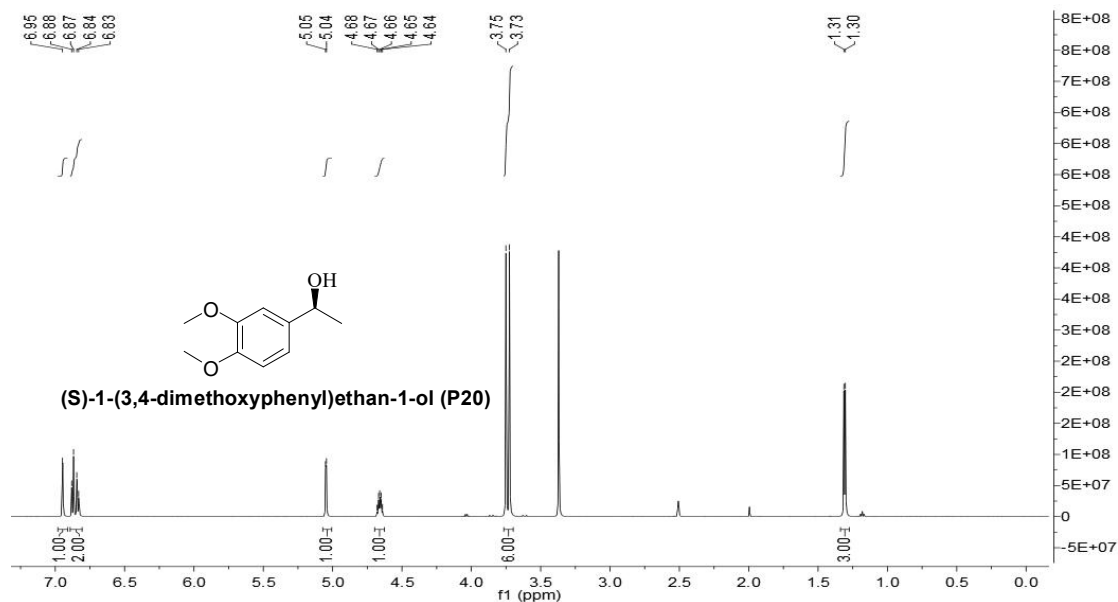

$^1\text{H}$  NMR (DMSO- $d_6$ , 600 MHz) of (S)-1-(3,4-dimethoxyphenyl)ethan-1-ol (P20)

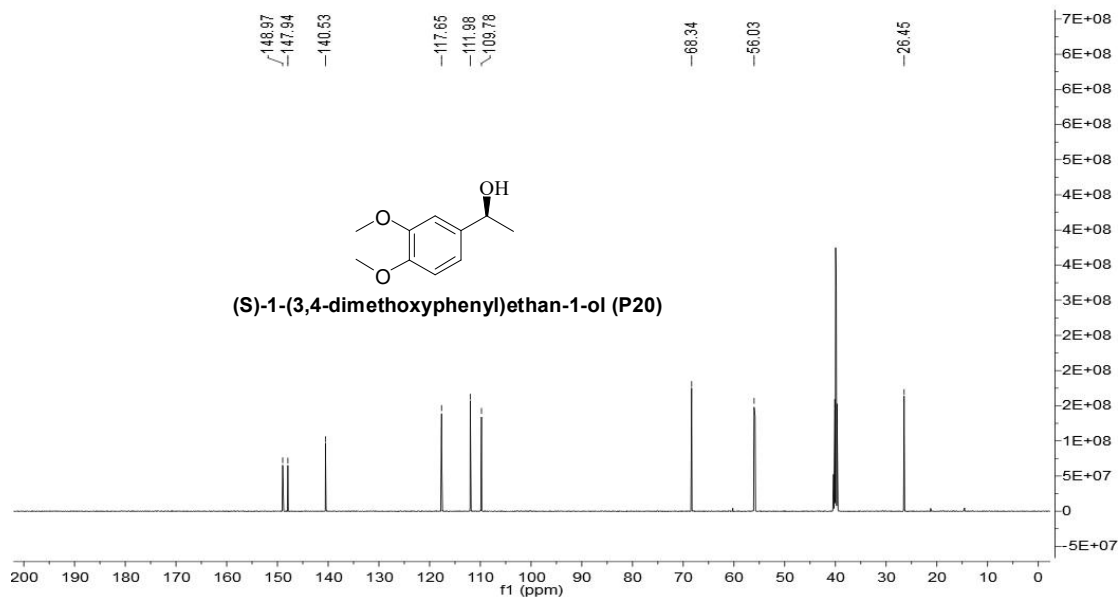

$^{13}\text{C}\{\text{H}\}$  NMR (DMSO- $d_6$ , 150 MHz) of (S)-1-(3,4-dimethoxyphenyl)ethan-1-ol (P20)

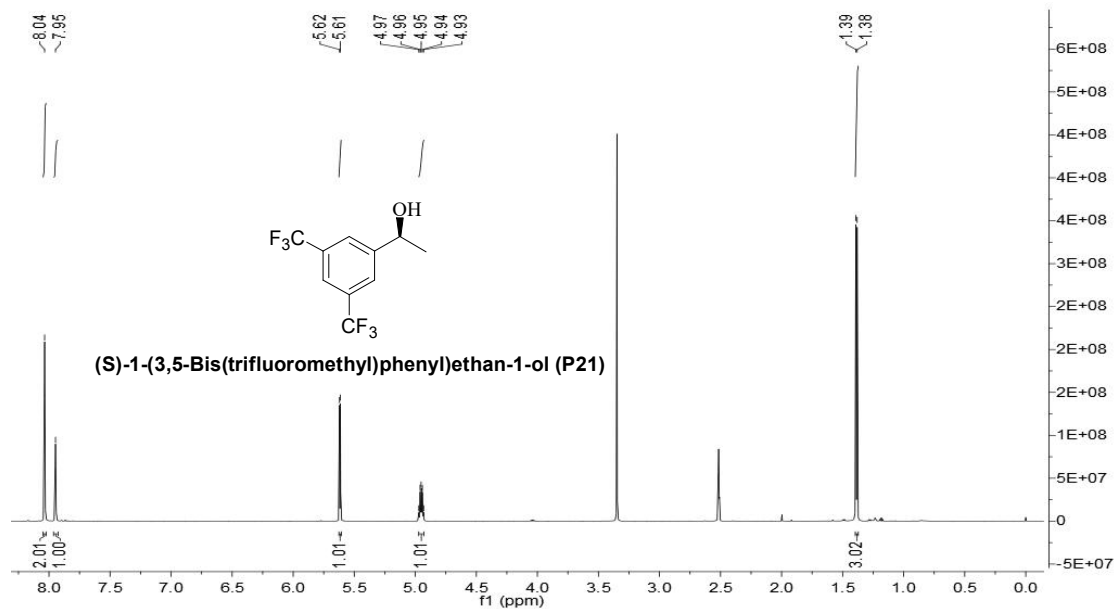

<sup>1</sup>H NMR (DMSO-*d*<sub>6</sub>, 600 MHz) of (S)-1-(3,5-Bis(trifluoromethyl)phenyl)ethan-1-ol (**P21**)

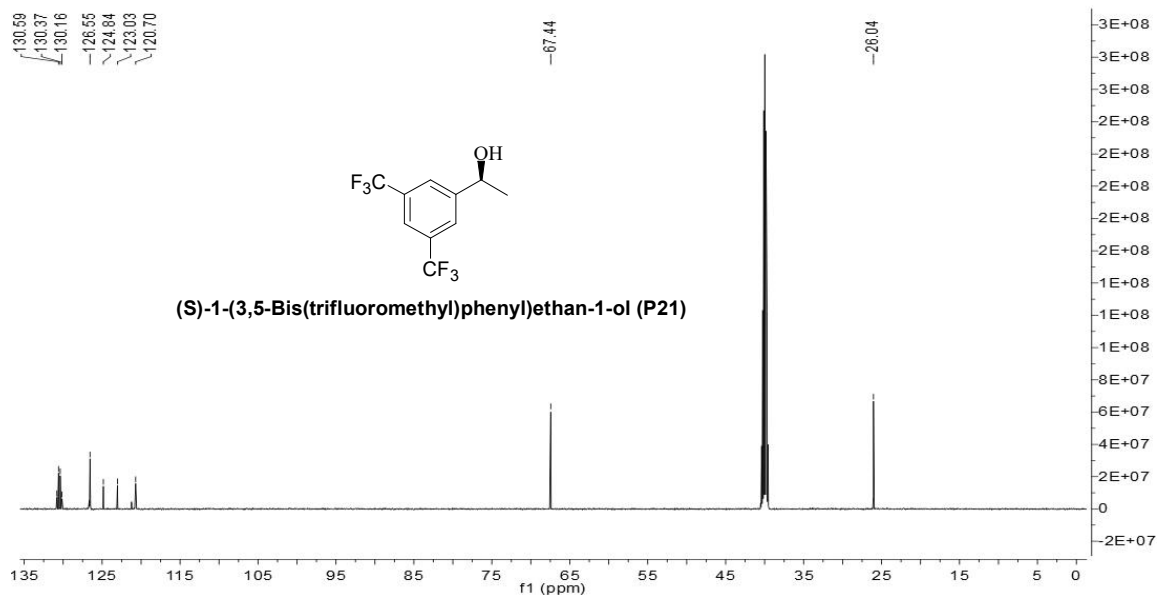

<sup>13</sup>C{<sup>1</sup>H} NMR (DMSO-*d*<sub>6</sub>, 150 MHz) of (S)-1-(3,5-bis(trifluoromethyl)phenyl)ethan-1-ol (**P21**)

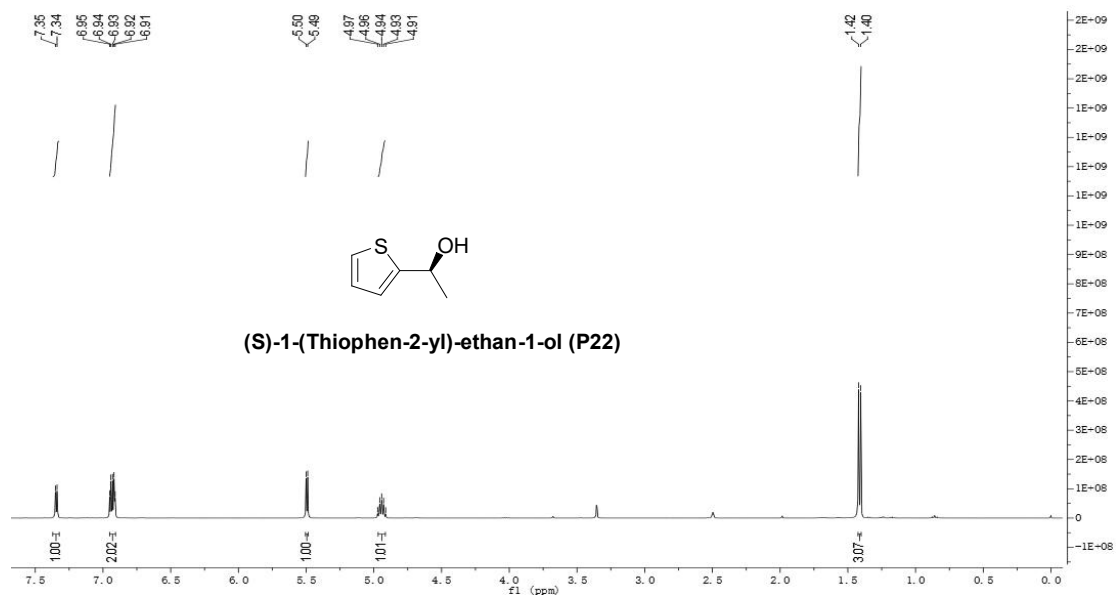

$^1\text{H}$  NMR (DMSO- $d_6$ , 400 MHz) of (S)-1-(Thiophen-2-yl)ethan-1-ol (P22)

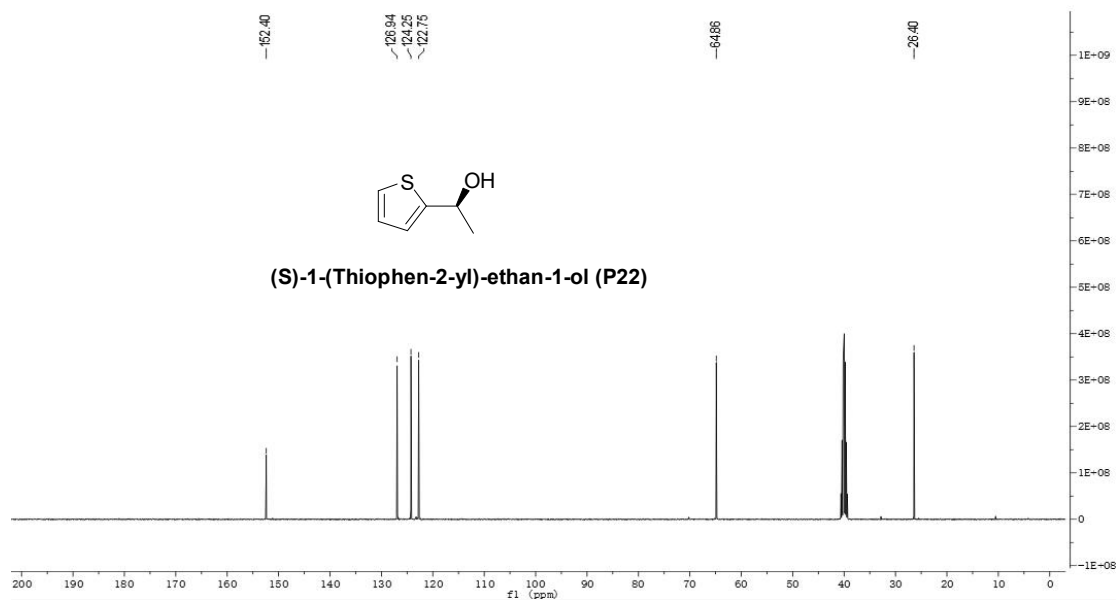

$^{13}\text{C}\{^1\text{H}\}$  NMR (DMSO- $d_6$ , 100 MHz) of (S)-1-(Thiophen-2-yl)ethan-1-ol (P22)

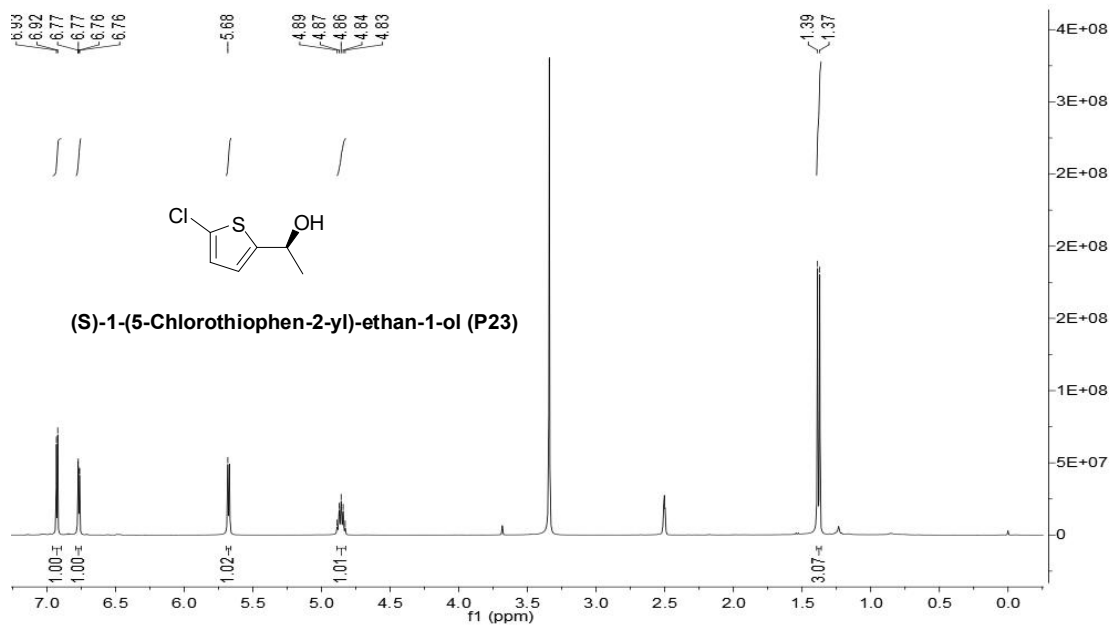

$^1\text{H}$  NMR (DMSO- $d_6$ , 400 MHz) of (S)-1-(5-Chlorothiophen-2-yl)-ethan-1-ol (P23)

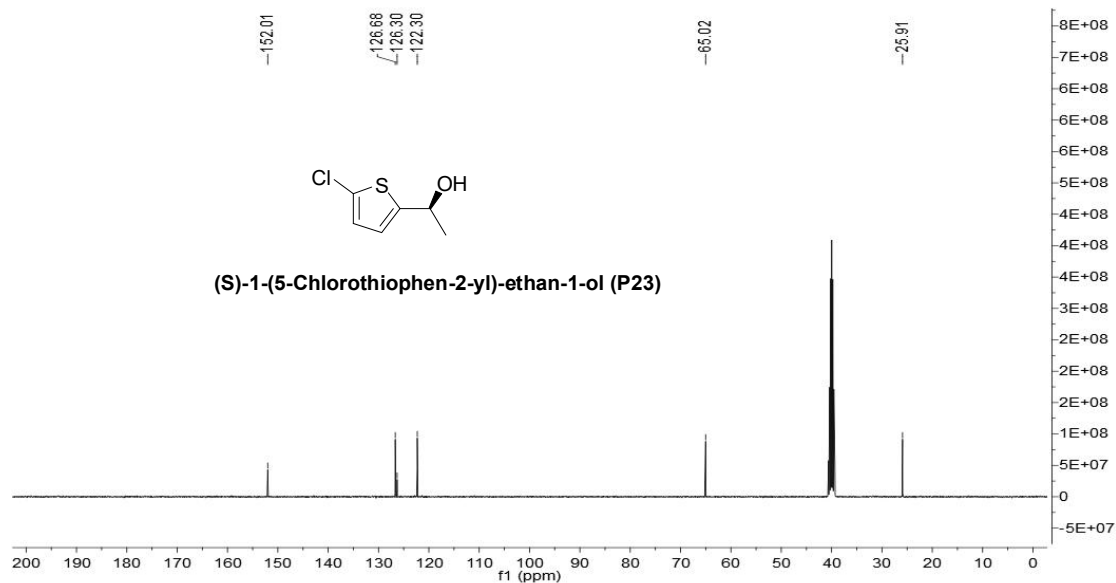

$^{13}\text{C}\{^1\text{H}\}$  NMR (DMSO- $d_6$ , 100 MHz) of (S)-1-(5-chlorothiophen-2-yl)-ethan-1-ol (P23)

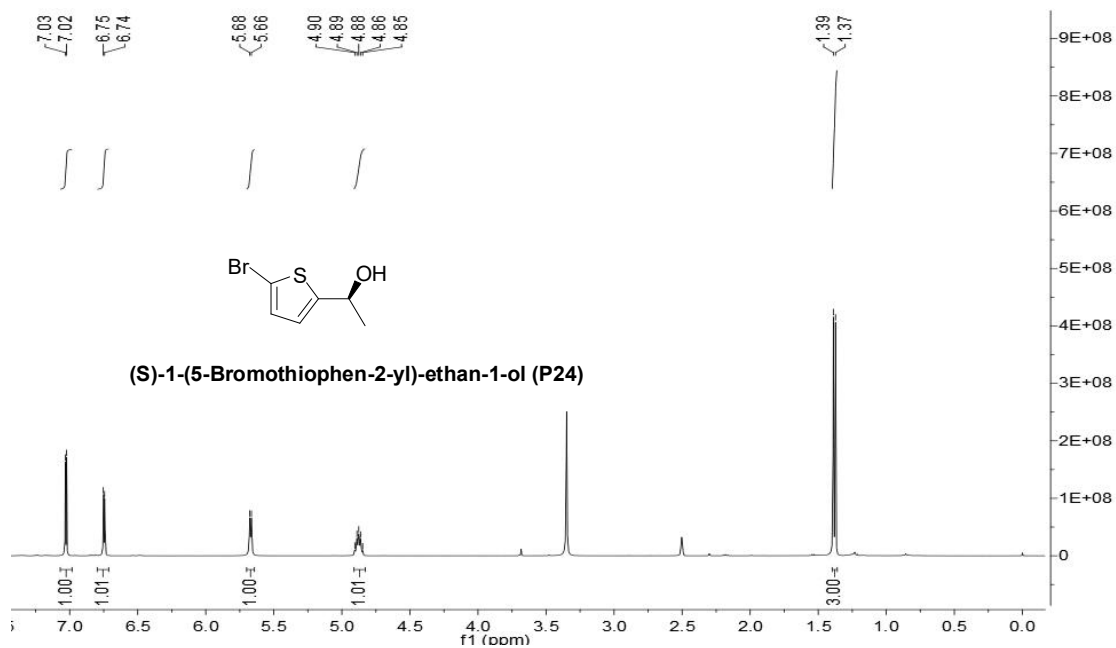

$^1\text{H}$  NMR (DMSO- $d_6$ , 400 MHz) of (S)-1-(5-Bromothiophen-2-yl)-ethan-1-ol (P24)

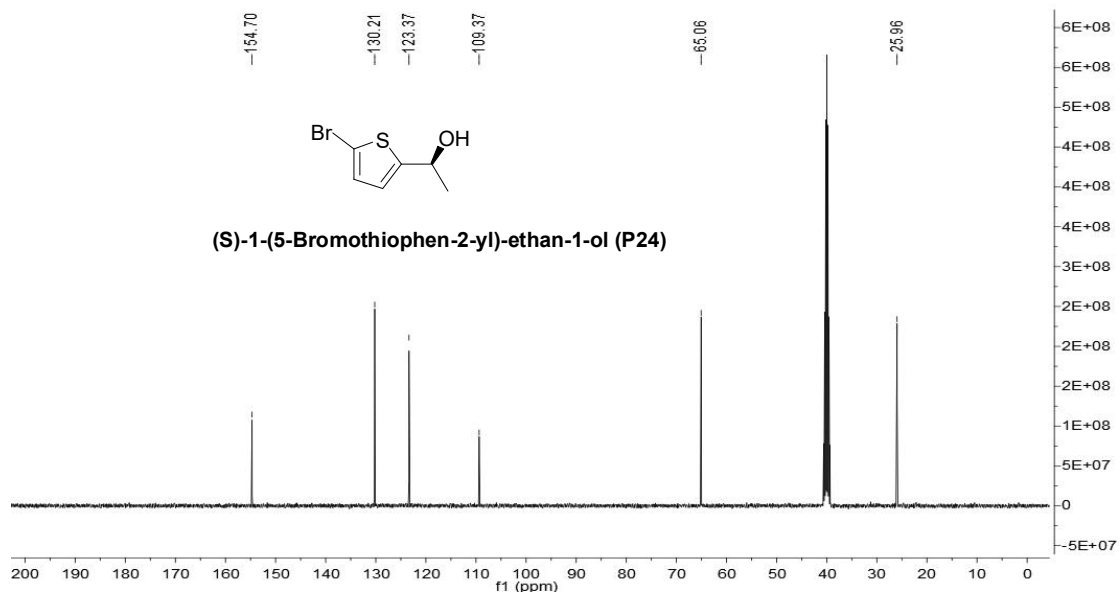

$^{13}\text{C}\{^1\text{H}\}$  NMR (DMSO- $d_6$ , 100 MHz) of (S)-1-(5-Bromothiophen-2-yl)-ethan-1-ol (P24)



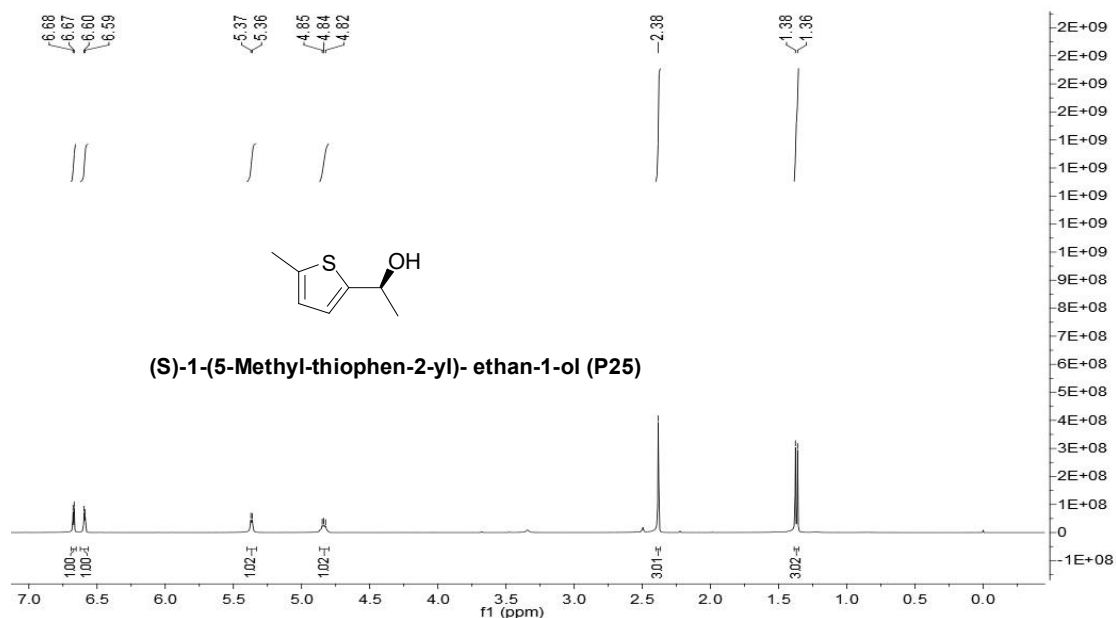

<sup>1</sup>H NMR (400 MHz, DMSO-*d*<sub>6</sub>) of (S)-1-(5-Methyl-thiophen-2-yl)-ethan-1-ol (P25)

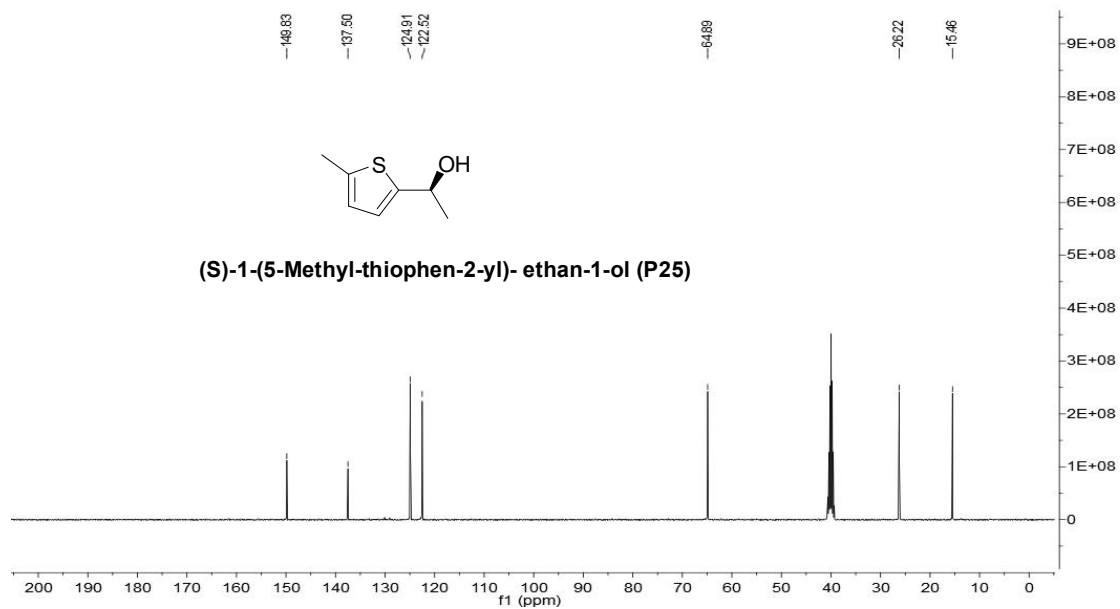

<sup>13</sup>C{H} NMR (100 MHz, DMSO-*d*<sub>6</sub>) of (S)-1-(5-Methyl-thiophen-2-yl)-ethan-1-ol (P25)

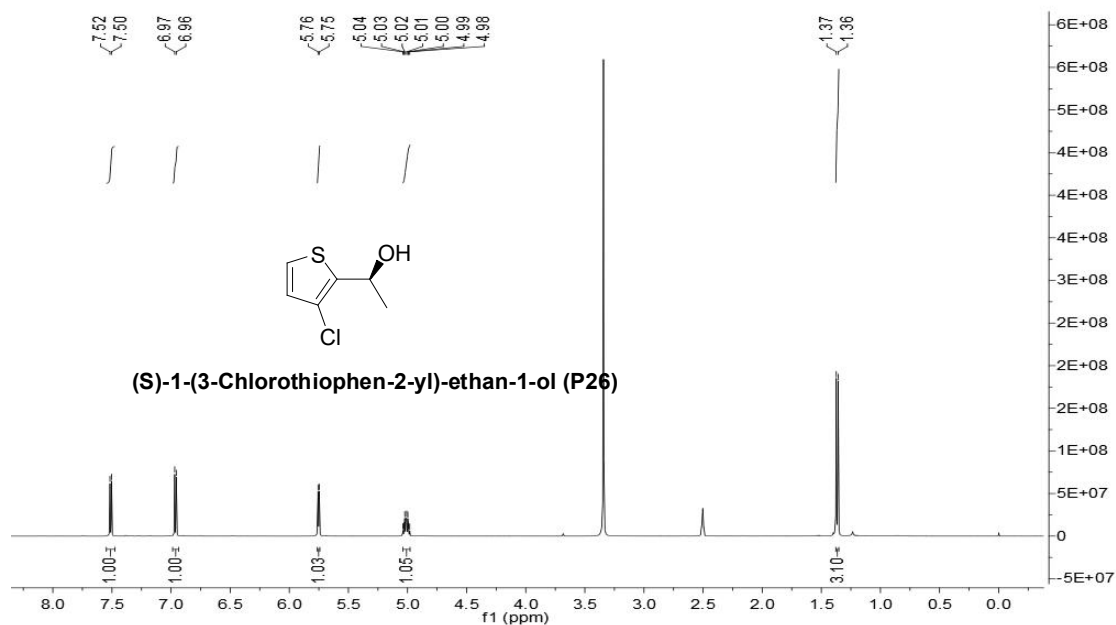

$^1\text{H}$  NMR (DMSO- $d_6$ , 400 MHz) of (S)-1-(3-Chlorothiophen-2-yl)-ethan-1-ol (P26)

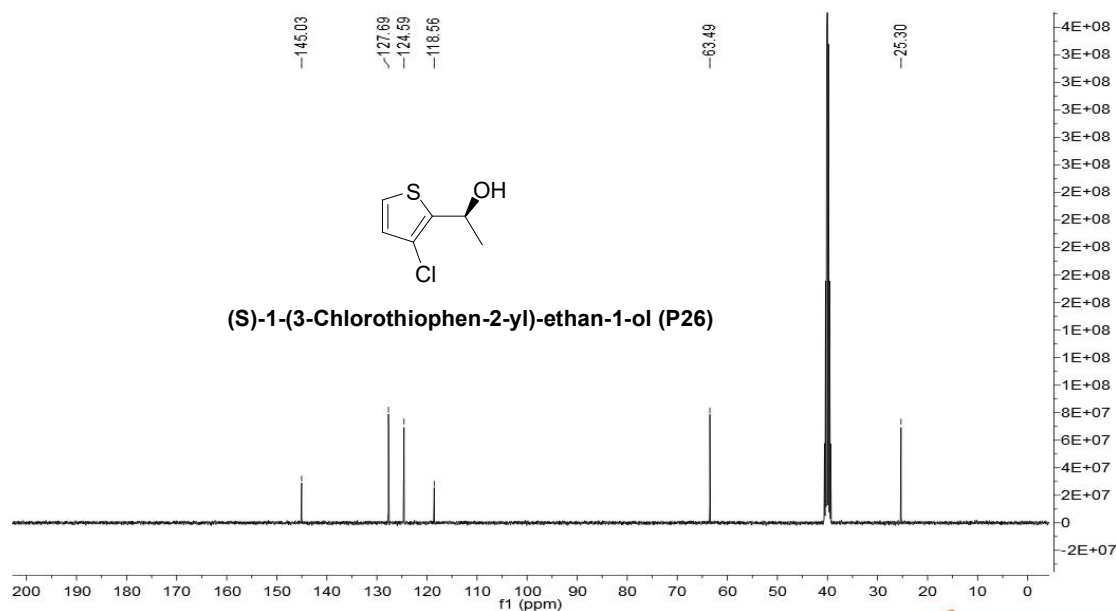

$^{13}\text{C}\{^1\text{H}\}$  NMR (DMSO- $d_6$ , 100 MHz) of (S)-1-(3-Chlorothiophen-2-yl)-ethan-1-ol (P26)

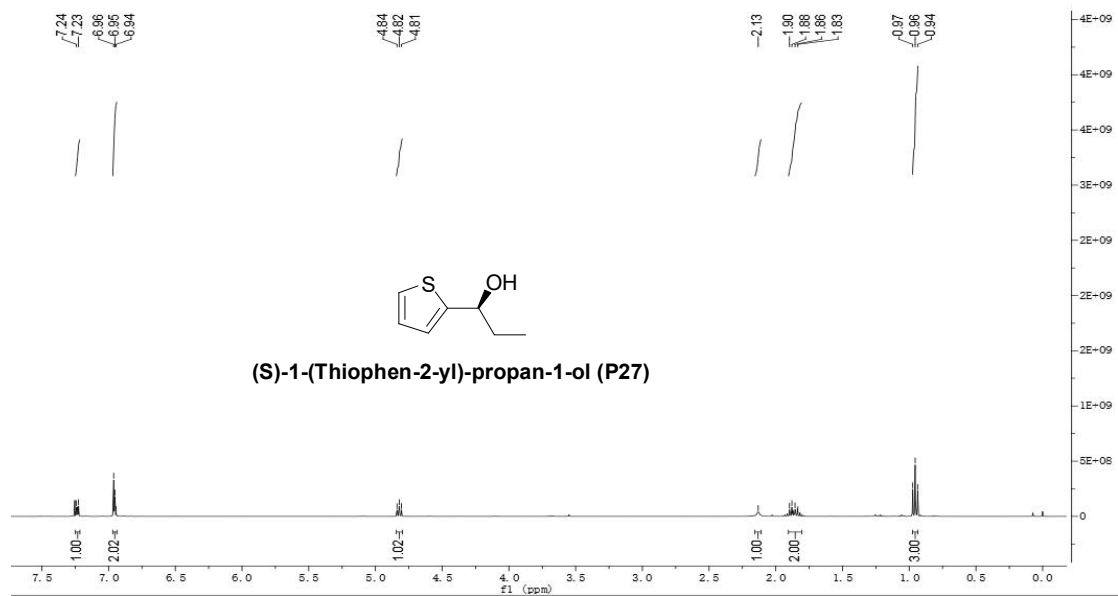

$^1\text{H}$  NMR ( $\text{CDCl}_3$ , 400 MHz) of (S)-1-(Thiophen-2-yl)propan-1-ol (**P27**)

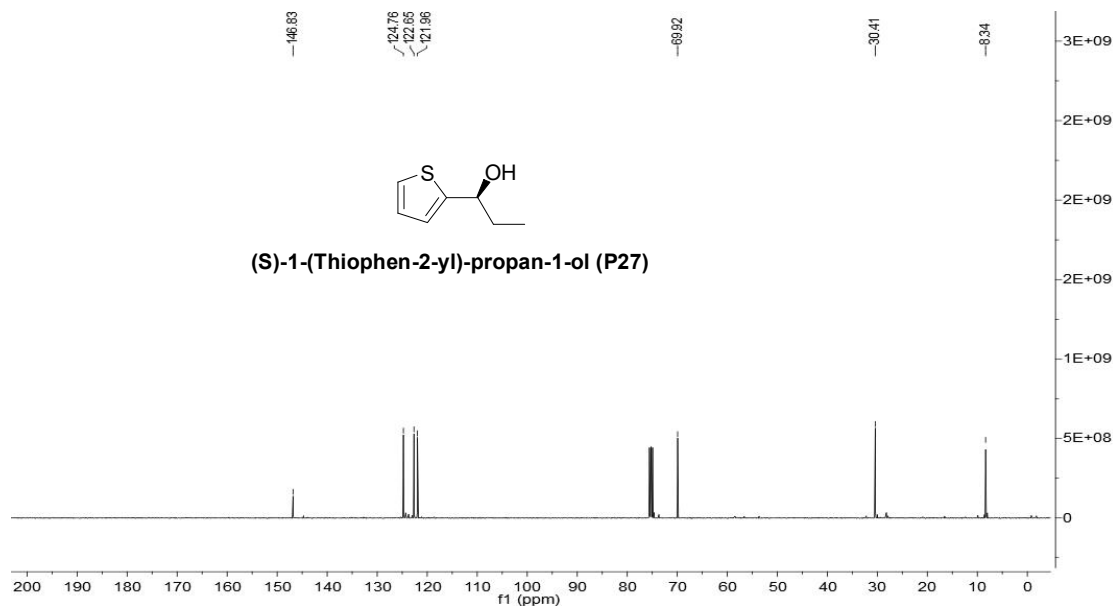

$^{13}\text{C}\{\text{H}\}$  NMR ( $\text{CDCl}_3$ , 100 MHz) of (S)-1-(Thiophen-2-yl)propan-1-ol (**P27**)

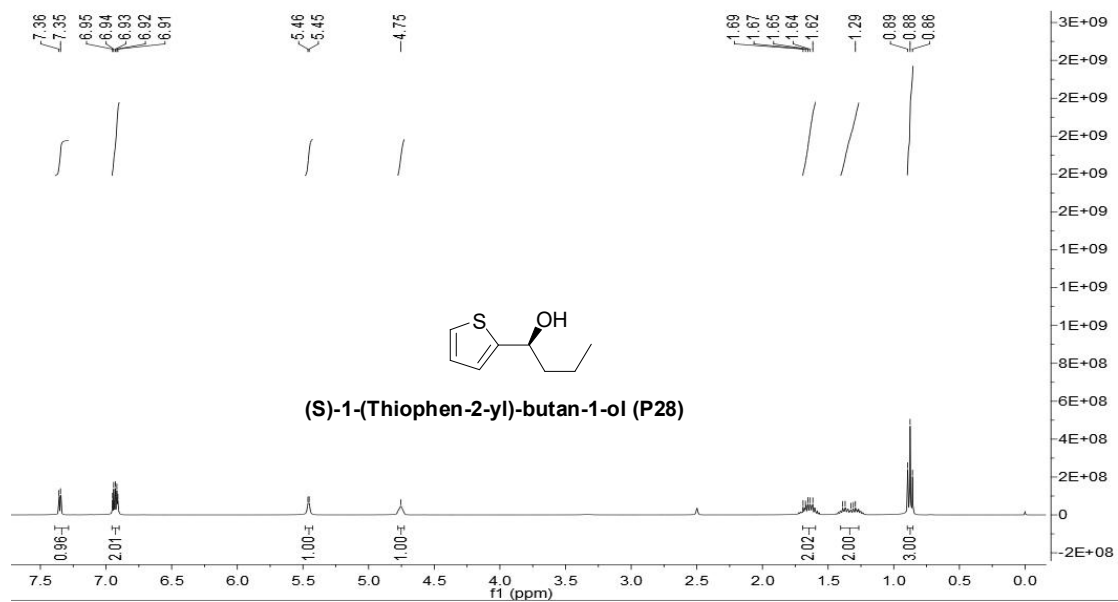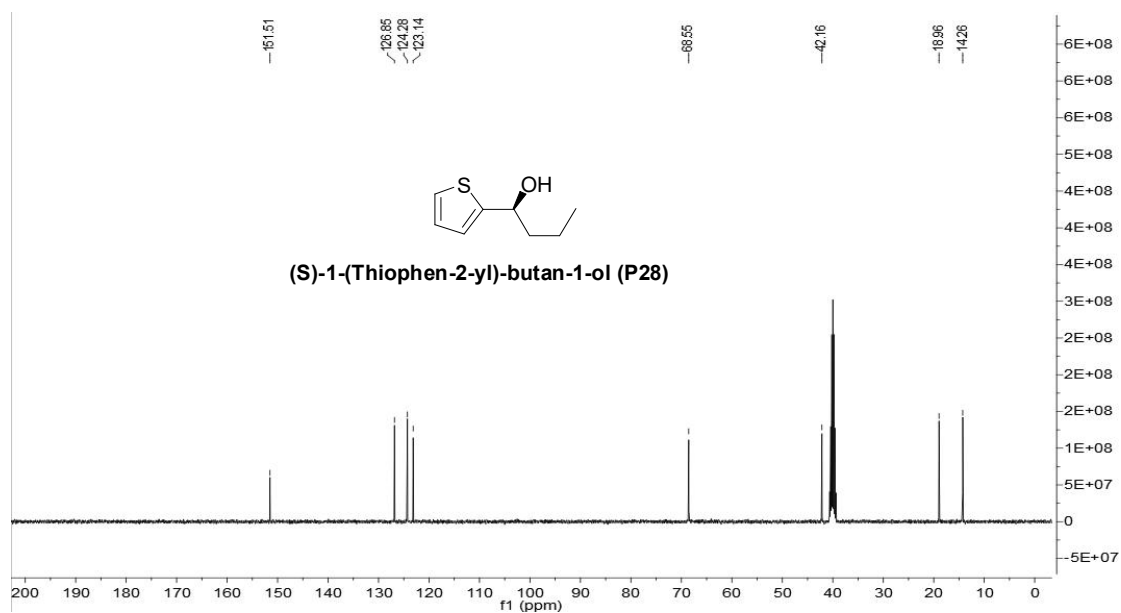

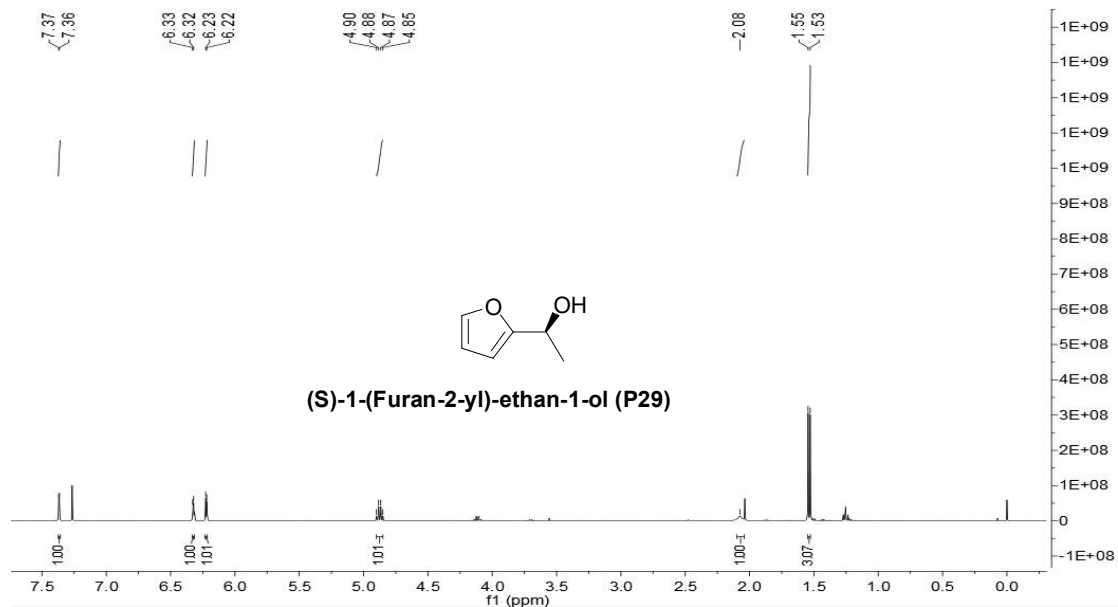

<sup>1</sup>H NMR (CDCl<sub>3</sub>, 400 MHz) of (S)-1-(Furan-2-yl)ethan-1-ol (P29)

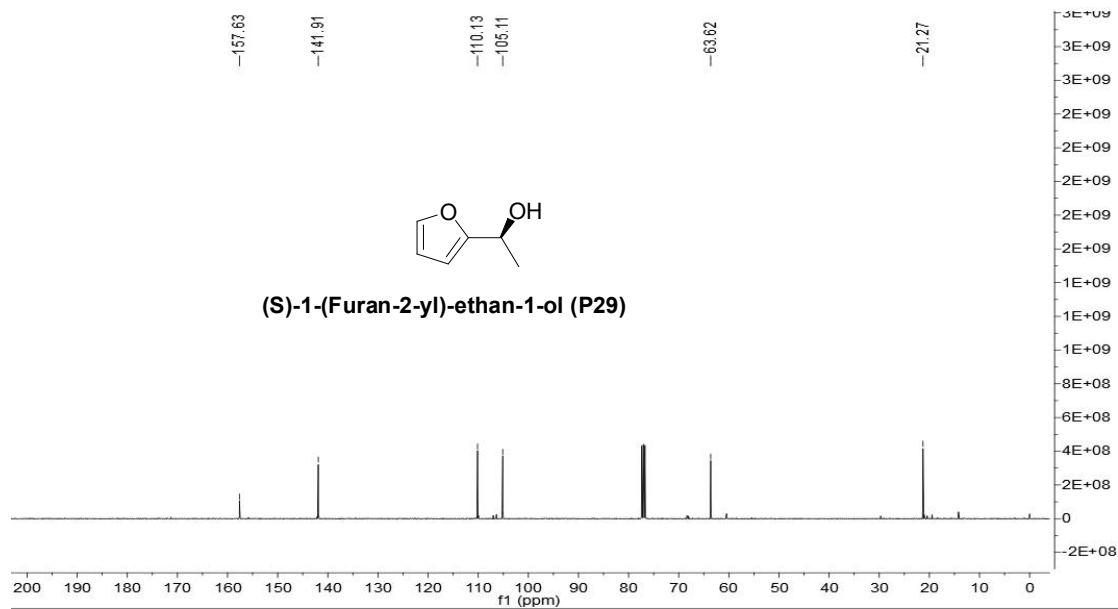

<sup>13</sup>C NMR (CDCl<sub>3</sub>, 100 MHz) of (S)-1-(Furan-2-yl)ethan-1-ol (P29)

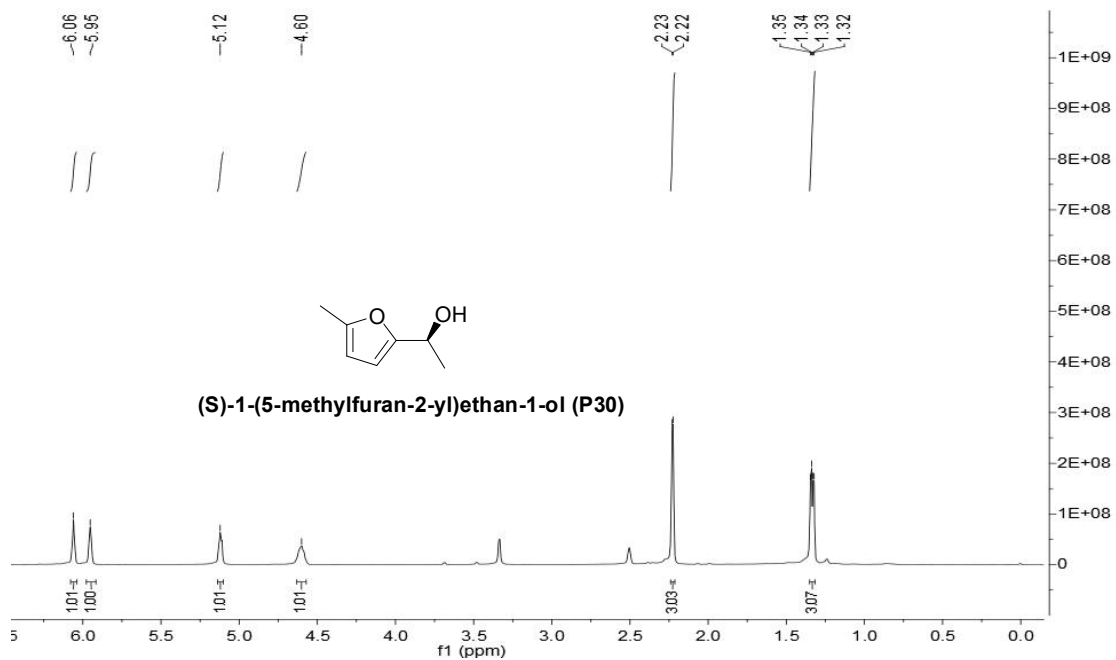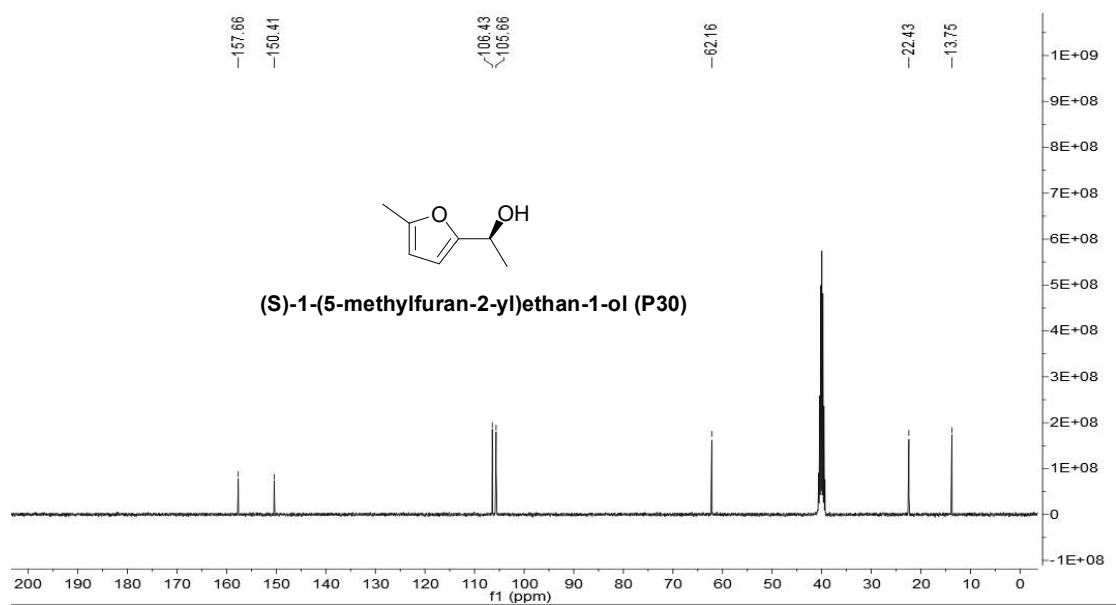

<sup>13</sup>C{H} NMR (DMSO-*d*<sub>6</sub>, 100 MHz) of (S)-1-(5-methylfuran-2-yl)ethan-1-ol (P30)

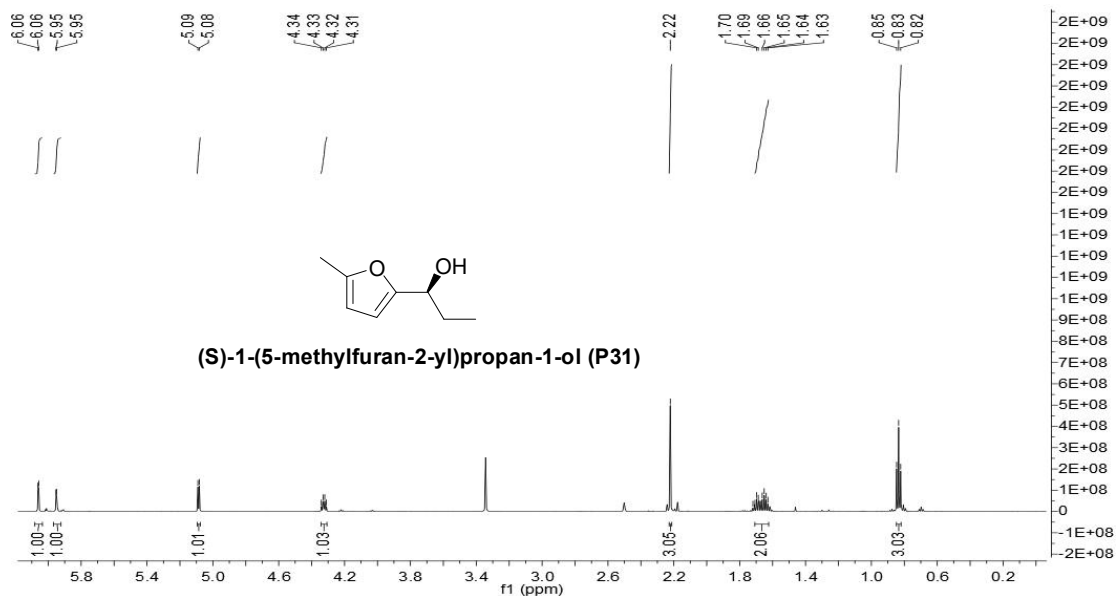

<sup>1</sup>H NMR (DMSO-*d*<sub>6</sub>, 600 MHz) of (S)-1-(5-methylfuran-2-yl)propan-1-ol (P31)

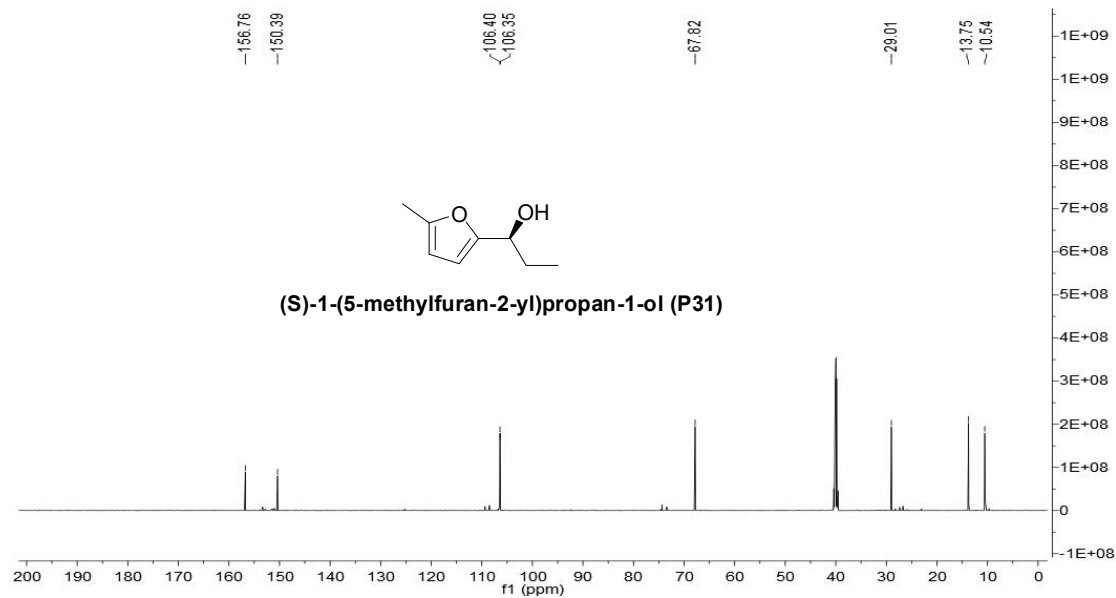

<sup>13</sup>C NMR (DMSO-*d*<sub>6</sub>, 150 MHz) of (S)-1-(5-methylfuran-2-yl)propan-1-ol (P31)

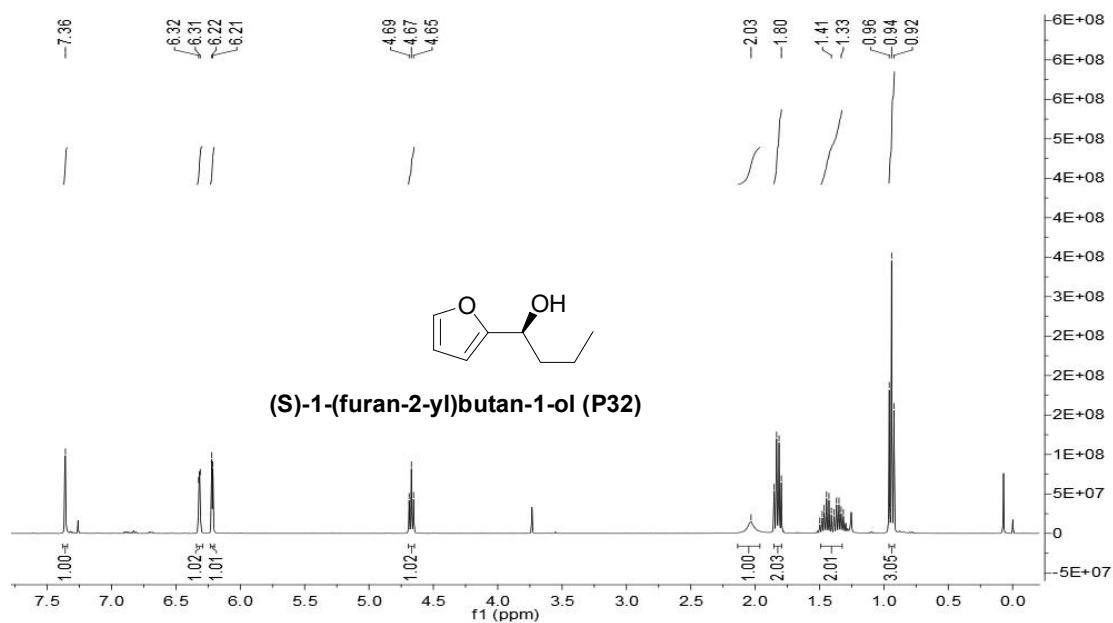

<sup>1</sup>H NMR (CDCl<sub>3</sub>, 400 MHz) of (S)-1-(furan-2-yl)butan-1-ol (P32)

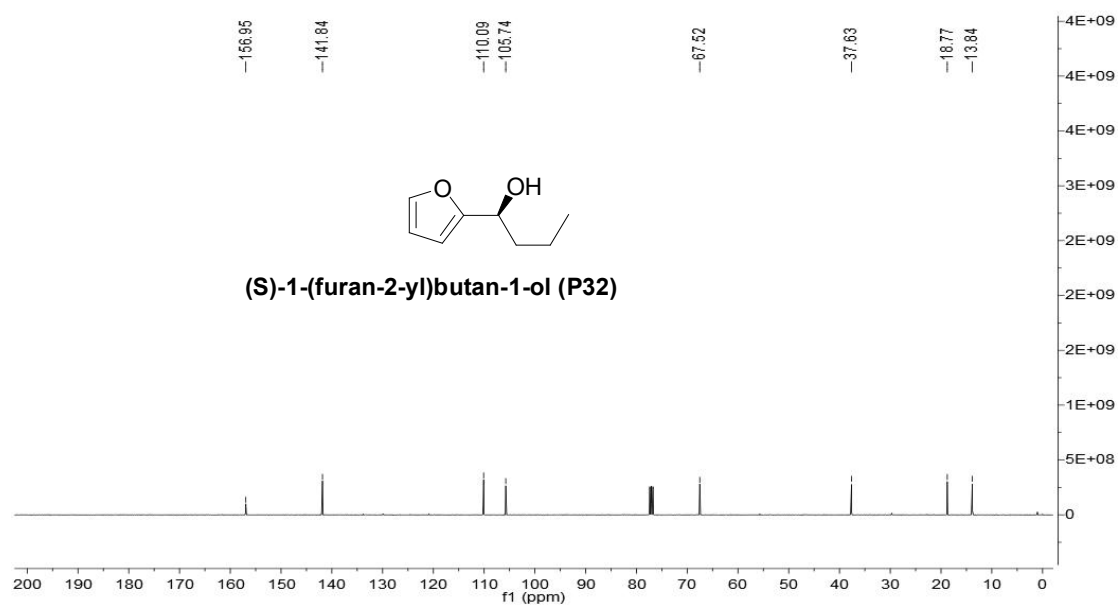

<sup>13</sup>C NMR (CDCl<sub>3</sub>, 100 MHz) of (S)-1-(furan-2-yl)butan-1-ol (P32)



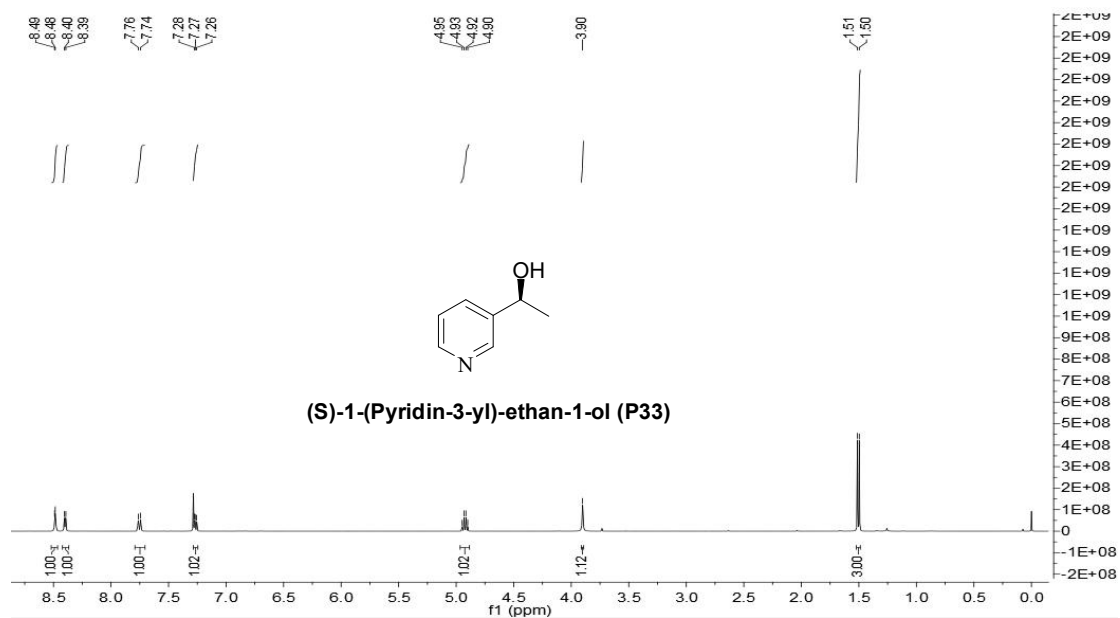

$^1\text{H}$  NMR ( $\text{CDCl}_3$ , 400 MHz) of (S)-1-(Pyridin-3-yl)-ethan-1-ol (P33)

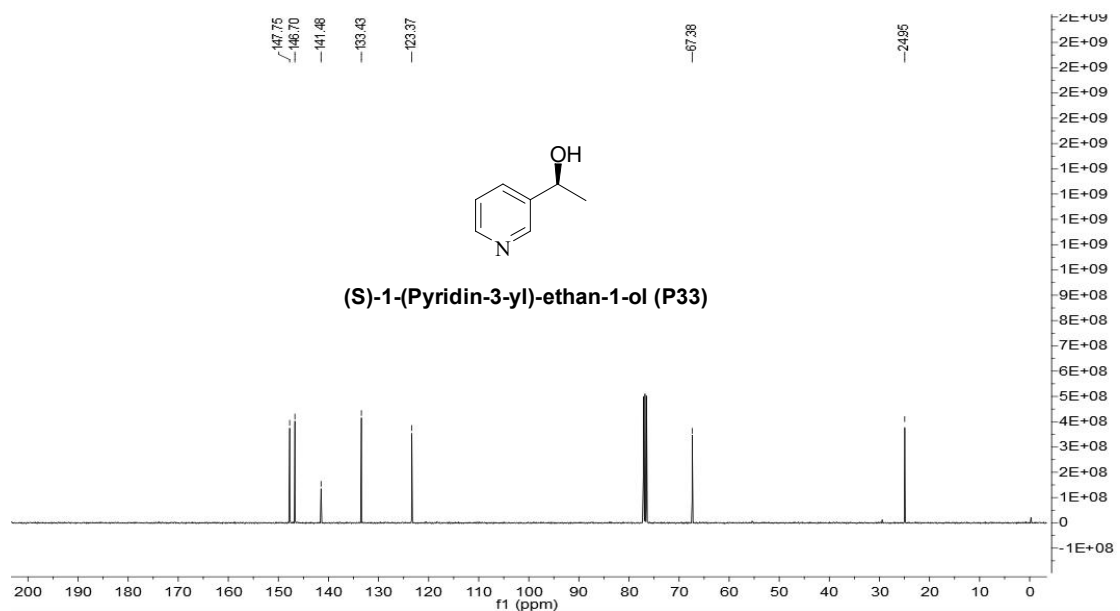

$^{13}\text{C}\{^1\text{H}\}$  NMR ( $\text{CDCl}_3$ , 100 MHz) of (S)-1-(Pyridin-3-yl)-ethan-1-ol (P33)

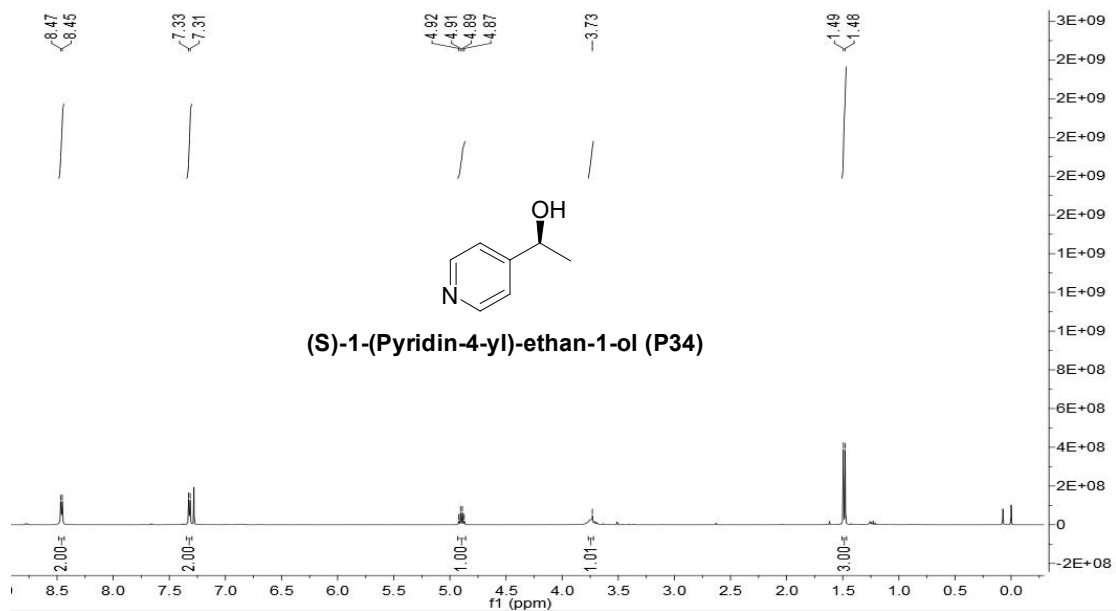

<sup>1</sup>H NMR (CDCl<sub>3</sub>, 400 MHz) of (S)-1-(Pyridin-4-yl)-ethan-1-ol (P34)

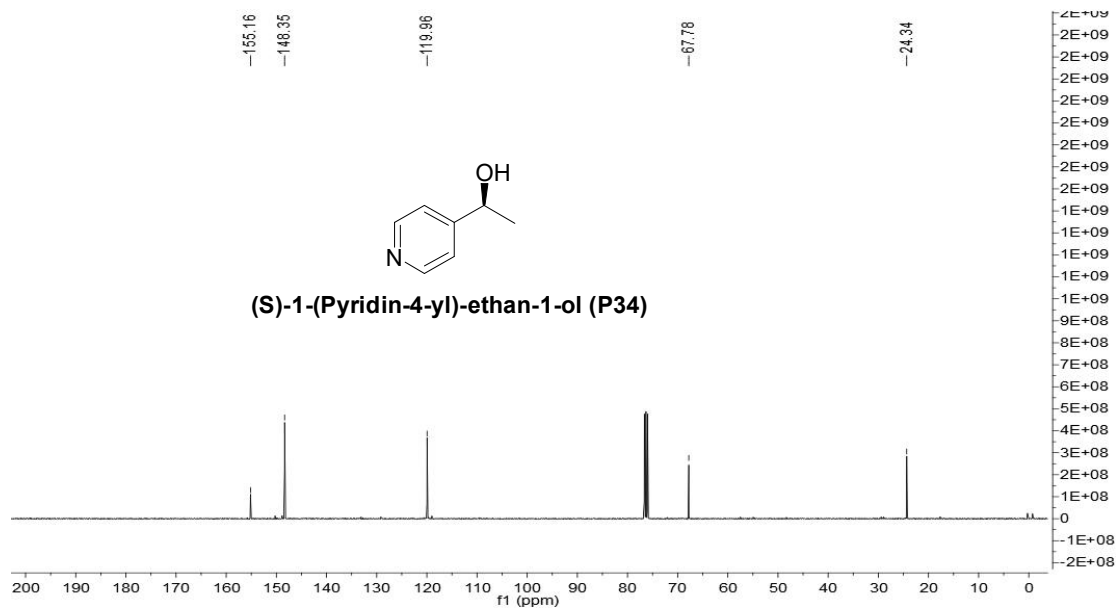

<sup>13</sup>C{H} NMR (CDCl<sub>3</sub>, 100 MHz) of (S)-1-(Pyridin-4-yl)-ethan-1-ol (P34)

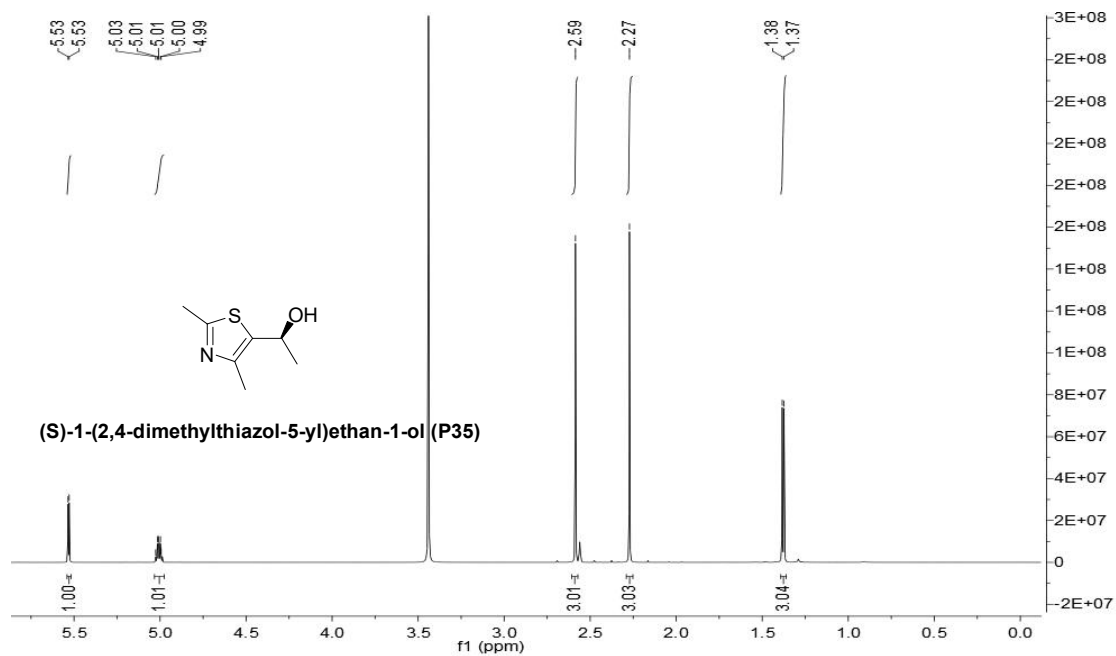

$^1\text{H}$  NMR (DMSO- $d_6$ , 600 MHz) of (S)-1-(2,4-dimethylthiazol-5-yl)ethan-1-ol (P35)

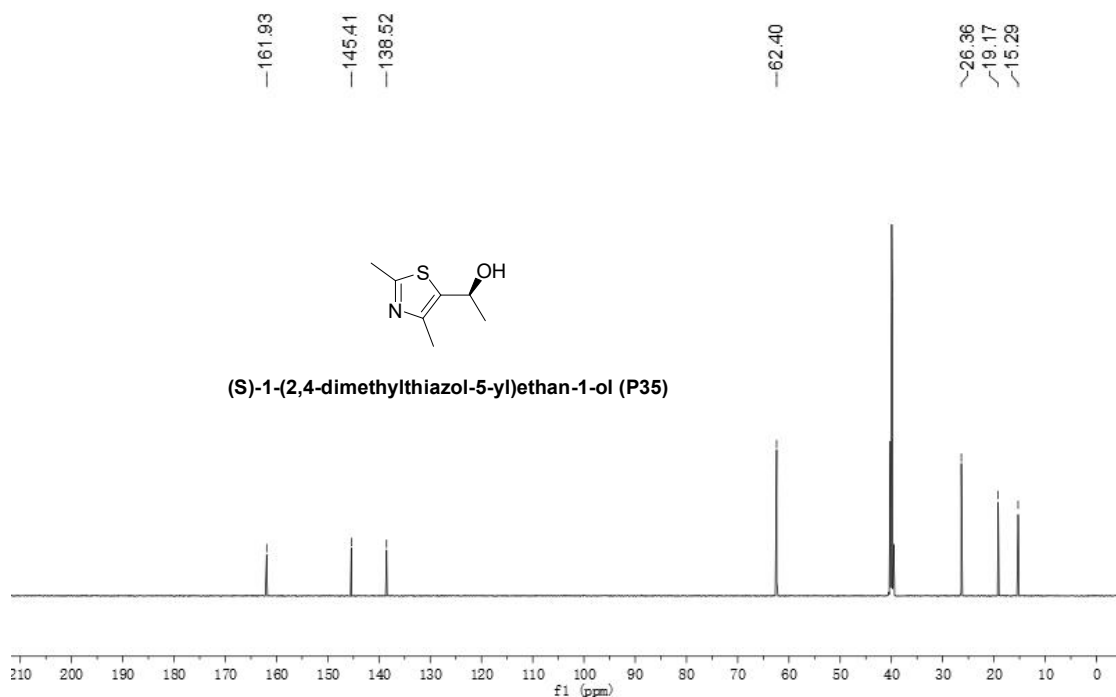

$^{13}\text{C}\{^1\text{H}\}$  NMR (DMSO- $d_6$ , 150 MHz) of (S)-1-(2,4-dimethylthiazol-5-yl)ethan-1-ol (P35)

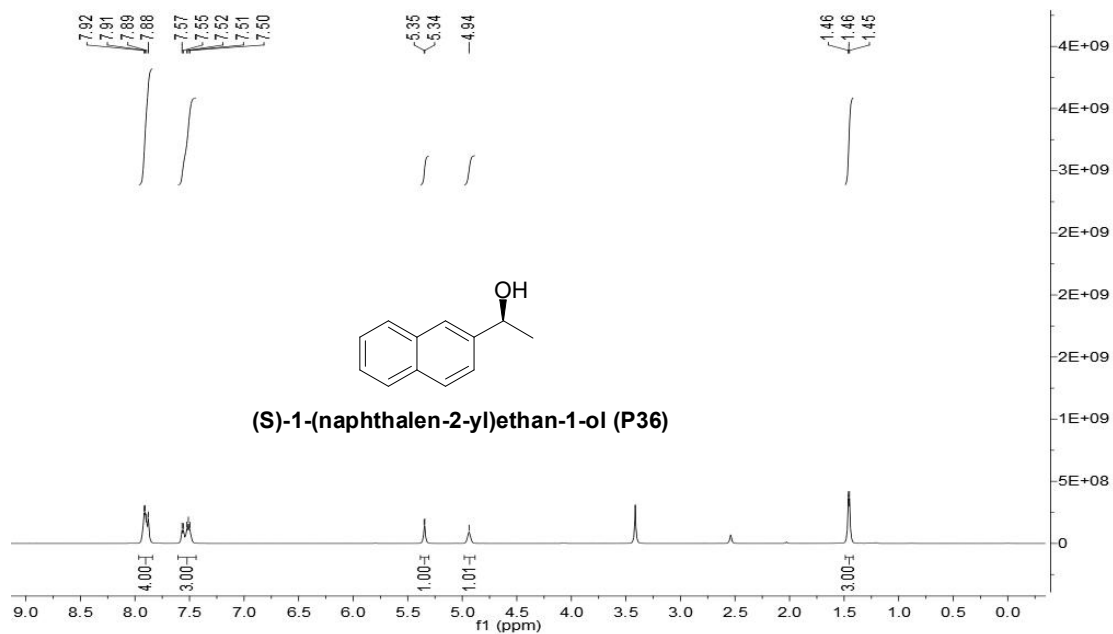

$^1\text{H}$  NMR (DMSO- $d_6$ , 600 MHz) of (S)-1-(naphthalen-2-yl)ethan-1-ol (P36)

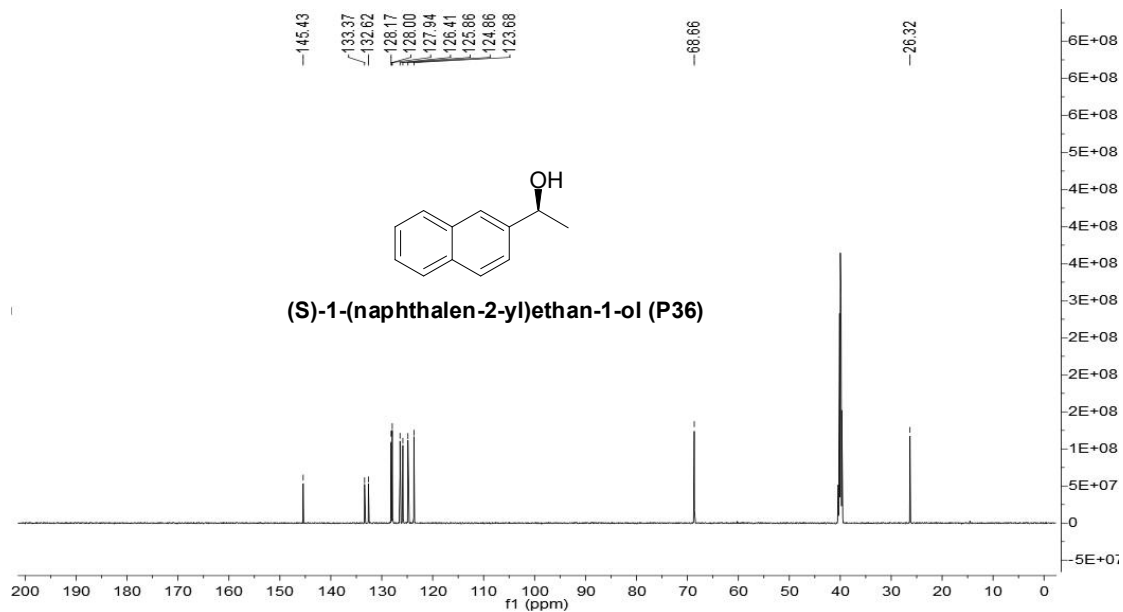

$^{13}\text{C}\{\text{H}\}$  NMR (DMSO- $d_6$ , 150 MHz) of (S)-1-(naphthalen-2-yl)ethan-1-ol (P36)

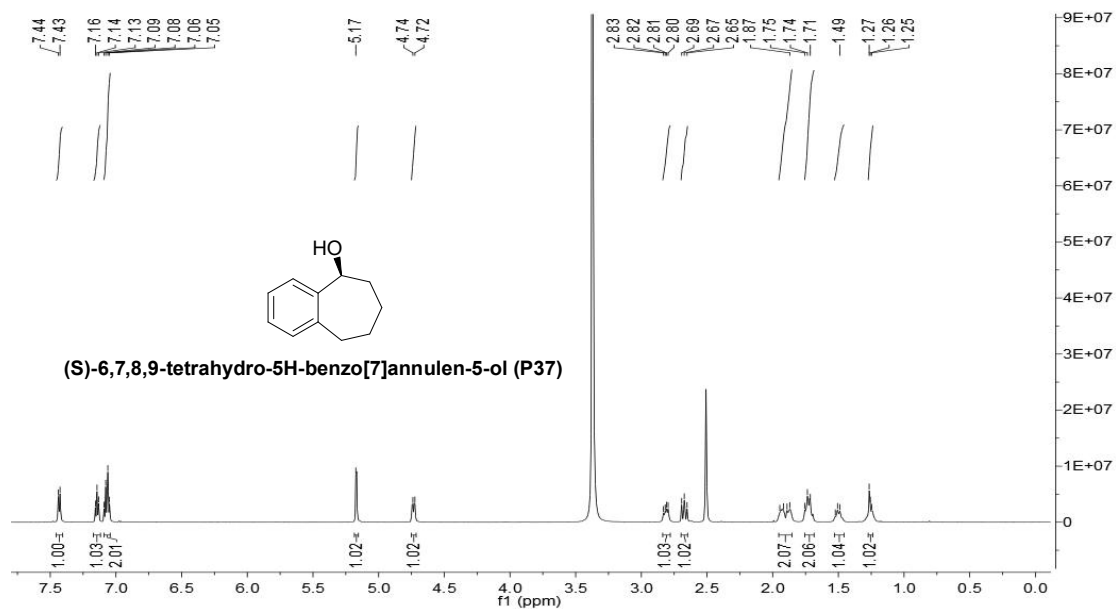

<sup>1</sup>H NMR (DMSO-*d*<sub>6</sub>, 600 MHz) of (S)-6,7,8,9-tetrahydro-5H-benzo[7]annulen-5-ol (P37)

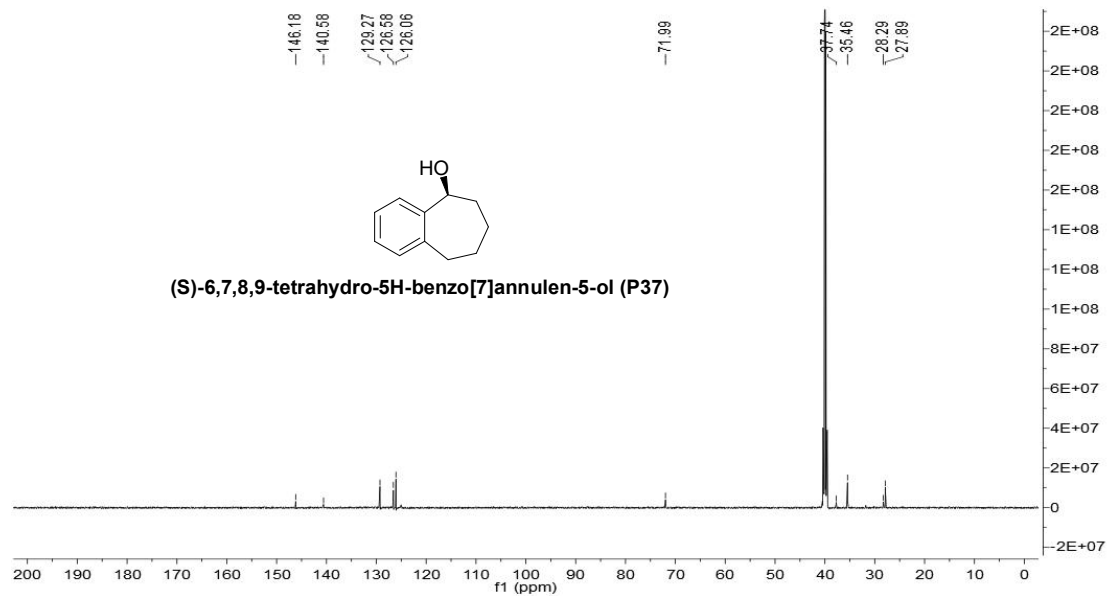

<sup>13</sup>C{H} NMR (DMSO-*d*<sub>6</sub>, 150 MHz) of (S)-6,7,8,9-tetrahydro-5H-benzo[7]annulen-5-ol (P37)

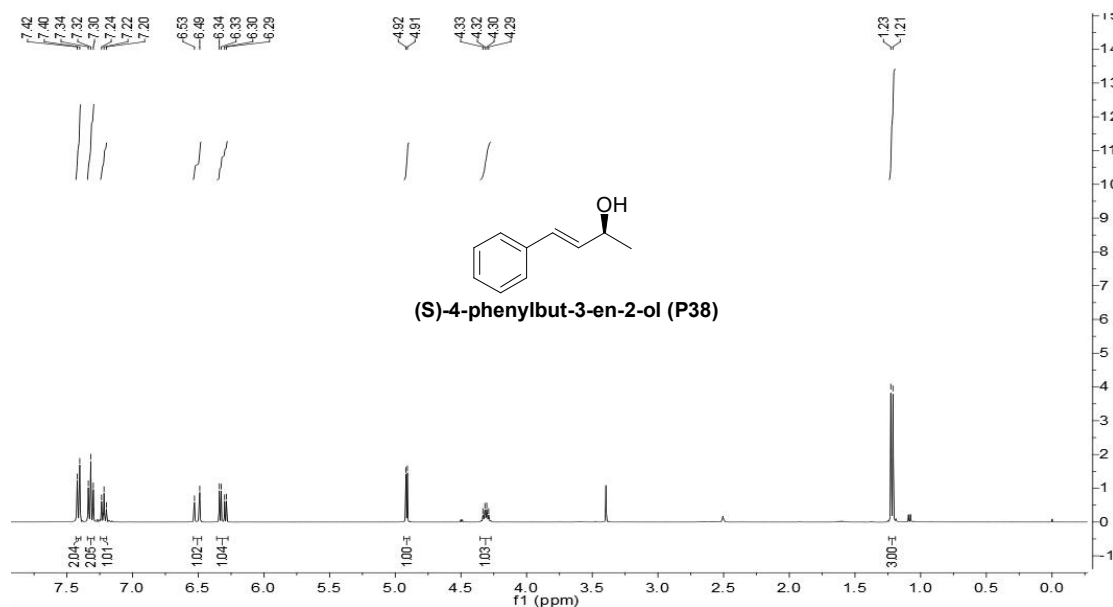

$^1\text{H}$  NMR (DMSO- $d_6$ , 600 MHz) of (S)-4-phenylbut-3-en-2-ol (P38)

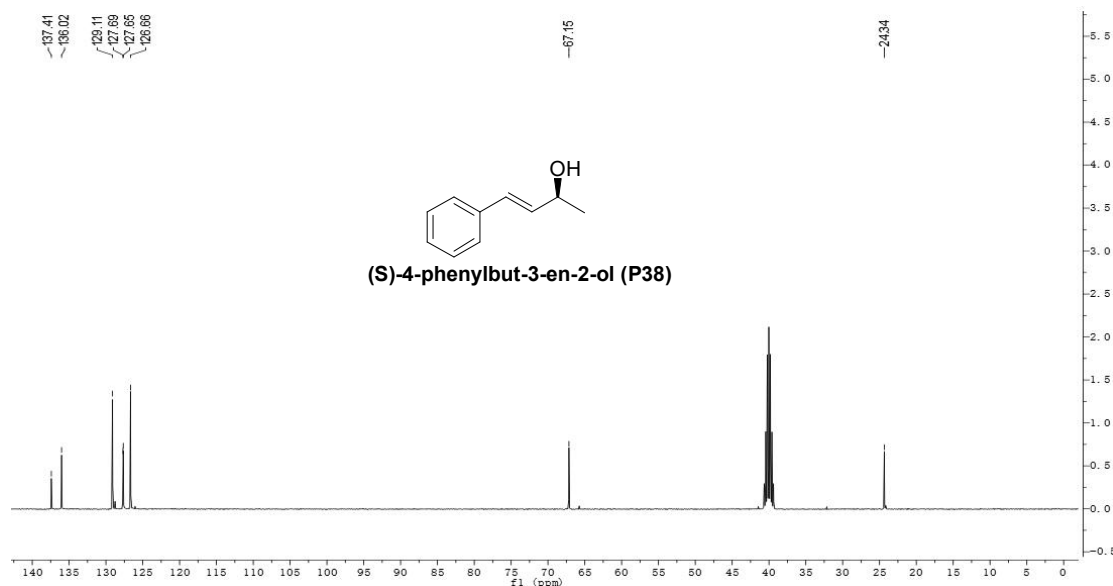

$^{13}\text{C}\{^1\text{H}\}$  NMR (DMSO- $d_6$ , 150 MHz) of (S)-4-phenylbut-3-en-2-ol (P38)

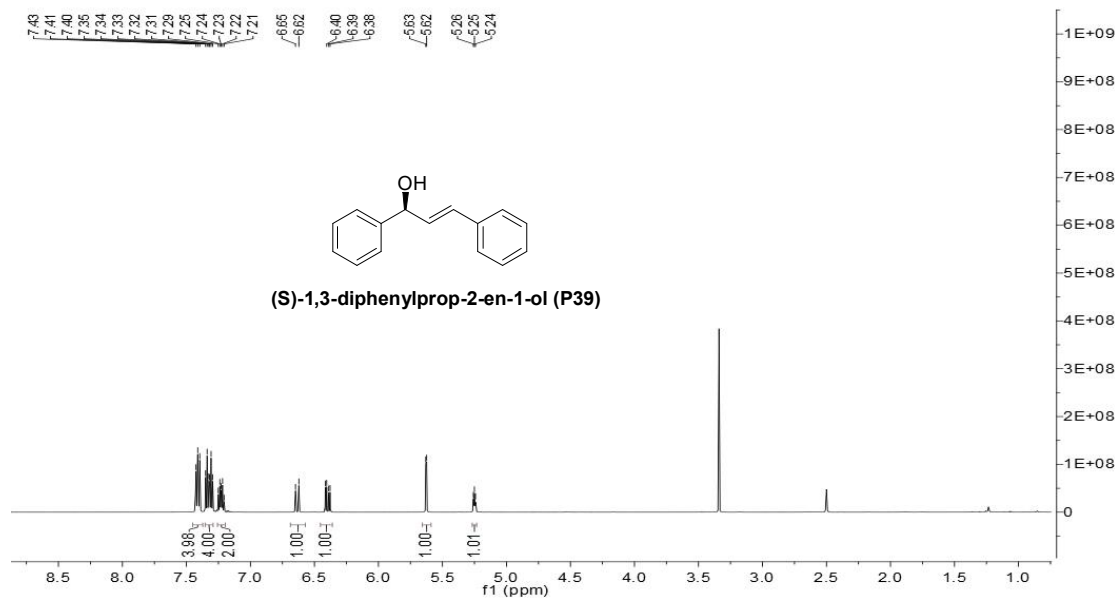

<sup>1</sup>H NMR (DMSO-*d*<sub>6</sub>, 600 MHz) of (S)-1,3-diphenylprop-2-en-1-ol (P39)

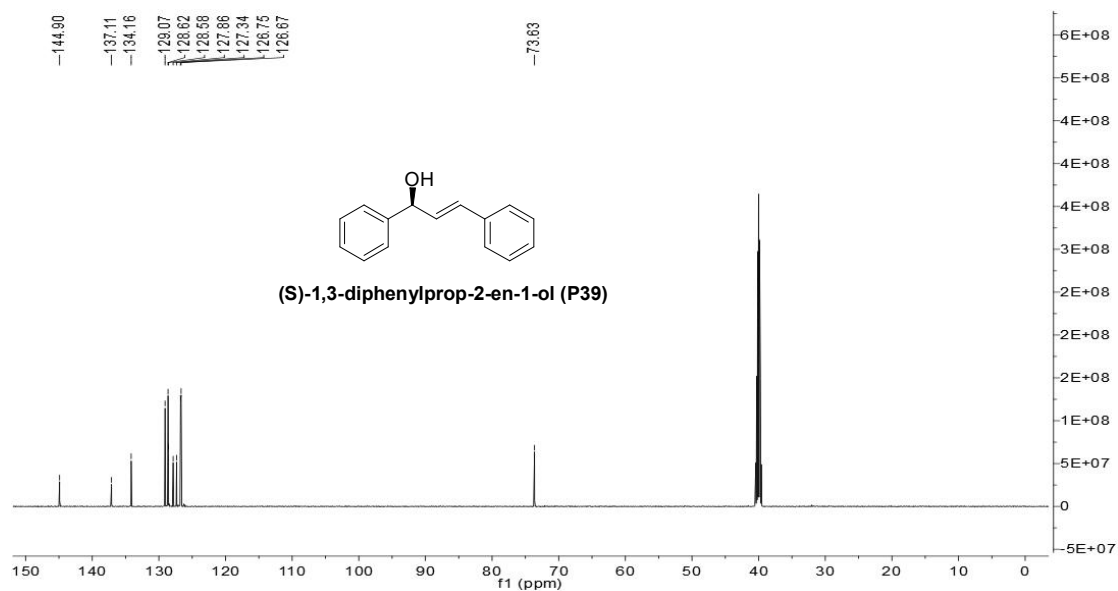

<sup>13</sup>C NMR (DMSO-*d*<sub>6</sub>, 150 MHz) of (S)-1,3-diphenylprop-2-en-1-ol (P39)

## 7. HPLC and GC chromatograms of alcohol products

**(±)-1-Phenylethanol** : The racemate was determined by GC equipped with a chiral  $\beta$ -DEX™120 (df = 0.25 $\mu$ m, 0.25 mm i.d.×30 m, fused silica capillary column); carrier gas: H<sub>2</sub>; injector temperature: 250 °C; detector temperature: 250 °C; column temperature: 115 °C; inlet pressure = 0.08 MPa.

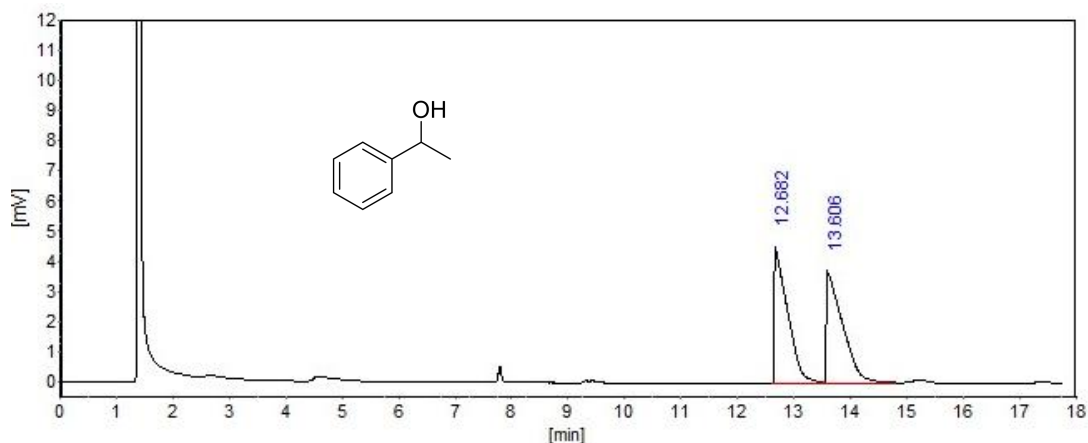

**(S)-1-Phenylethanol (P1)**: 98.8% ee (*S*). The enantiomeric excess was determined by GC equipped with a chiral  $\beta$ -DEX™120 (df = 0.25 $\mu$ m, 0.25 mm i.d.×30 m, fused silica capillary column); carrier gas: H<sub>2</sub>; detector temperature: 250 °C; injector temperature: 250 °C; column temperature: 115 °C; inlet pressure = 0.08 MPa.

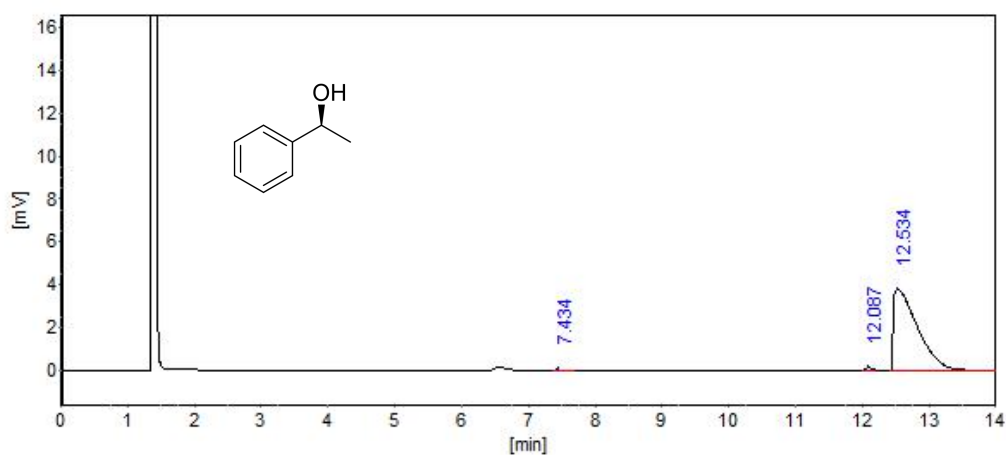

| Peak | Retention time [min] | Area [uv*s] | Area [%] |
|------|----------------------|-------------|----------|
| 2    | 12.087               | 564         | 0.581    |
| 3    | 12.534               | 96467       | 99.419   |



**(±)-1-(2-Fluoro-phenyl)-ethanol:** The racemate was determined by GC equipped with a chiral β-DEX™120 (df = 0.25µm, 0.25 mm i.d.×30 m, fused silica capillary column); carrier gas: H<sub>2</sub>; detector temperature: 250 °C; injector temperature: 250 °C; column temperature: 115 °C; inlet pressure = 0.08 MPa.

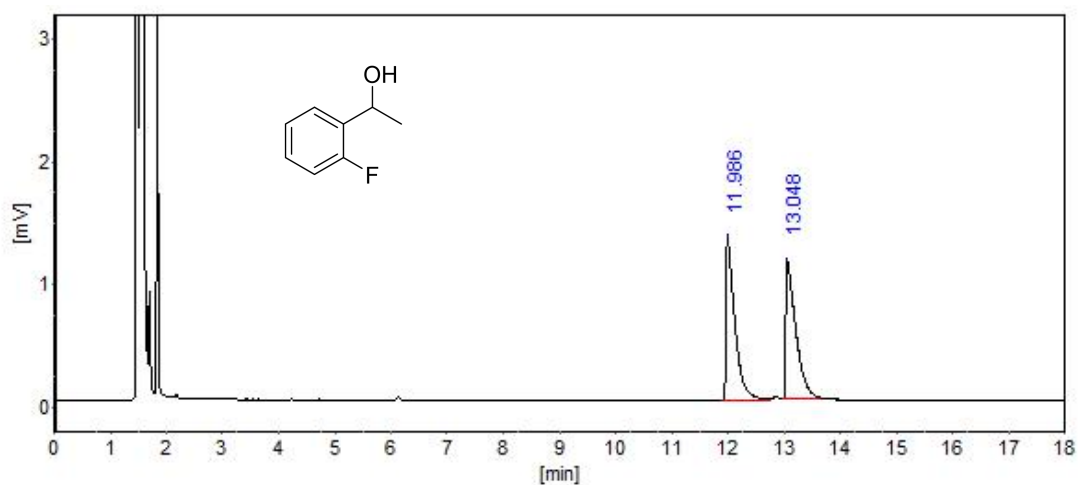

**(S)-1-(2-Fluoro-phenyl)-ethanol (P2):** 99.2% ee (*S*). The enantiomeric excess was determined by GC equipped with a chiral β-DEX™120 (df = 0.25µm, 0.25 mm i.d.×30 m, fused silica capillary column); carrier gas: H<sub>2</sub>; detector temperature: 250 °C; injector temperature: 250 °C; column temperature: 115 °C; inlet pressure = 0.08 MPa.

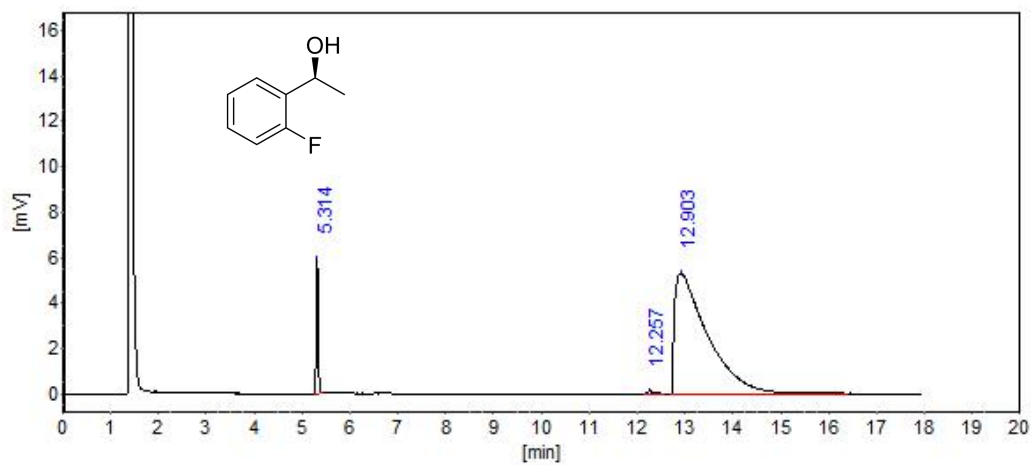

| Peak | Retention time<br>[min] | Area<br>[uv*s] | Area<br>[%] |
|------|-------------------------|----------------|-------------|
| 2    | 12.257                  | 1002           | 0.395       |
| 3    | 12.903                  | 252296         | 99.605      |

**(±)-1-(2-Chlorophenyl)-ethan-1-ol:** The racemate was determined by GC equipped with a chiral β-DEX™120 (df = 0.25µm, 0.25 mm i.d.×30 m, fused silica capillary column); carrier gas: H<sub>2</sub>; detector temperature: 250 °C; injector temperature: 250 °C; column temperature: 125 °C; inlet pressure = 0.06 MPa.

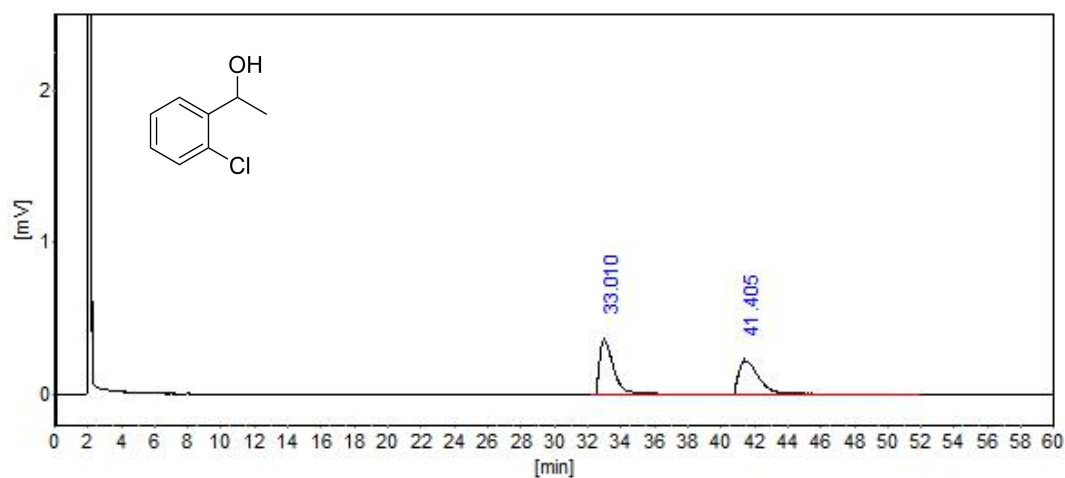

**(S)-1-(2-Chlorophenyl)-ethan-1-ol (P3):** 99.7% ee (S). The enantiomeric excess was determined by GC equipped with a chiral β-DEX™120 (df = 0.25µm, 0.25 mm i.d.×30 m, fused silica capillary column); carrier gas: H<sub>2</sub>; detector temperature: 250 °C; injector temperature: 250 °C; column temperature: 125 °C; inlet pressure = 0.06 MPa.

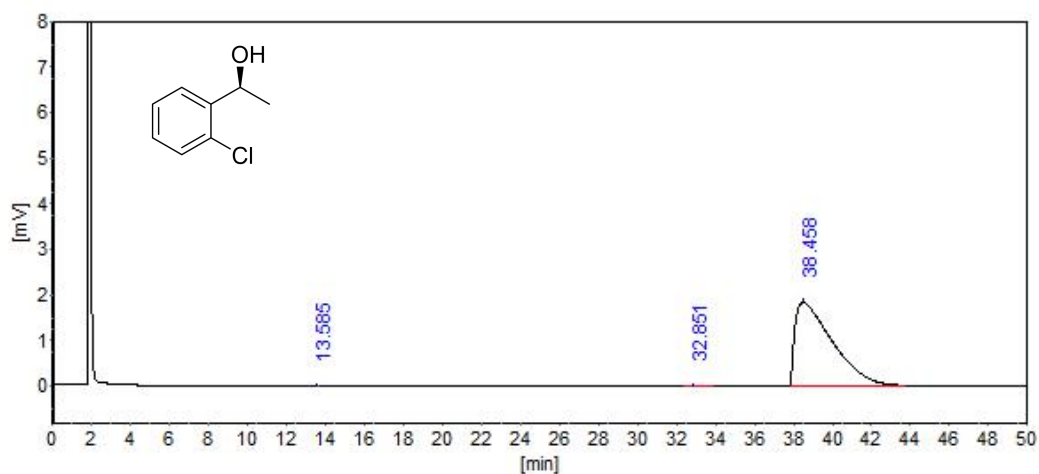

| Peak | Retention time<br>[min] | Area<br>[uv*s] | Area<br>[%] |
|------|-------------------------|----------------|-------------|
| 2    | 32.851                  | 360            | 0.145       |
| 3    | 38.458                  | 247284         | 99.855      |

**(±)-1-(2-Bromophenyl)-ethan-1-ol:** The racemate was determined by GC equipped with a chiral β-DEX™120 (df = 0.25µm, 0.25 mm i.d.×30 m, fused silica capillary column); carrier gas: H<sub>2</sub>; detector temperature: 250 °C; injector temperature: 250 °C; column temperature: 130 °C; inlet pressure = 0.06 MPa.

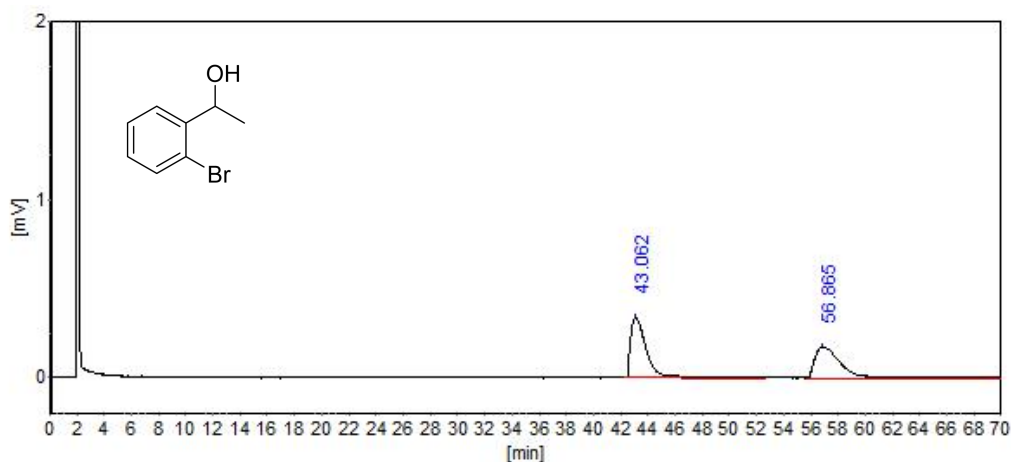

**(S)-1-(2-Bromophenyl)-ethan-1-ol (P4):** 99.6% ee (S). The enantiomeric excess was determined by GC equipped with a chiral β-DEX™120 (df = 0.25µm, 0.25 mm i.d.×30 m, fused silica capillary column); carrier gas: H<sub>2</sub>; detector temperature: 250 °C; injector temperature: 250 °C; column temperature: 130 °C; inlet pressure = 0.06 MPa.

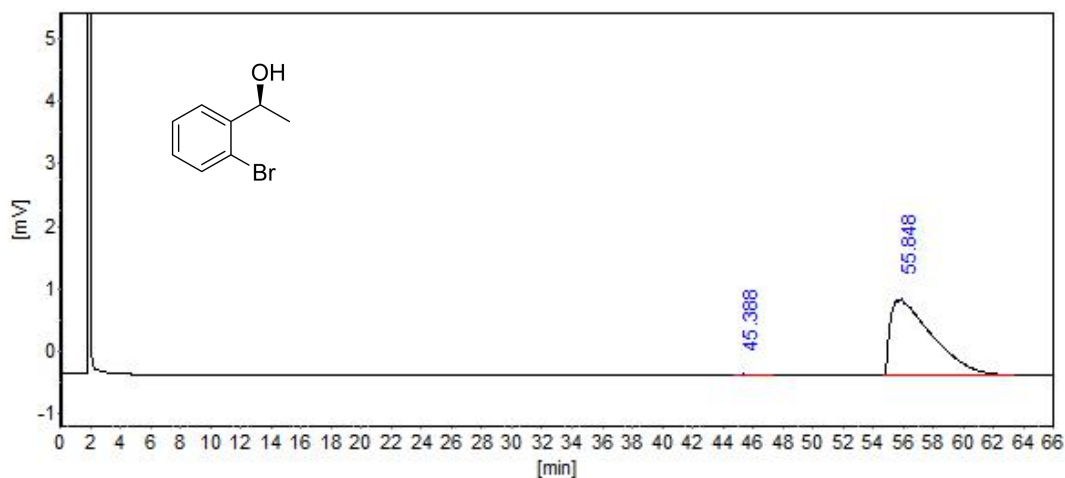

| Peak | Retention time [min] | Area [uv*s] | Area [%] |
|------|----------------------|-------------|----------|
| 1    | 45.388               | 476         | 0.202    |
| 2    | 55.848               | 235676      | 99.798   |

**(±)-1-(2-Trifluoromethyl-phenyl)-ethanol:** The racemate was determined by GC equipped with a chiral β-DEX™120 (df = 0.25µm, 0.25 mm i.d.×30 m, fused silica capillary column); carrier gas: H<sub>2</sub>; detector temperature: 250 °C; injector temperature: 250 °C; column temperature: 115 °C; inlet pressure = 0.06 MPa.

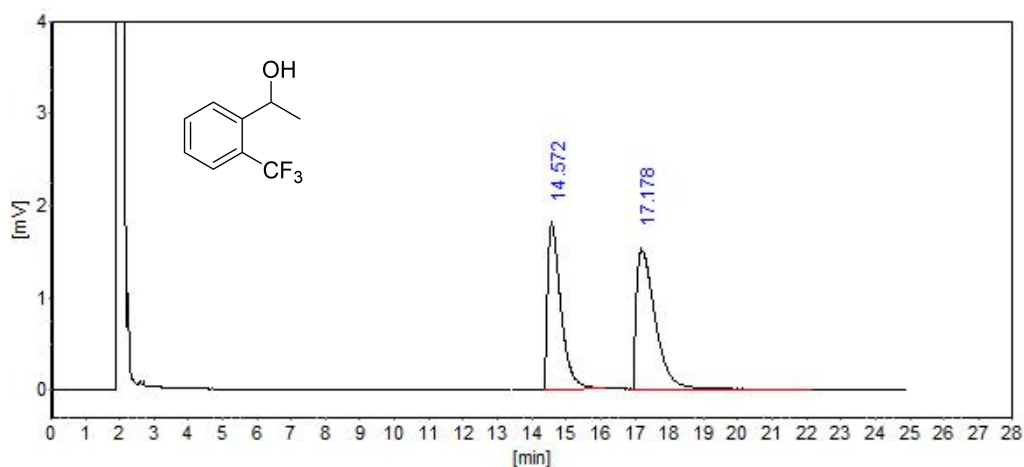

**(S)-1-(2-Trifluoromethyl-phenyl)-ethanol (P5):** 99.7% ee (S). The enantiomeric excess was determined by GC equipped with a chiral β-DEX™120 (df = 0.25µm, 0.25 mm i.d.×30 m, fused silica capillary column); carrier gas: H<sub>2</sub>; detector temperature: 250 °C; injector temperature: 250 °C; column temperature: 115 °C; inlet pressure = 0.06 MPa.

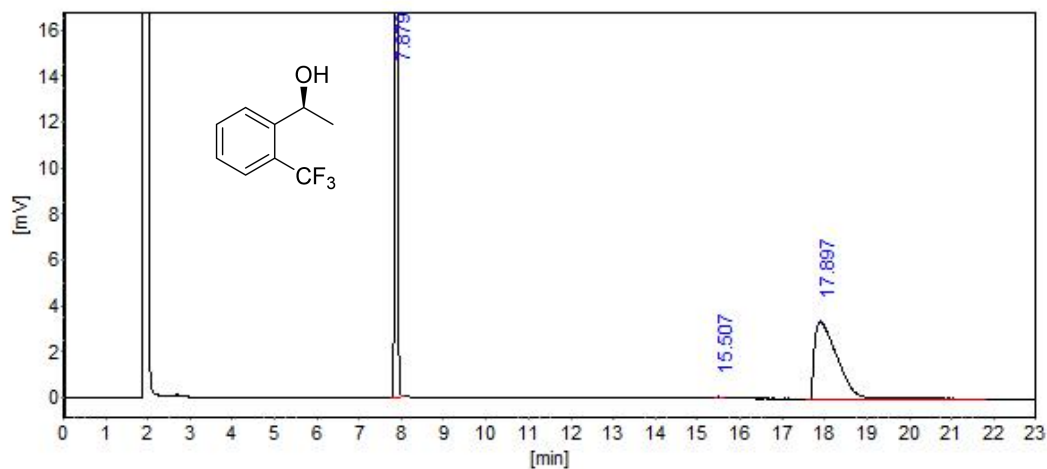

| Peak | Retention time [min] | Area [uv*s] | Area [%] |
|------|----------------------|-------------|----------|
| 2    | 15.507               | 184         | 0.148    |
| 3    | 17.897               | 124193      | 99.852   |

**(±)-1-o-Tolyl-ethanol:** The racemate was determined by GC equipped with a chiral β-DEX™120 (df = 0.25µm, 0.25 mm i.d.×30 m, fused silica capillary column); carrier gas: H<sub>2</sub>; detector temperature: 250 °C; injector temperature: 250 °C; column temperature: 125 °C; inlet pressure = 0.06 MPa.

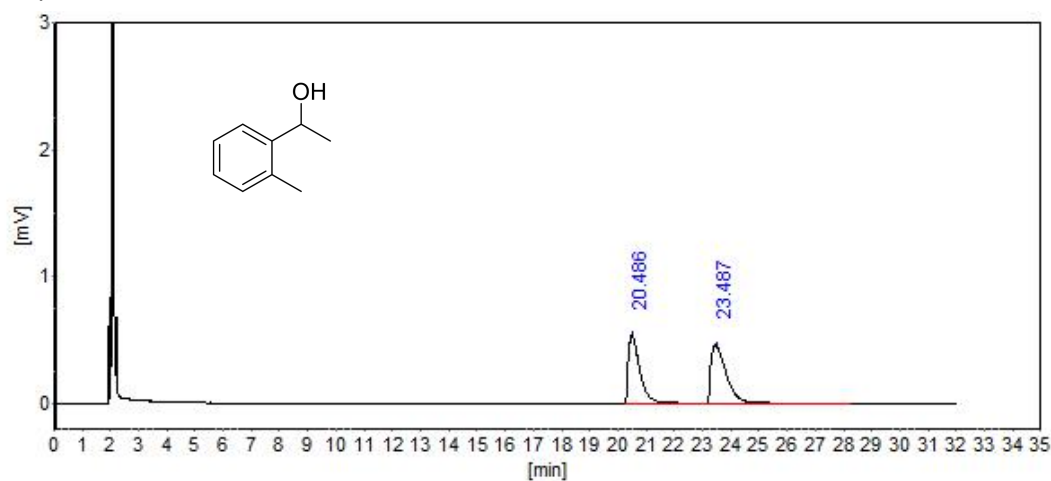

**(S)-1-o-Tolyl-ethanol (P6):** 99.9% ee (*S*). The enantiomeric excess was determined by GC equipped with a chiral β-DEX™120 (df = 0.25µm, 0.25 mm i.d.×30 m, fused silica capillary column); carrier gas: H<sub>2</sub>; detector temperature: 250 °C; injector temperature: 250 °C; column temperature: 125 °C; inlet pressure = 0.06 MPa.

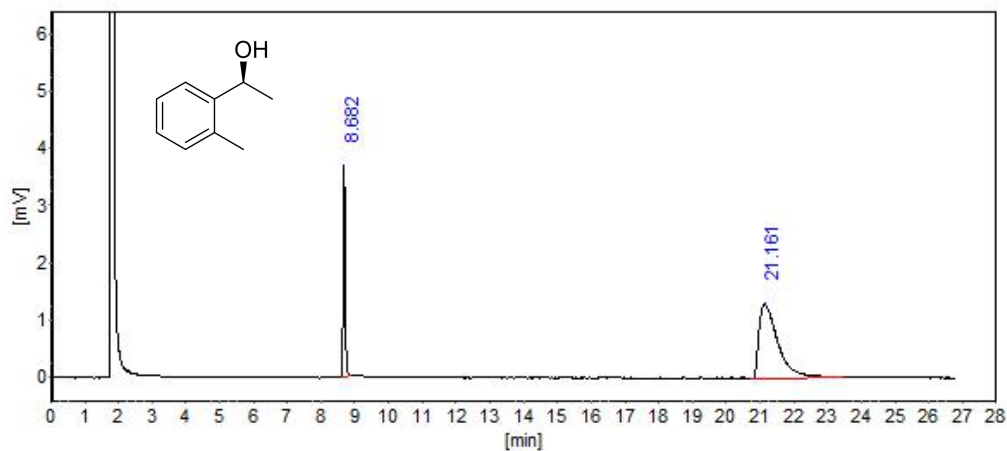

| Peak | Retention time [min] | Area [uv*s] | Area [%] |
|------|----------------------|-------------|----------|
| 2    | 21.129               | 50069       | 100      |

**(±)-1-(2-Methoxy-phenyl)-ethanol:** The racemate was determined by GC equipped with a chiral β-DEX™120 (df = 0.25µm, 0.25 mm i.d.×30 m, fused silica capillary column); carrier gas: H<sub>2</sub>; detector temperature: 250 °C; injector temperature: 250 °C; column temperature: 125 °C; inlet pressure = 0.06 MPa.

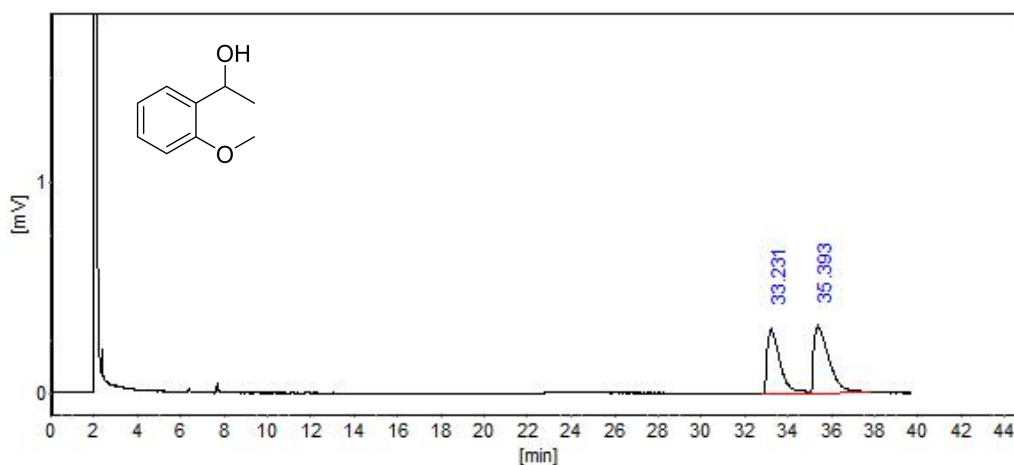

**(S)-1-(2-Methoxy-phenyl)-ethanol (P7):** 99.9% ee (S). The enantiomeric excess was determined by GC equipped with a chiral β-DEX™120 (df = 0.25µm, 0.25 mm i.d.×30 m, fused silica capillary column); carrier gas: H<sub>2</sub>; detector temperature: 250 °C; injector temperature: 250 °C; column temperature: 125 °C; inlet pressure = 0.06 MPa.

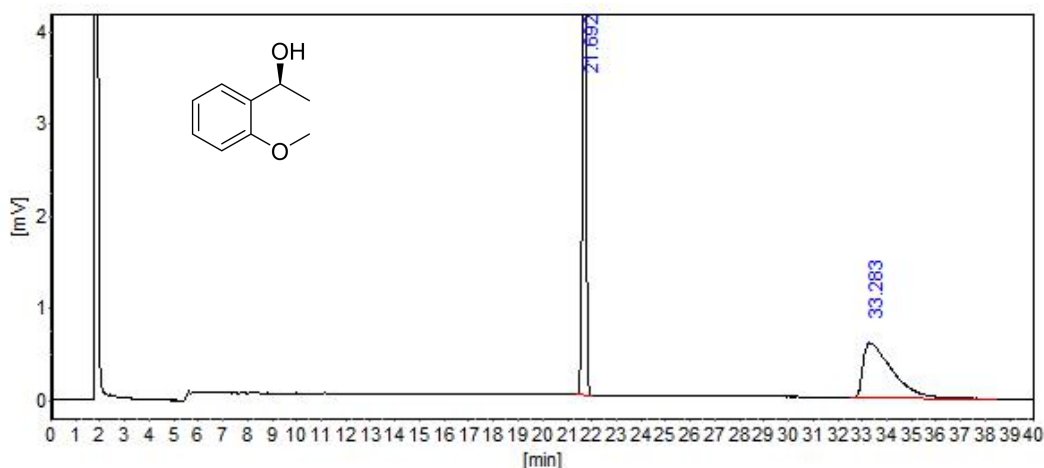

| Peak | Retention time [min] | Area [uv*s] | Area [%] |
|------|----------------------|-------------|----------|
| 2    | 33.283               | 48772       | 100      |

**(±)-1-(4-Fluoro-phenyl)-ethanol:** The racemate was determined by GC equipped with a chiral  $\beta$ -DEX<sup>TM</sup>120 (df = 0.25 $\mu$ m, 0.25 mm i.d.×30 m, fused silica capillary column); carrier gas: H<sub>2</sub>; detector temperature: 250 °C; injector temperature: 250 °C; column temperature: 115 °C; inlet pressure = 0.06 MPa.

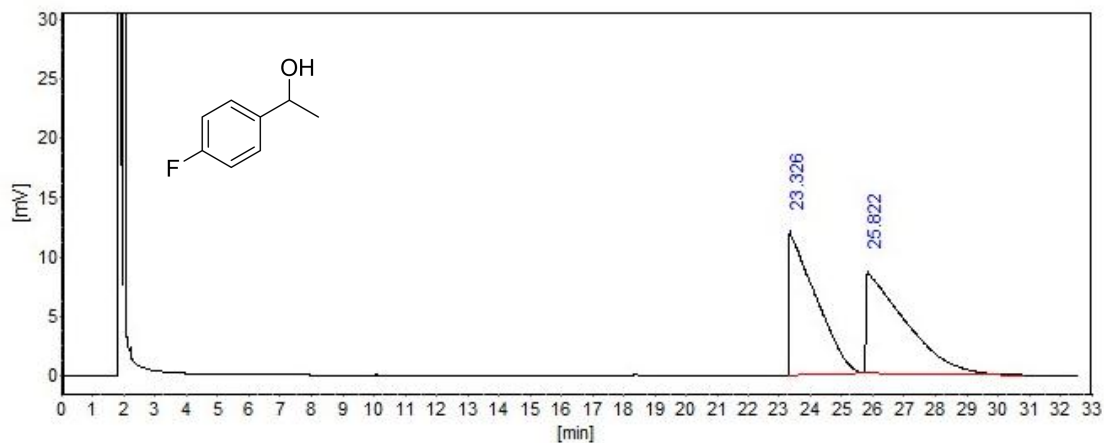

**(S)-1-(4-Fluoro-phenyl)-ethanol (P8):** 99.4% ee (S). The enantiomeric excess was determined by GC equipped with a chiral  $\beta$ -DEX<sup>TM</sup>120 (df = 0.25 $\mu$ m, 0.25 mm i.d.×30 m, fused silica capillary column); carrier gas: H<sub>2</sub>; detector temperature: 250 °C; injector temperature: 250 °C; column temperature: 115 °C; inlet pressure = 0.06 MPa.

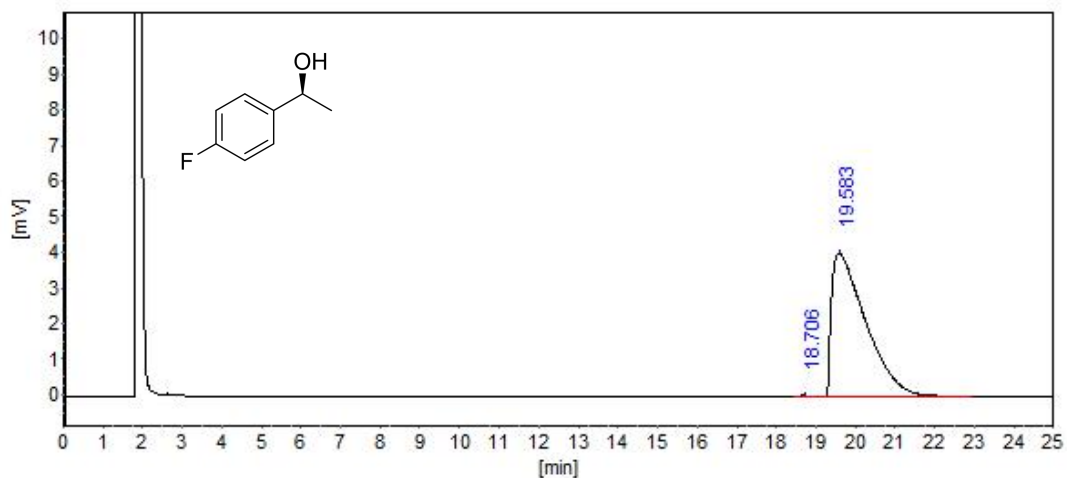

| Peak | Retention time [min] | Area [uv*s] | Area [%] |
|------|----------------------|-------------|----------|
| 1    | 18.706               | 787         | 0.324    |
| 2    | 19.583               | 242363      | 99.676   |

**(±)-1-p-Tolyl-ethanol:** The racemate was determined by GC equipped with a chiral β-DEX™120 (df = 0.25μm, 0.25 mm i.d.×30 m, fused silica capillary column); carrier gas: H<sub>2</sub>; detector temperature: 250 °C; injector temperature: 250 °C; column temperature: 115 °C; inlet pressure = 0.08 MPa.

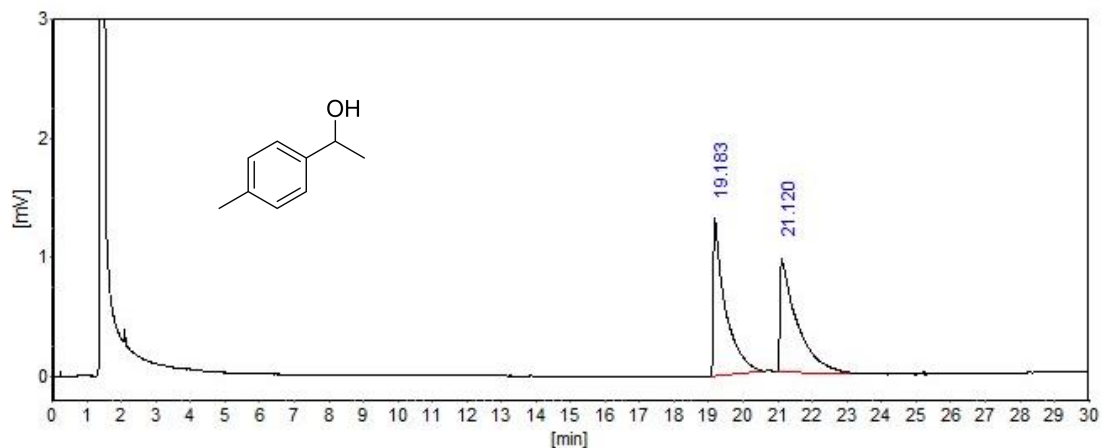

**(S)-1-p-Tolyl-ethanol (P9):** 98.6% ee (S). The enantiomeric excess was determined by GC equipped with a chiral β-DEX™120 (df = 0.25μm, 0.25 mm i.d.×30 m, fused silica capillary column); carrier gas: H<sub>2</sub>; detector temperature: 250 °C; injector temperature: 250 °C; column temperature: 115 °C; inlet pressure = 0.08 MPa.

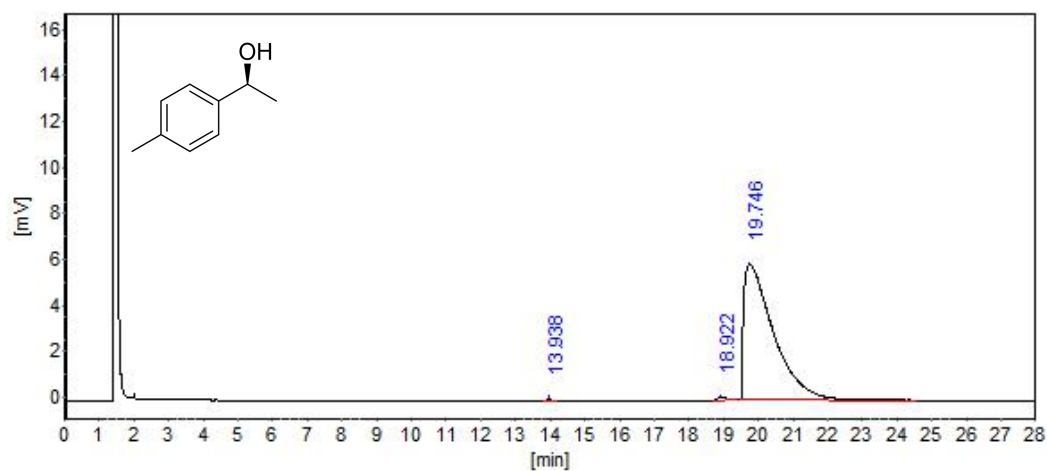

| Peak | Retention time<br>[min] | Area<br>[uv*s] | Area<br>[%] |
|------|-------------------------|----------------|-------------|
| 2    | 18.922                  | 2375           | 0.673       |
| 3    | 19.746                  | 350560         | 99.327      |



**(±)-1-(4-ethylphenyl)ethan-1-ol:** The racemate was determined by GC equipped with a chiral β-DEX™120 (df = 0.25µm, 0.25 mm i.d.×30 m, fused silica capillary column); carrier gas: H<sub>2</sub>; detector temperature: 250 °C; injector temperature: 250 °C; column temperature: 125 °C; inlet pressure = 0.06 MPa.

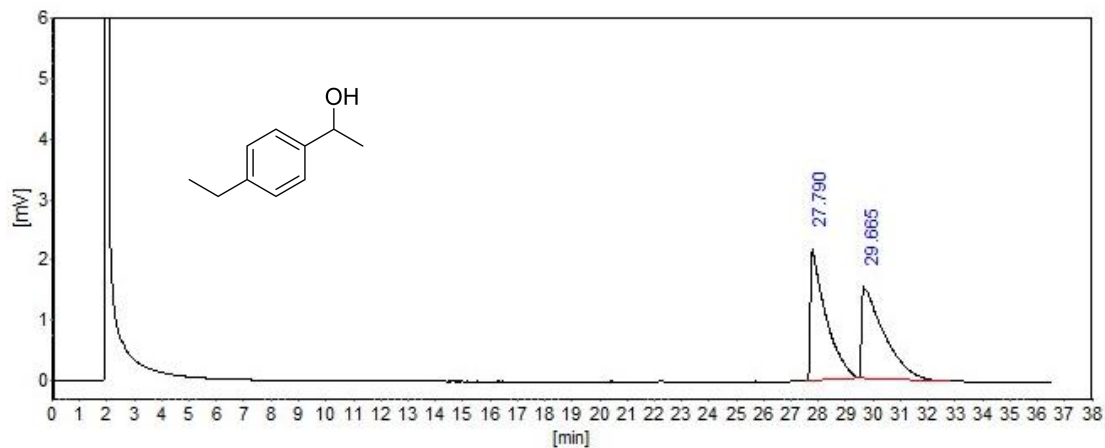

**(S)-1-(4-ethylphenyl)ethan-1-ol (P10):** 99.6% ee (S). The enantiomeric excess was determined by GC equipped with a chiral β-DEX™120 (df = 0.25µm, 0.25 mm i.d.×30 m, fused silica capillary column); carrier gas: H<sub>2</sub>; detector temperature: 250 °C; injector temperature: 250 °C; column temperature: 125 °C; inlet pressure = 0.06 MPa.

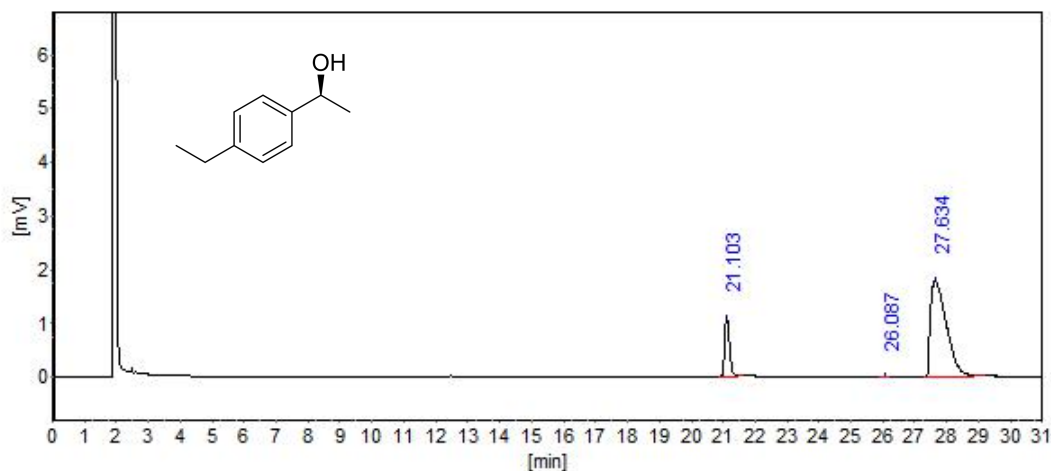

| Peak | Retention time [min] | Area [uv*s] | Area [%] |
|------|----------------------|-------------|----------|
| 2    | 26.087               | 132         | 0.211    |
| 3    | 27.634               | 62339       | 99.789   |

**(±)-1-(4-Methoxy-phenyl)-ethanol:** The racemate was determined by GC equipped with a chiral  $\beta$ -DEX<sup>TM</sup>120 (df = 0.25 $\mu$ m, 0.25 mm i.d.×30 m, fused silica capillary column); carrier gas: H<sub>2</sub>; detector temperature: 250 °C; injector temperature: 250 °C; column temperature: 125 °C; inlet pressure = 0.06 MPa.

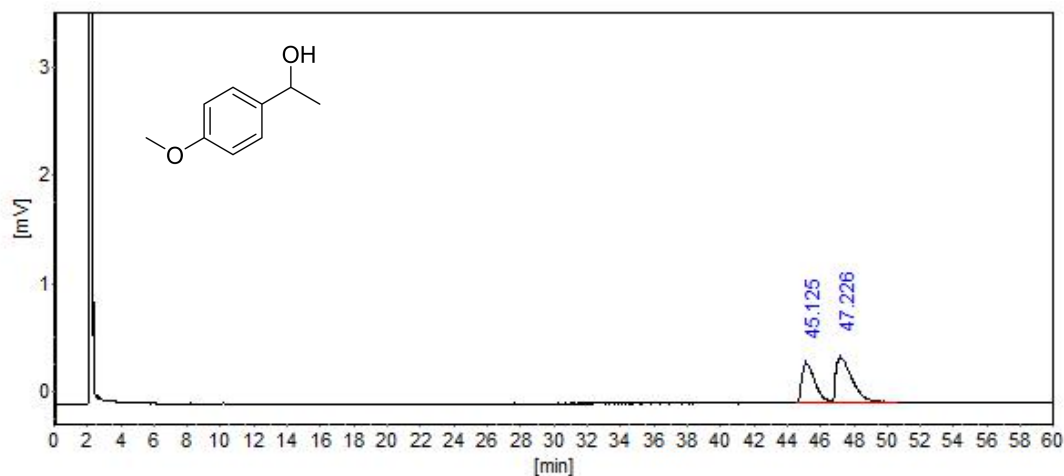

**(S)-1-(4-Methoxy-phenyl)-ethanol (P11):** 99.6% ee (S). The enantiomeric excess was determined by GC equipped with a chiral  $\beta$ -DEX<sup>TM</sup>120 (df = 0.25 $\mu$ m, 0.25 mm i.d.×30 m, fused silica capillary column); carrier gas: H<sub>2</sub>; detector temperature: 250 °C; injector temperature: 250 °C; column temperature: 125 °C; inlet pressure = 0.06 MPa.

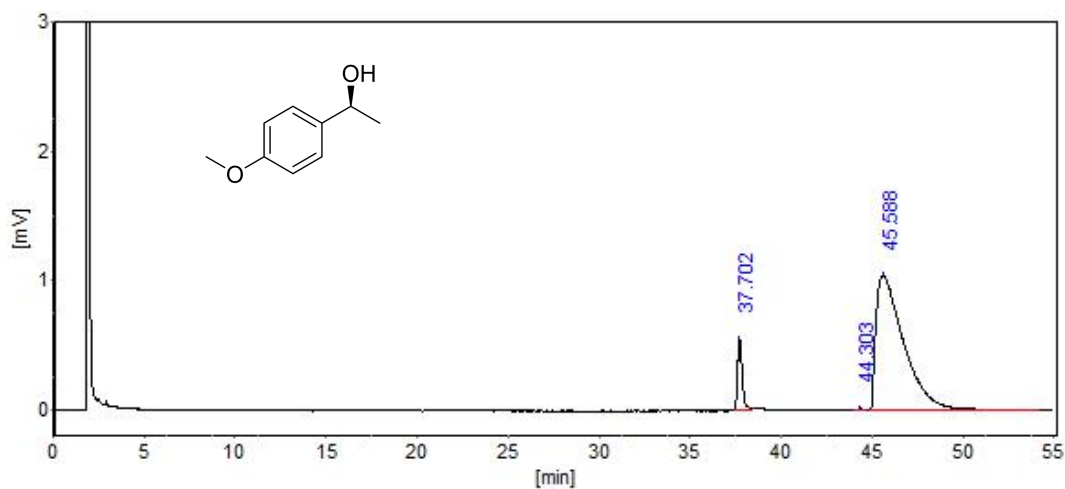

| Peak | Retention time [min] | Area [uv*s] | Area [%] |
|------|----------------------|-------------|----------|
| 2    | 44.303               | 274         | 0.246    |
| 3    | 45.588               | 110993      | 99.754   |

**(±)-1-(4-nitrophenyl)ethan-1-ol:** The racemate was determined by GC equipped with a chiral β-DEX™120 (df = 0.25µm, 0.25 mm i.d.×30 m, fused silica capillary column); carrier gas: H<sub>2</sub>; detector temperature: 250 °C; injector temperature: 250 °C; column temperature: 160 °C; inlet pressure = 0.08 MPa.

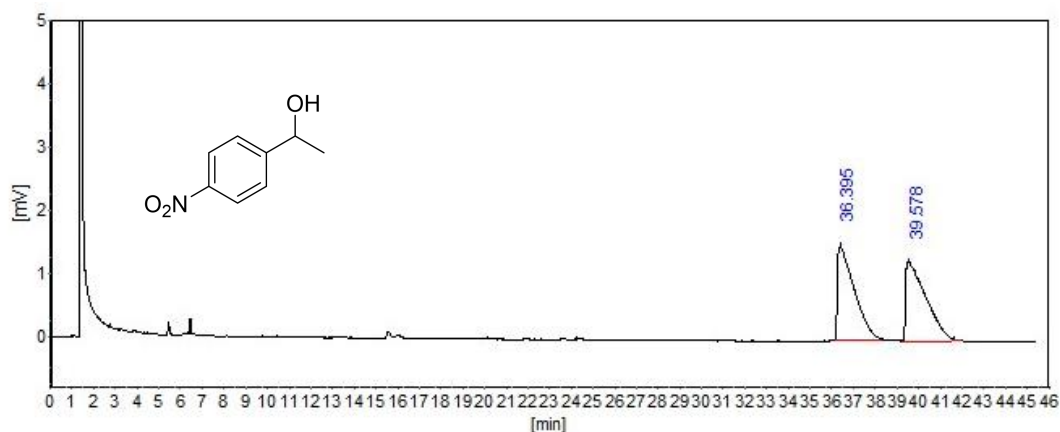

**(S)-1-(4-nitrophenyl)ethan-1-ol:** 88.5 % ee (S). The conversion and enantiomeric excess were determined by GC equipped with a chiral β-DEX™120 (df = 0.25µm, 0.25 mm i.d.×30 m, fused silica capillary column); carrier gas: H<sub>2</sub>; detector temperature: 250 °C; injector temperature: 250 °C; column temperature: 160 °C; inlet pressure = 0.08 MPa.

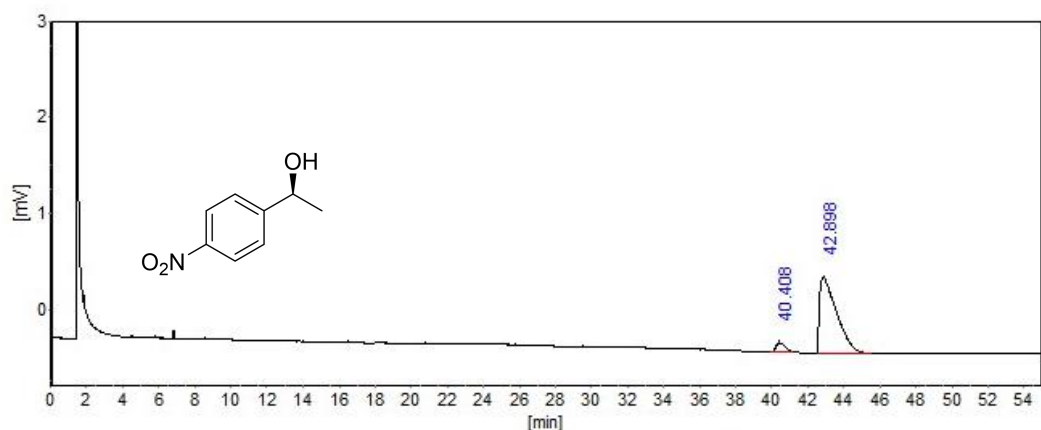

| Peak | Retention time [min] | Area[uv*s] | %Area  |
|------|----------------------|------------|--------|
| 1    | 40.408               | 3198       | 5.774  |
| 2    | 42.898               | 52186      | 94.226 |

**(±)-1-(3-bromophenyl)ethan-1-ol**: The racemate was determined by GC equipped with a chiral β-DEX™120 (df = 0.25µm, 0.25 mm i.d.×30 m, fused silica capillary column); carrier gas: H<sub>2</sub>; detector temperature: 250 °C; injector temperature: 250 °C; column temperature: 140 °C; inlet pressure = 0.08 MPa.

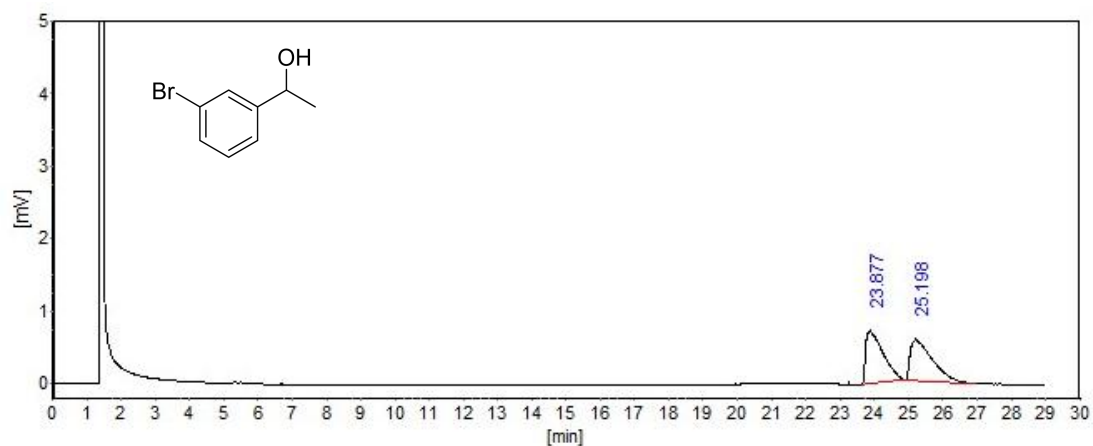

**(S)-1-(3-bromophenyl)ethan-1-ol (P12)**: 97.2 % ee (*S*). The enantiomeric excess was determined by GC equipped with a chiral β-DEX™120 (df = 0.25µm, 0.25 mm i.d.×30 m, fused silica capillary column); carrier gas: H<sub>2</sub>; detector temperature: 250 °C; injector temperature: 250 °C; column temperature: 140 °C; inlet pressure = 0.08 MPa.

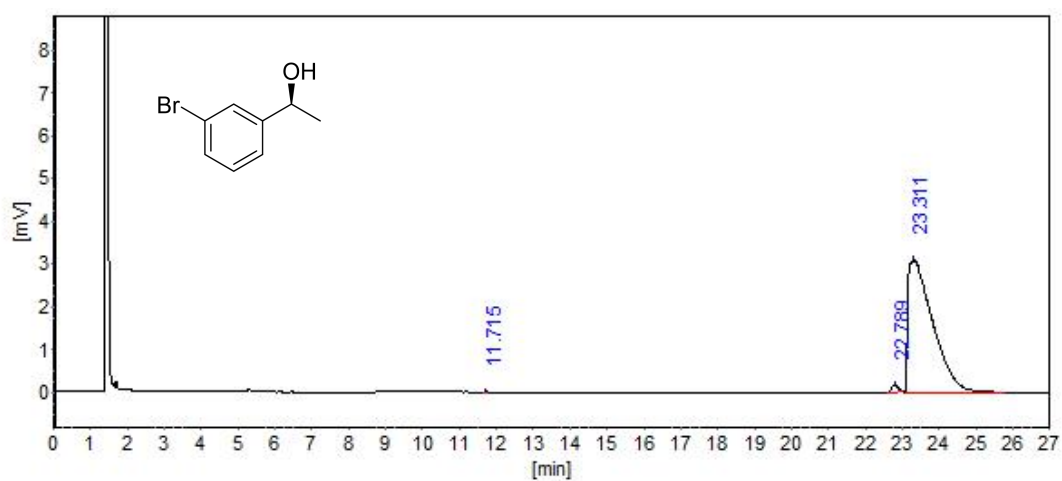

| Peak | Retention time [min] | Area [uv*s] | Area [%] |
|------|----------------------|-------------|----------|
| 2    | 22.789               | 2035        | 1.395    |
| 3    | 23.311               | 143807      | 98.605   |

**(±)-1-(3-chlorophenyl)ethan-1-ol:** The racemate was determined by GC equipped with a chiral β-DEX™120 (df = 0.25µm, 0.25 mm i.d.×30 m, fused silica capillary column); carrier gas: H<sub>2</sub>; detector temperature: 250 °C; injector temperature: 250 °C; column temperature: 130°C; inlet pressure = 0.08 MPa.

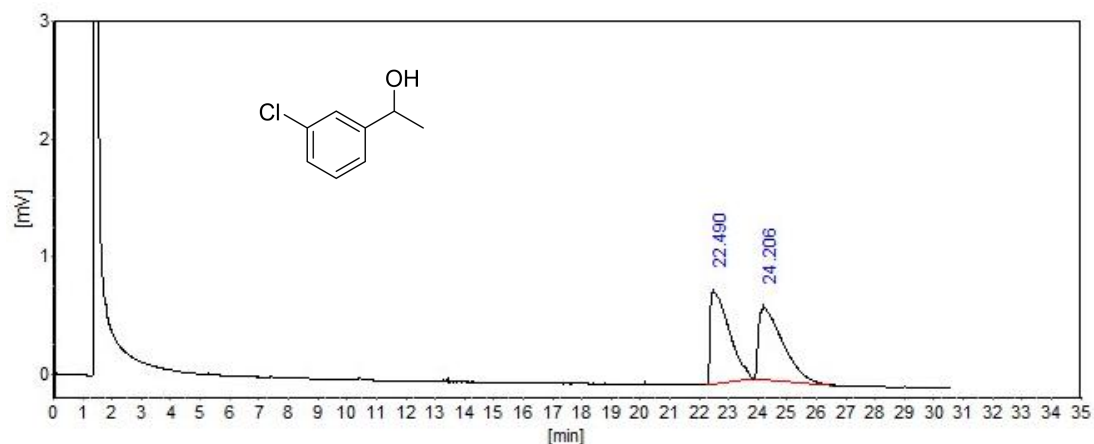

**(S)-1-(3-chlorophenyl)ethan-1-ol (P13):** 97.3 % ee (S). The enantiomeric excess was determined by GC equipped with a chiral β-DEX™120 (df = 0.25µm, 0.25 mm i.d.×30 m, fused silica capillary column); carrier gas: H<sub>2</sub>; detector temperature: 250 °C; injector temperature: 250 °C; column temperature: 130°C; inlet pressure = 0.08 MPa.

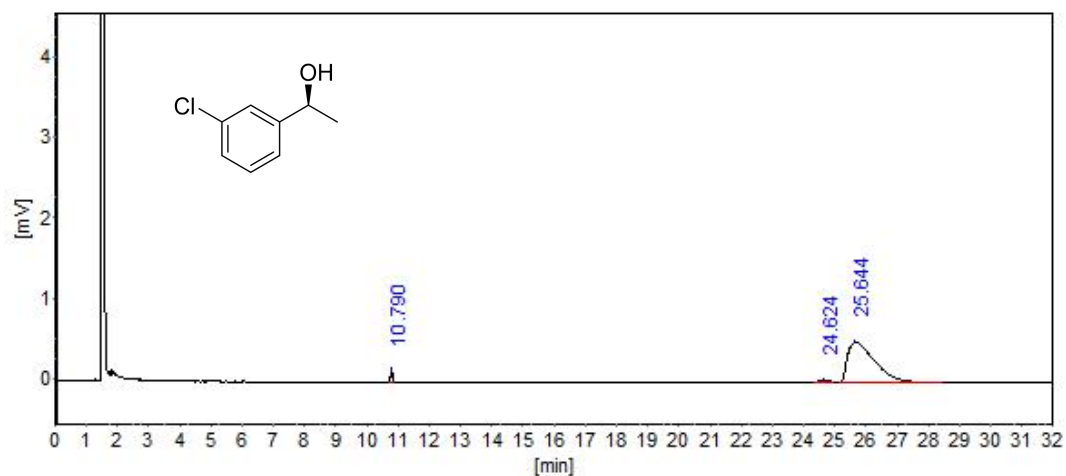

| Peak | Retention time<br>[min] | Area<br>[uv*s] | Area<br>[%] |
|------|-------------------------|----------------|-------------|
| 2    | 24.624                  | 407            | 1.331       |
| 3    | 25.644                  | 30193          | 98.669      |

**(±)-1-(3-(trifluoromethyl)phenyl)ethan-1-ol:** The racemate was determined by GC equipped with a chiral β-DEX™120 (df = 0.25μm, 0.25 mm i.d.×30 m, fused silica capillary column); carrier gas: H<sub>2</sub>; detector temperature: 250 °C; injector temperature: 250 °C; column temperature: 115 °C; inlet pressure = 0.06 MPa.

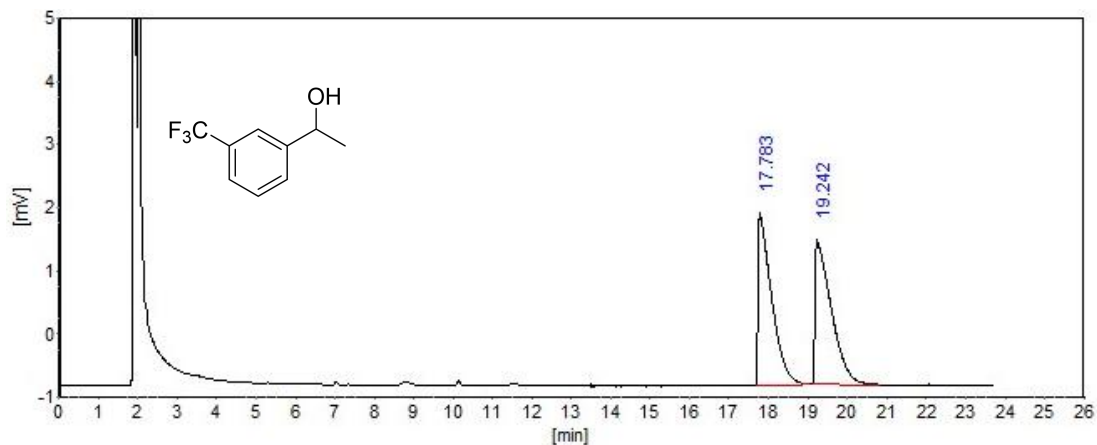

**(S)-1-(3-(trifluoromethyl)phenyl)ethan-1-ol (P14):** 98.4% ee (S). The enantiomeric excess was determined by GC equipped with a chiral β-DEX™120 (df = 0.25μm, 0.25 mm i.d.×30 m, fused silica capillary column); carrier gas: H<sub>2</sub>; detector temperature: 250 °C; injector temperature: 250 °C; column temperature: 115 °C; inlet pressure = 0.06 MPa.

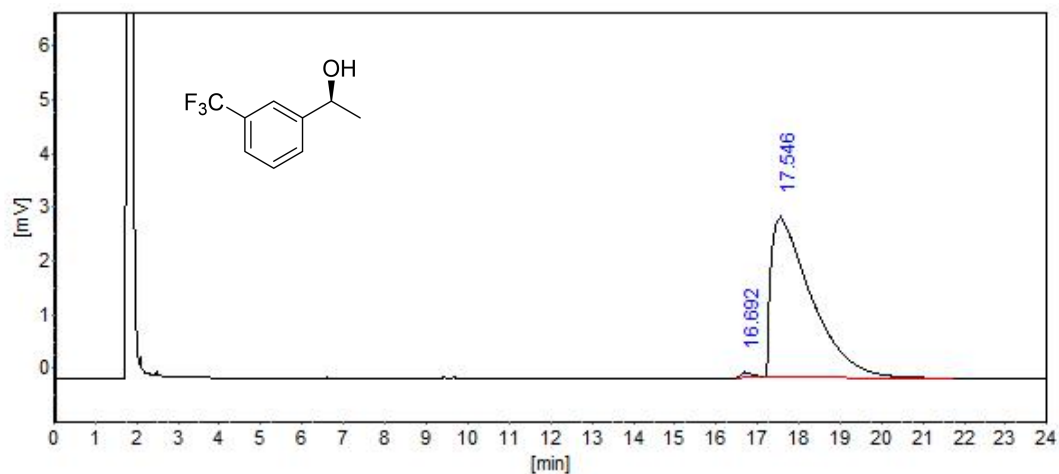

| Peak | Retention time [min] | Area [uv*s] | Area [%] |
|------|----------------------|-------------|----------|
| 1    | 16.692               | 1633        | 0.804    |
| 2    | 17.546               | 201466      | 99.196   |

**(±)-1-(3-methoxyphenyl)ethan-1-ol:** The racemate was determined by GC equipped with a chiral β-DEX™120 (df = 0.25µm, 0.25 mm i.d.×30 m, fused silica capillary column); carrier gas: H<sub>2</sub>; detector temperature: 250 °C; injector temperature: 250 °C; column temperature: 125 °C; inlet pressure = 0.06 MPa.

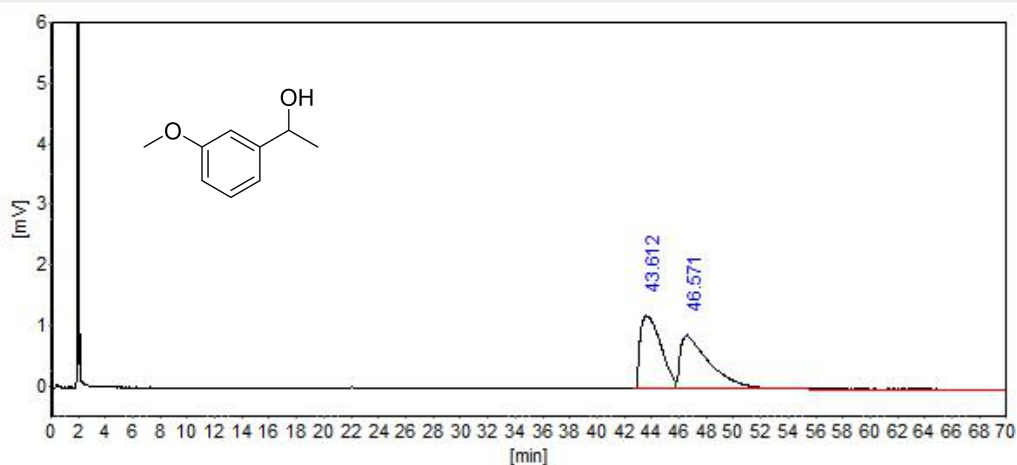

**(S)-1-(3-methoxyphenyl)ethan-1-ol (P15):** 99.6% ee (S). The enantiomeric excess was determined by GC equipped with a chiral β-DEX™120 (df = 0.25µm, 0.25 mm i.d.×30 m, fused silica capillary column); carrier gas: H<sub>2</sub>; detector temperature: 250 °C; injector temperature: 250 °C; column temperature: 125 °C; inlet pressure = 0.06 MPa.

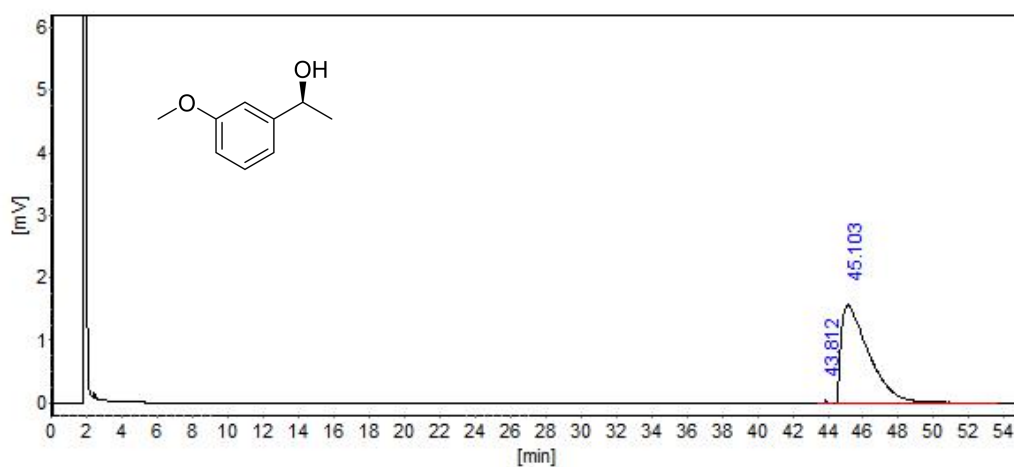

| Peak | Retention time [min] | Area [uv*s] | Area [%] |
|------|----------------------|-------------|----------|
| 1    | 43.812               | 277         | 0.162    |
| 2    | 45.103               | 170442      | 99.837   |

**(±)-1-Phenyl-butan-1-ol:** The racemate was determined by HPLC on Chiralcel OD-H column, hexane: isopropanol = 95:5; flow rate = 0.5 mL/min; UV detection at 254 nm.

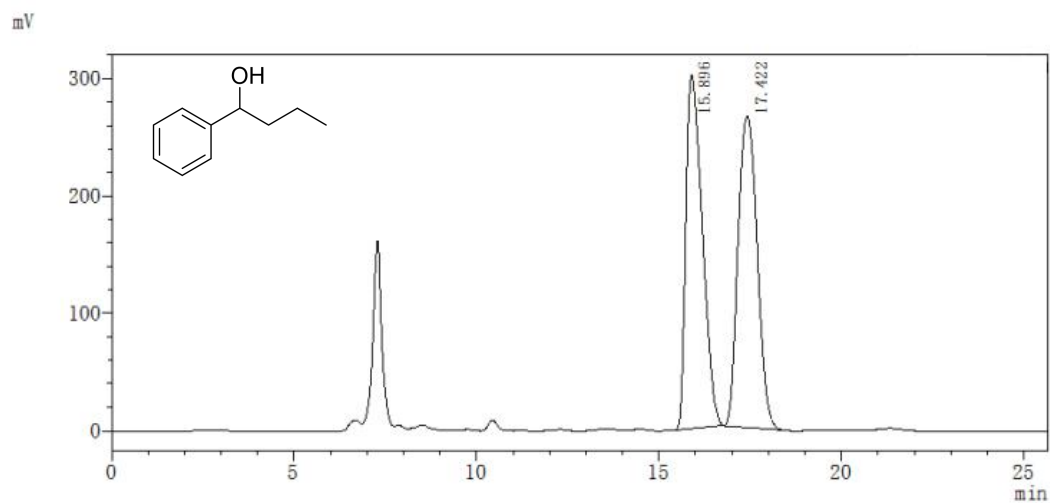

**(S)-1-Phenyl-butan-1-ol (P16):** 97.6% ee (S). The enantiomeric excess was determined by HPLC on Chiralcel OD-H column, hexane: isopropanol = 95:5; flow rate = 0.5 mL/min; UV detection at 254 nm.

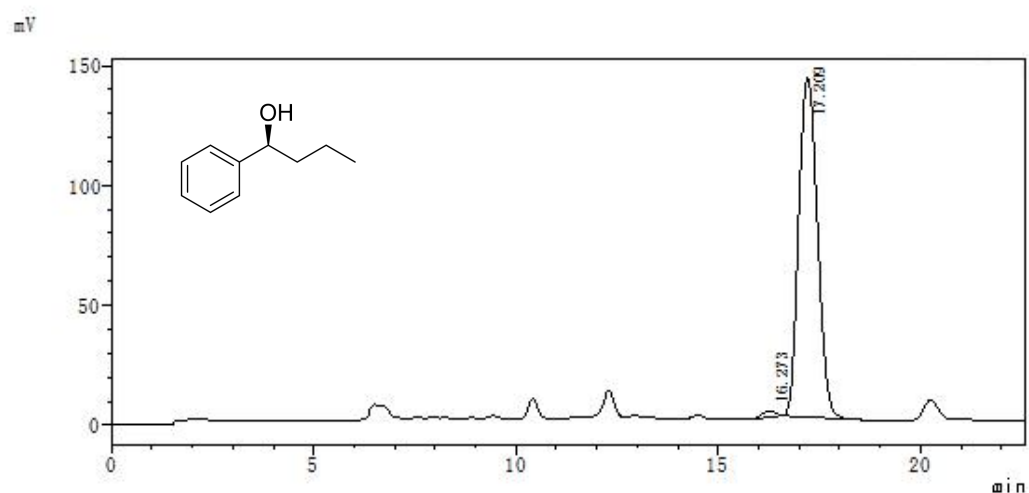

| Peak | Retention time [min] | Peak Area [mAU*s] | Peak Area [%] |
|------|----------------------|-------------------|---------------|
| 1    | 16.273               | 55793             | 1.210         |
| 2    | 17.209               | 4555539           | 98.790        |



**(±)-1-(3,4-dichlorophenyl)ethan-1-ol:** The racemate was determined by GC equipped with a chiral β-DEX™120 (df = 0.25µm, 0.25 mm i.d.×30 m, fused silica capillary column); carrier gas: H<sub>2</sub>; detector temperature: 250 °C; injector temperature: 250 °C; column temperature: 150 °C; inlet pressure = 0.08 MPa.

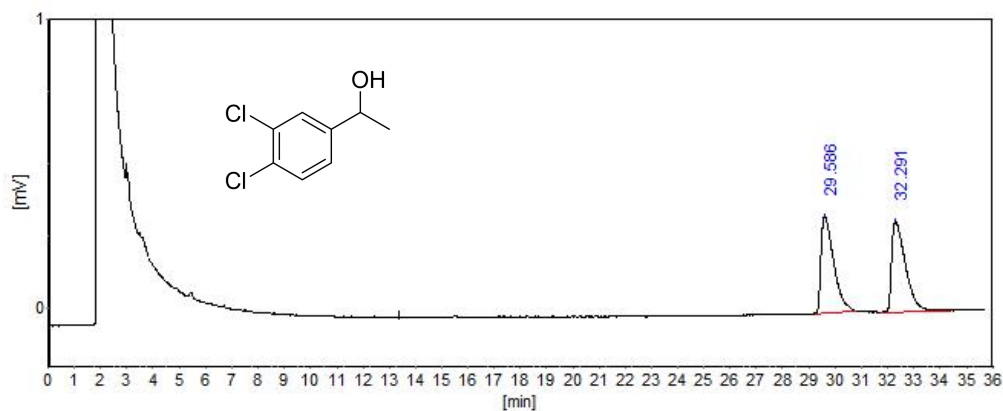

**(S)-1-(3,4-dichlorophenyl)ethan-1-ol:** 94.7 % ee (S). The racemate was determined by GC equipped with a chiral β-DEX™120 (df = 0.25µm, 0.25 mm i.d.×30 m, fused silica capillary column); carrier gas: H<sub>2</sub>; detector temperature: 250 °C; injector temperature: 250 °C; column temperature: 150 °C; inlet pressure = 0.08 MPa.

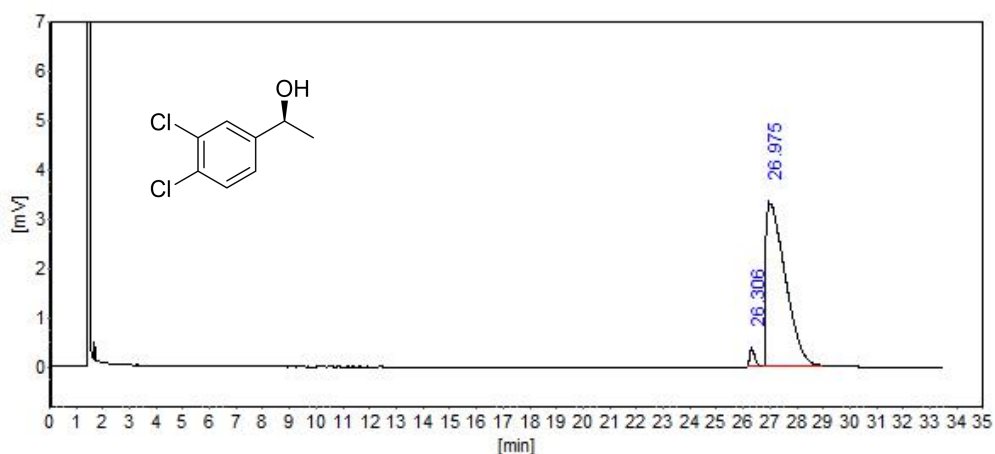

| Peak | Retention time [min] | Area[uv*s] | %Area  |
|------|----------------------|------------|--------|
| 1    | 26.306               | 4539       | 2.646  |
| 2    | 26.975               | 166980     | 97.354 |

**(±)-1-(2,4-dichlorophenyl)ethan-1-ol:** The racemate was determined by GC equipped with a chiral β-DEX™120 (df = 0.25μm, 0.25 mm i.d.×30 m, fused silica capillary column); carrier gas: H<sub>2</sub>; detector temperature: 250 °C; injector temperature: 250 °C; column temperature: 150 °C; inlet pressure = 0.08 MPa.

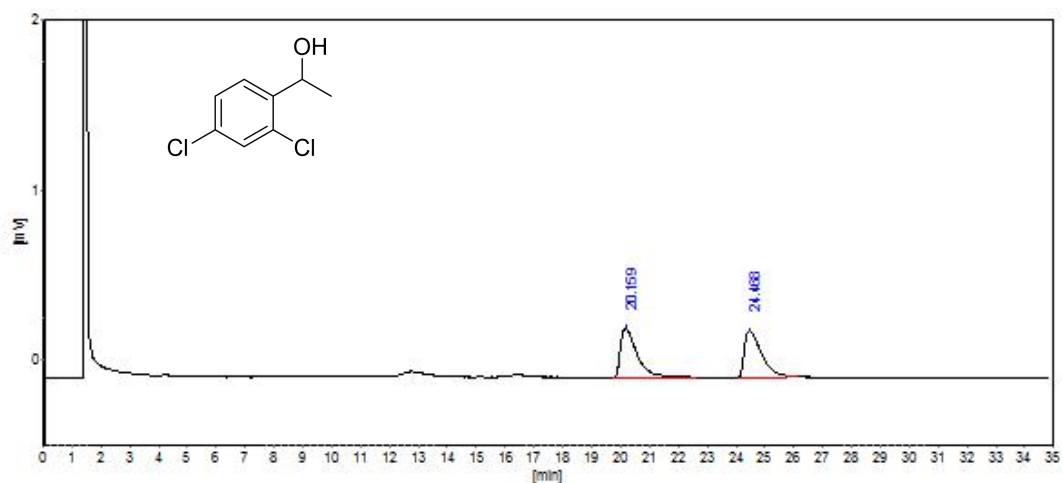

**(S)-1-(2,4-dichlorophenyl)ethan-1-ol (P17):** 97.4 % ee (S). The enantiomeric excess was determined by GC equipped with a chiral β-DEX™120 (df = 0.25μm, 0.25 mm i.d.×30 m, fused silica capillary column); carrier gas: H<sub>2</sub>; detector temperature: 250 °C; injector temperature: 250 °C; column temperature: 150 °C; inlet pressure = 0.08 MPa.

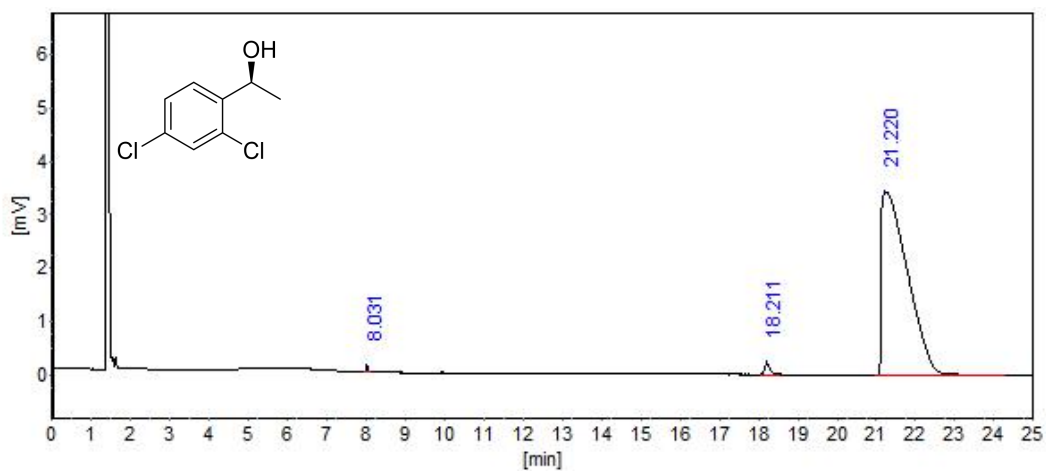

| Peak | Retention time [min] | Area [uv*s] | Area [%] |
|------|----------------------|-------------|----------|
| 2    | 18.211               | 2133        | 1.322    |
| 3    | 21.220               | 159208      | 98.678   |

**(±)-1-(3,4-dimethoxyphenyl)ethan-1-ol:** The racemate was determined by GC equipped with a chiral β-DEX™120 (df = 0.25µm, 0.25 mm i.d.×30 m, fused silica capillary column); carrier gas: H<sub>2</sub>; detector temperature: 250 °C; injector temperature: 250 °C; column temperature: 130 °C; inlet pressure = 0.1 MPa.

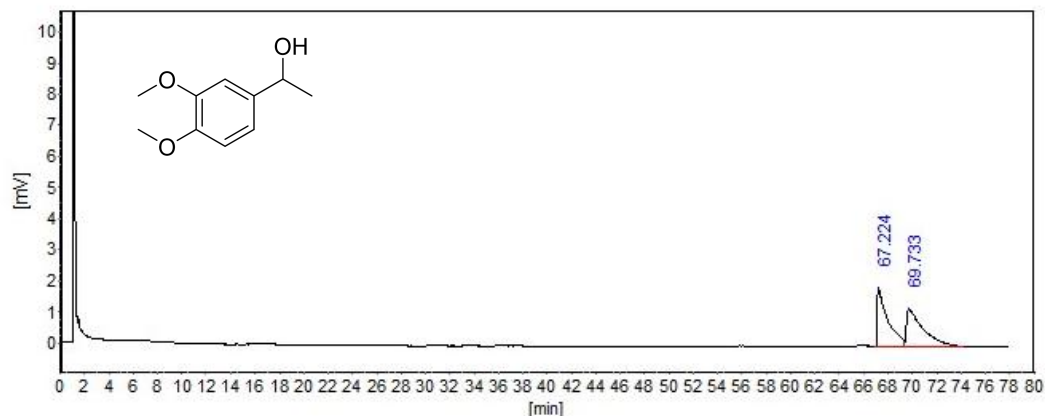

**(S)-1-(3,4-dimethoxyphenyl)ethan-1-ol (P18):** 97.6 % ee (S). The enantiomeric excess was determined by GC equipped with a chiral β-DEX™120 (df = 0.25µm, 0.25 mm i.d.×30 m, fused silica capillary column); carrier gas: H<sub>2</sub>; detector temperature: 250 °C; injector temperature: 250 °C; column temperature: 130 °C; inlet pressure = 0.1 MPa.

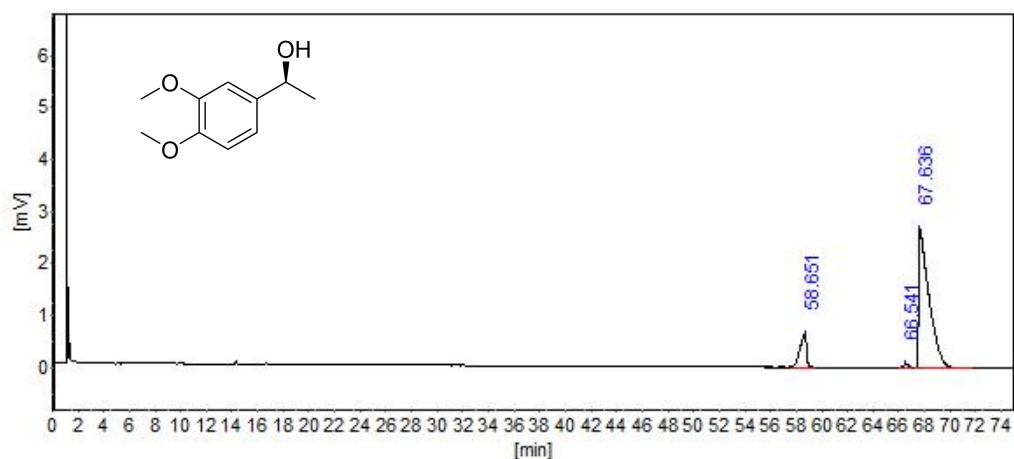

| Peak | Retention time [min] | Area [uv*s] | Area [%] |
|------|----------------------|-------------|----------|
| 2    | 66.541               | 1815        | 1.193    |
| 3    | 67.636               | 150301      | 98.807   |

**(±)-1-(3,5-bis(trifluoromethyl)phenyl)ethan-1-ol:** The racemate was determined by GC equipped with a chiral β-DEX™120 (df = 0.25µm, 0.25 mm i.d.×30 m, fused silica capillary column); carrier gas: H<sub>2</sub>; detector temperature: 250 °C; injector temperature: 250 °C; column temperature: 115 °C; inlet pressure = 0.06 MPa.

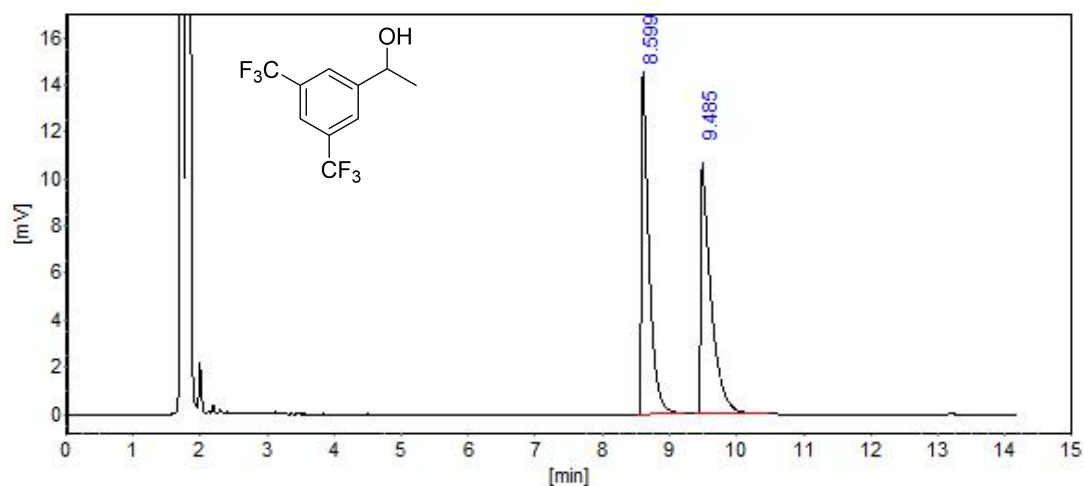

**(S)-1-(3,5-bis(trifluoromethyl)phenyl)ethan-1-ol (P19):** 98.2 % ee (S). The enantiomeric excess was determined by GC equipped with a chiral β-DEX™120 (df = 0.25µm, 0.25 mm i.d.×30 m, fused silica capillary column); carrier gas: H<sub>2</sub>; detector temperature: 250 °C; injector temperature: 250 °C; column temperature: 115 °C; inlet pressure = 0.06 MPa.

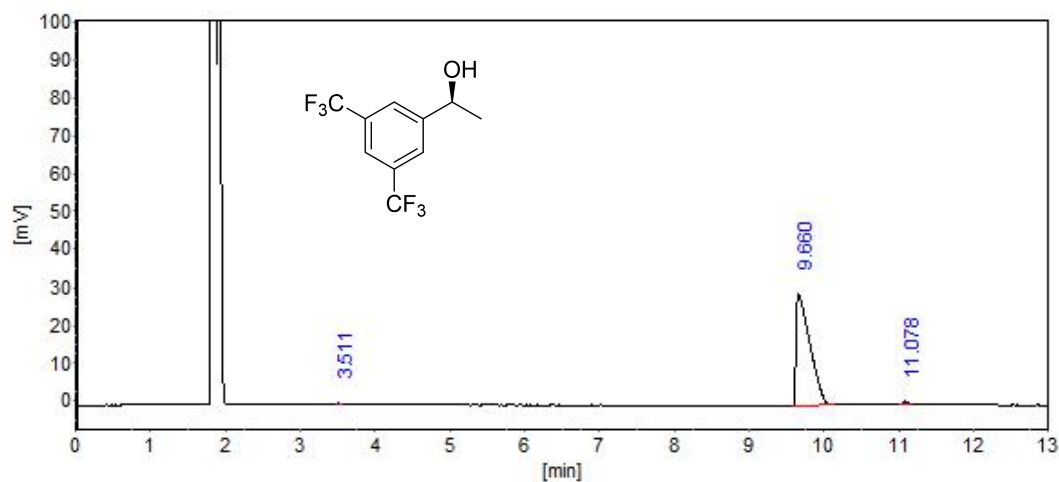

| Peak | Retention time [min] | Area [uv*s] | Area [%] |
|------|----------------------|-------------|----------|
| 2    | 9.660                | 372647      | 99.072   |
| 3    | 11.078               | 3490        | 0.928    |

**(±)-1-(Thiophen-2-yl)ethan-1-ol:** The racemate was determined by GC equipped with a chiral  $\beta$ -DEX<sup>TM</sup>120 (df = 0.25 $\mu$ m, 0.25 mm i.d.×30 m, fused silica capillary column); carrier gas: H<sub>2</sub>; detector temperature: 250 °C; injector temperature: 250 °C; column temperature: 115 °C; inlet pressure = 0.06 MPa.

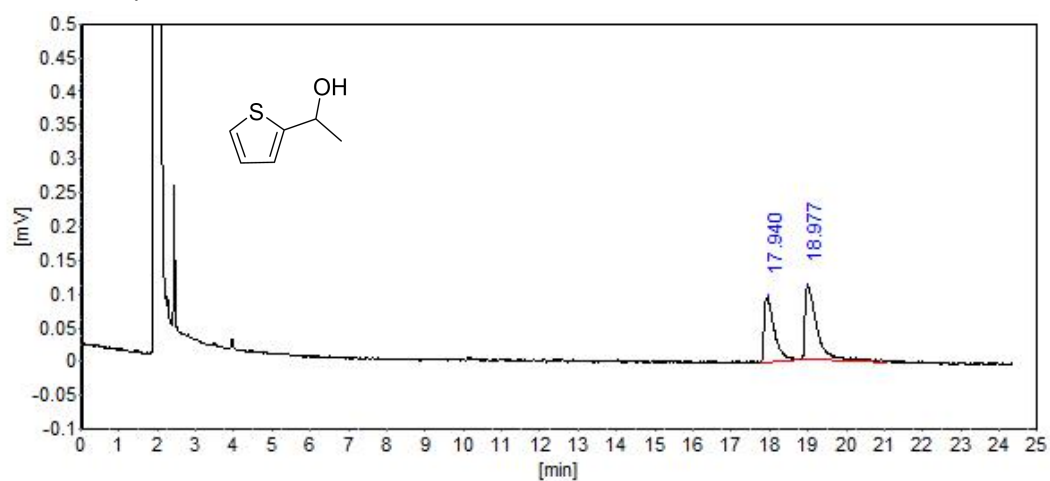

**(S)-1-(Thiophen-2-yl)ethan-1-ol (P20):** 99.6% ee (S). The enantiomeric excess was determined by GC equipped with a chiral  $\beta$ -DEX<sup>TM</sup>120 (df = 0.25 $\mu$ m, 0.25 mm i.d.×30 m, fused silica capillary column); carrier gas: H<sub>2</sub>; detector temperature: 250 °C; injector temperature: 250 °C; column temperature: 115 °C; inlet pressure = 0.06 MPa.

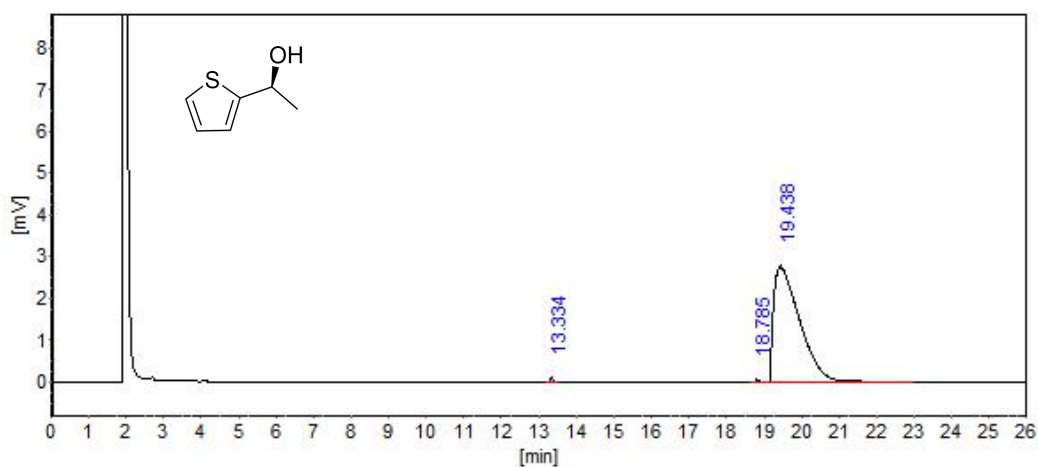

| Peak | Retention time<br>[min] | Area<br>[uv*s] | Area<br>[%] |
|------|-------------------------|----------------|-------------|
| 2    | 18.785                  | 324            | 0.240       |
| 3    | 19.438                  | 134112         | 99.760      |

**(±)-1-(5-Chlorothiophen-2-yl)-ethan-1-ol:** The racemate was determined by GC equipped with a chiral β-DEX™120 (df = 0.25µm, 0.25 mm i.d.×30 m, fused silica capillary column); carrier gas: H<sub>2</sub>; detector temperature: 250 °C; injector temperature: 250 °C; column temperature: 130 °C; inlet pressure = 0.08 MPa.

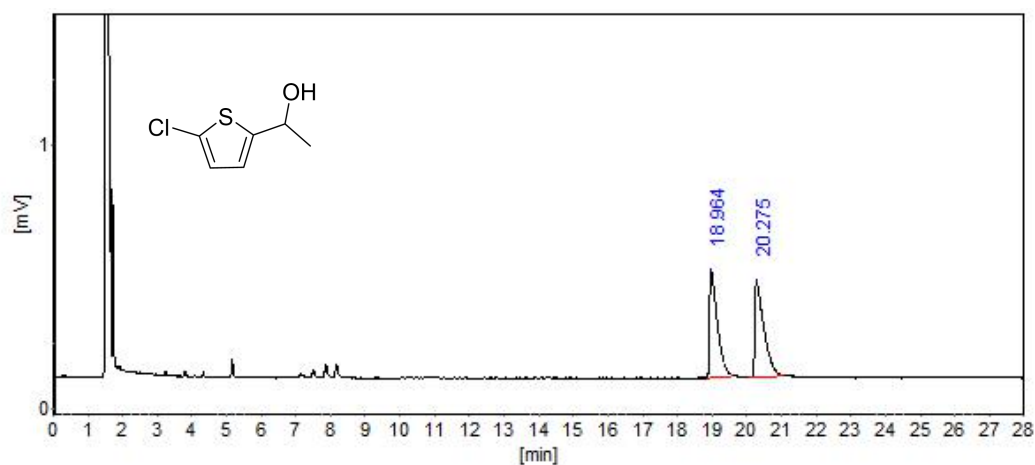

**(S)-1-(5-Chlorothiophen-2-yl)-ethan-1-ol (P21):** 97.0% ee (*S*). The enantiomeric excess was determined by GC equipped with a chiral β-DEX™120 (df = 0.25µm, 0.25 mm i.d.×30 m, fused silica capillary column); carrier gas: H<sub>2</sub>; detector temperature: 250 °C; injector temperature: 250 °C; column temperature: 130 °C; inlet pressure = 0.08 MPa.

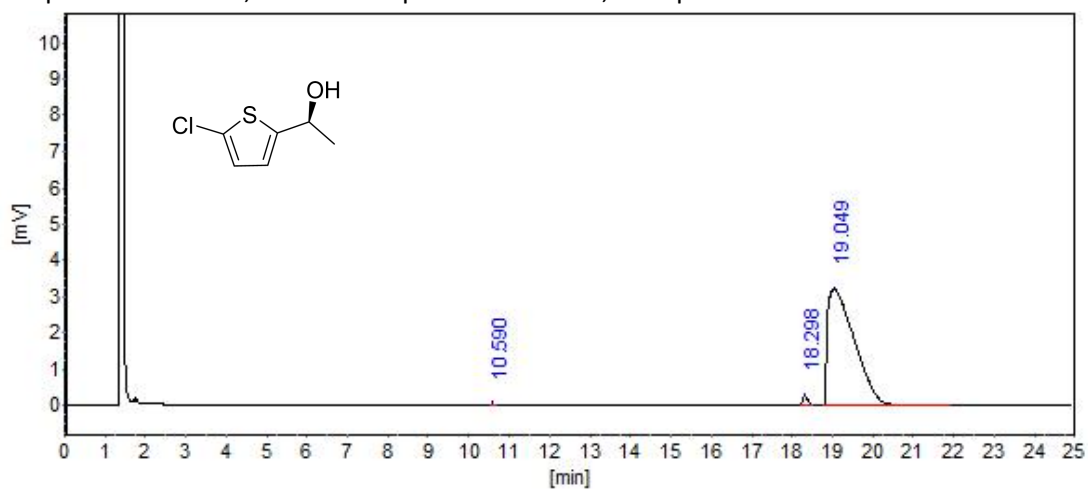

| Peak | Retention time [min] | Area [uv*s] | Area [%] |
|------|----------------------|-------------|----------|
| 2    | 18.298               | 2213        | 1.471    |
| 3    | 19.049               | 148198      | 98.529   |

**(±)-1-(5-Bromothiophen-2-yl)-ethan-1-ol:** The racemate was determined by GC equipped with a chiral β-DEX™120 (df = 0.25µm, 0.25 mm i.d.×30 m, fused silica capillary column); carrier gas: H<sub>2</sub>; detector temperature: 250 °C; injector temperature: 250 °C; column temperature: 130 °C; inlet pressure = 0.08 MPa.

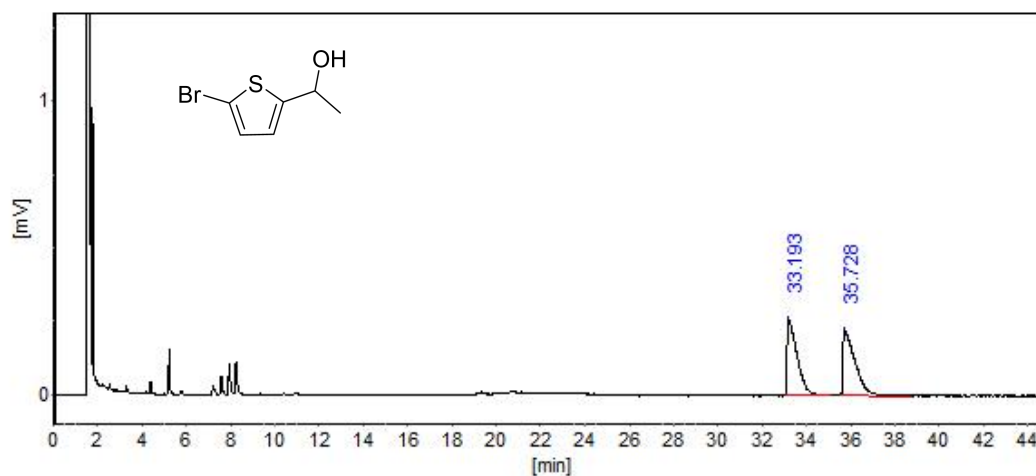

**(S)-1-(5-Bromothiophen-2-yl)-ethan-1-ol (P22):** 97.2% ee (*S*). The enantiomeric excess was determined by GC equipped with a chiral β-DEX™120 (df = 0.25µm, 0.25 mm i.d.×30 m, fused silica capillary column); carrier gas: H<sub>2</sub>; detector temperature: 250 °C; injector temperature: 250 °C; column temperature: 130 °C; inlet pressure = 0.08 MPa.

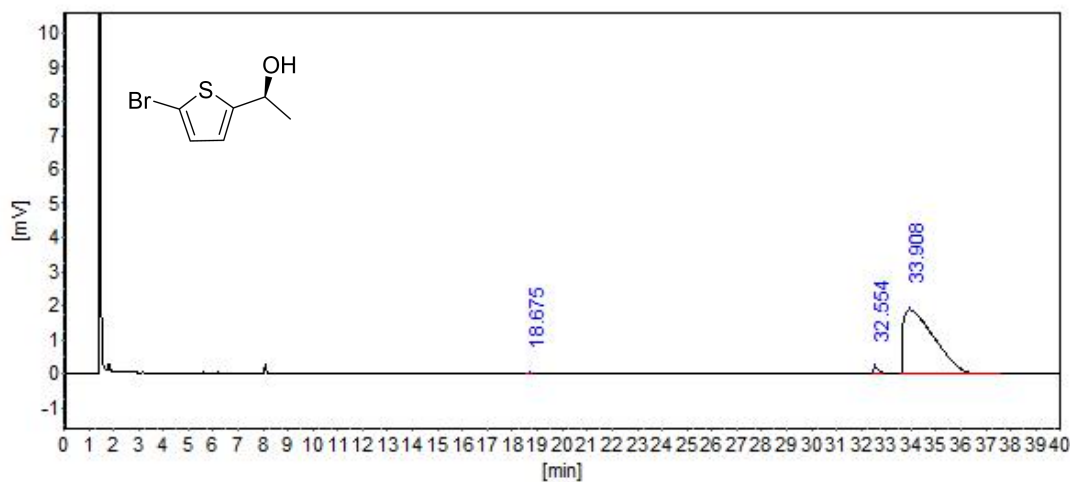

| Peak | Retention time<br>[min] | Area<br>[uv*s] | Area<br>[%] |
|------|-------------------------|----------------|-------------|
| 2    | 32.554                  | 2313           | 1.385       |
| 3    | 33.908                  | 160681         | 98.615      |

**(±)-1-(5-Methyl-thiophen-2-yl)-ethan-1-ol:** The racemate was determined by GC equipped with a chiral β-DEX™120 (df = 0.25µm, 0.25 mm i.d.×30 m, fused silica capillary column); carrier gas: H<sub>2</sub>; detector temperature: 250 °C; injector temperature: 250 °C; column temperature: 115 °C; inlet pressure = 0.06 MPa.

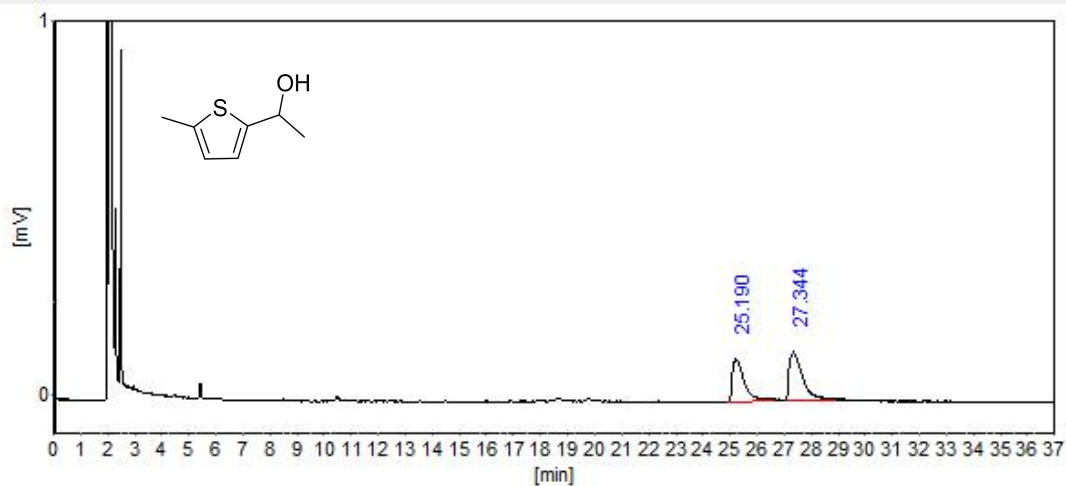

**(S)-1-(5-Methyl-thiophen-2-yl)-ethan-1-ol (P23):** 99.4% ee (S). The enantiomeric excess was determined by GC equipped with a chiral β-DEX™120 (df = 0.25µm, 0.25 mm i.d.×30 m, fused silica capillary column); carrier gas: H<sub>2</sub>; detector temperature: 250 °C; injector temperature: 250 °C; column temperature: 115 °C; inlet pressure = 0.06 MPa.

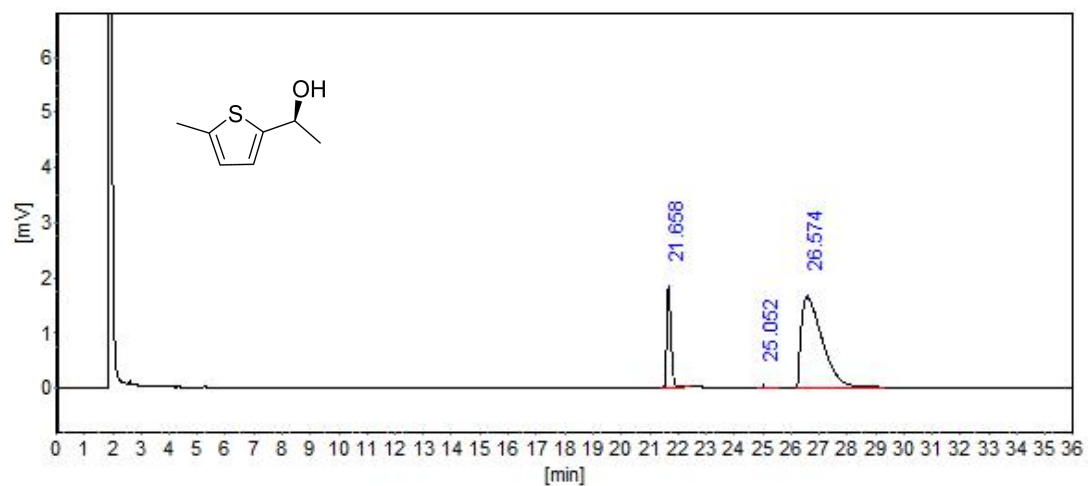

| Peak | Retention time<br>[min] | Area<br>[uv*s] | Area<br>[%] |
|------|-------------------------|----------------|-------------|
| 2    | 25.052                  | 289            | 0.336       |
| 3    | 26.574                  | 85575          | 99.664      |



**(±)-1-(3-Chlorothiophen-2-yl)-ethan-1-ol:** The racemate was determined by GC equipped with a chiral β-DEX™120 (df = 0.25μm, 0.25 mm i.d.×30 m, fused silica capillary column); carrier gas: H<sub>2</sub>; detector temperature: 250 °C; injector temperature: 250 °C; column temperature: 130 °C; inlet pressure = 0.08 MPa.

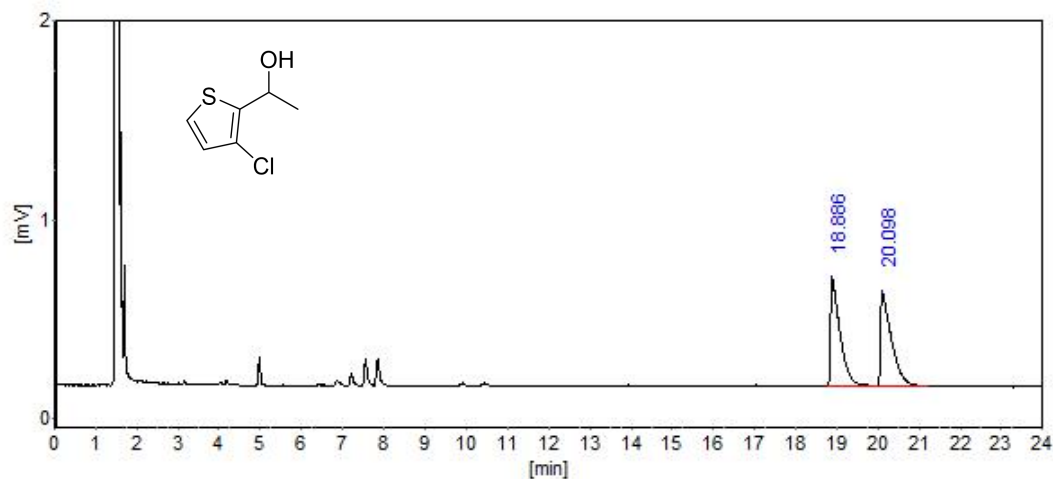

**(S)-1-(3-Chlorothiophen-2-yl)-ethan-1-ol (P24):** 99.7% ee (*S*). The enantiomeric excess was determined by GC equipped with a chiral β-DEX™120 (df = 0.25μm, 0.25 mm i.d.×30 m, fused silica capillary column); carrier gas: H<sub>2</sub>; detector temperature: 250 °C; injector temperature: 250 °C; column temperature: 130 °C; inlet pressure = 0.08 MPa.

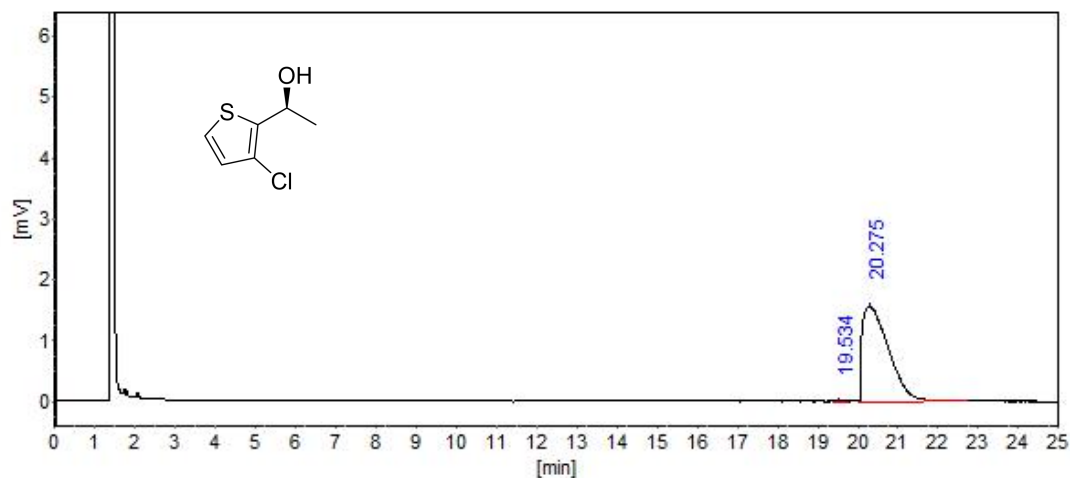

| Peak | Retention time [min] | Area [uv*s] | Area [%] |
|------|----------------------|-------------|----------|
| 1    | 19.534               | 93          | 0.132    |
| 2    | 20.275               | 70389       | 99.868   |

**(±)-1-(Thiophen-2-yl)propan-1-ol:** The racemate was determined by GC equipped with a chiral β-DEX™120 (df = 0.25µm, 0.25 mm i.d.×30 m, fused silica capillary column); carrier gas: H<sub>2</sub>; detector temperature: 250 °C; injector temperature: 250 °C; column temperature: 115 °C; inlet pressure = 0.06 MPa.

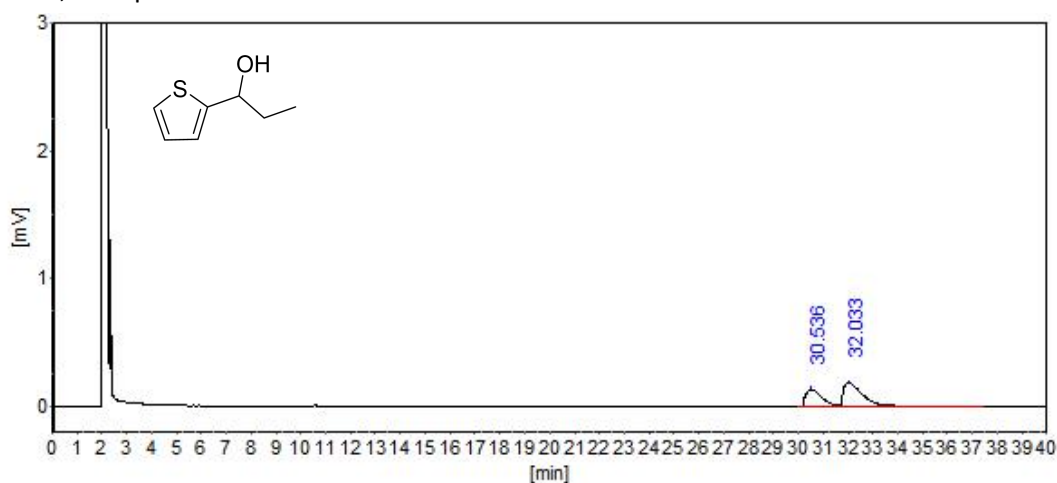

**(S)-1-(Thiophen-2-yl)propan-1-ol (P25):** 99.0% ee (S). The enantiomeric excess were determined by GC equipped with a chiral β-DEX™120 (df = 0.25µm, 0.25 mm i.d.×30 m, fused silica capillary column); carrier gas: H<sub>2</sub>; detector temperature: 250 °C; injector temperature: 250 °C; column temperature: 115 °C; inlet pressure = 0.06 MPa.

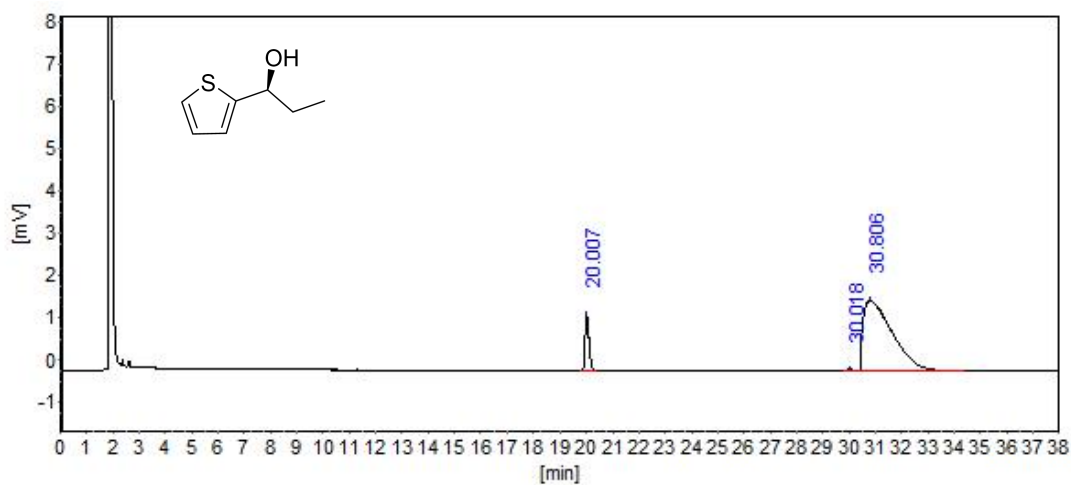

| Peak | Retention time<br>[min] | Area<br>[uv*s] | Area<br>[%] |
|------|-------------------------|----------------|-------------|
| 2    | 30.018                  | 686            | 0.527       |
| 3    | 30.806                  | 129506         | 99.473      |

**(±)-1-(Thiophen-2-yl)-butan-1-ol:** The enantiomeric excess was determined by HPLC on Chiralcel OD-H column, hexane: isopropanol = 99:1; flow rate = 0.3 mL/min; UV detection at 254 nm.

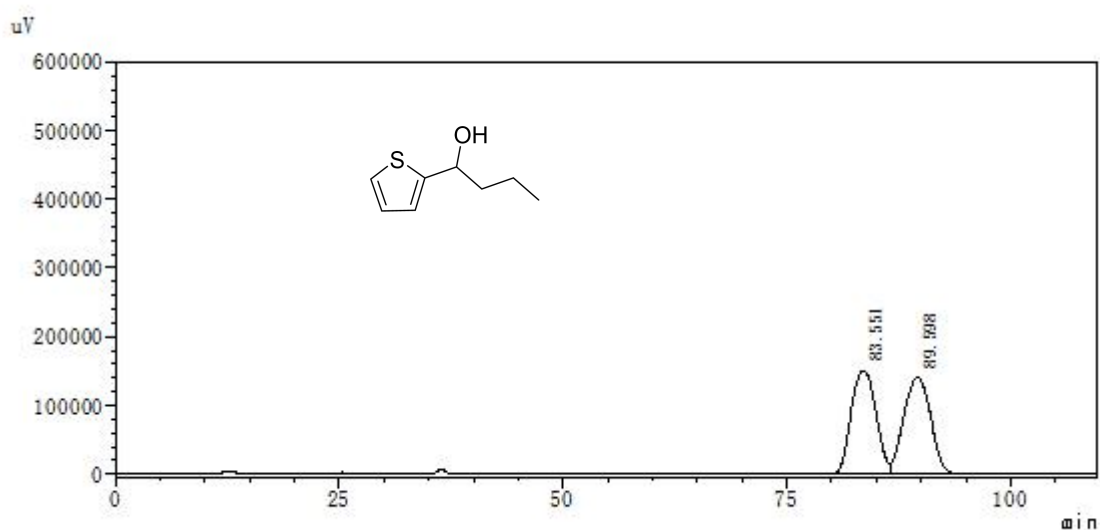

**(S)-1-(Thiophen-2-yl)-butan-1-ol (P26):** 97.5% ee (*S*). The enantiomeric excess was determined by HPLC on Chiralcel OD-H column, hexane: isopropanol = 99:1; flow rate = 0.3 mL/min; UV detection at 254 nm.

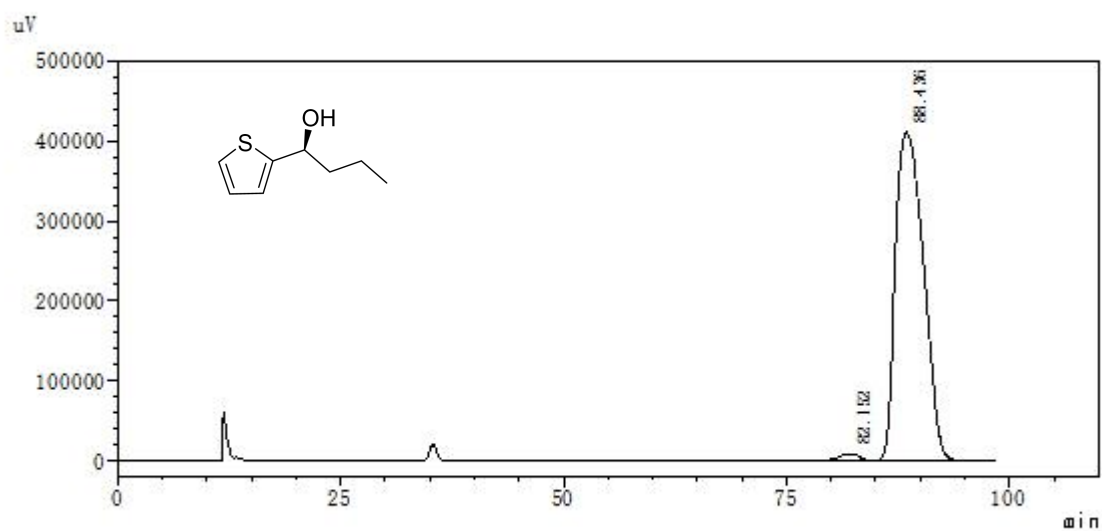

| Peak | Retention time [min] | Peak Area [mAU*s] | Peak Area [%] |
|------|----------------------|-------------------|---------------|
| 1    | 82.152               | 1373378           | 1.251         |
| 2    | 88.436               | 89894360          | 98.749        |

**(±)-1-(Furan-2-yl)-ethan-1-ol**: The racemate was determined by GC equipped with a chiral β-DEX™120 (df = 0.25µm, 0.25 mm i.d.×30 m, fused silica capillary column); carrier gas: H<sub>2</sub>; detector temperature: 250 °C; injector temperature: 250 °C; column temperature: 75 °C; inlet pressure = 0.06 MPa.

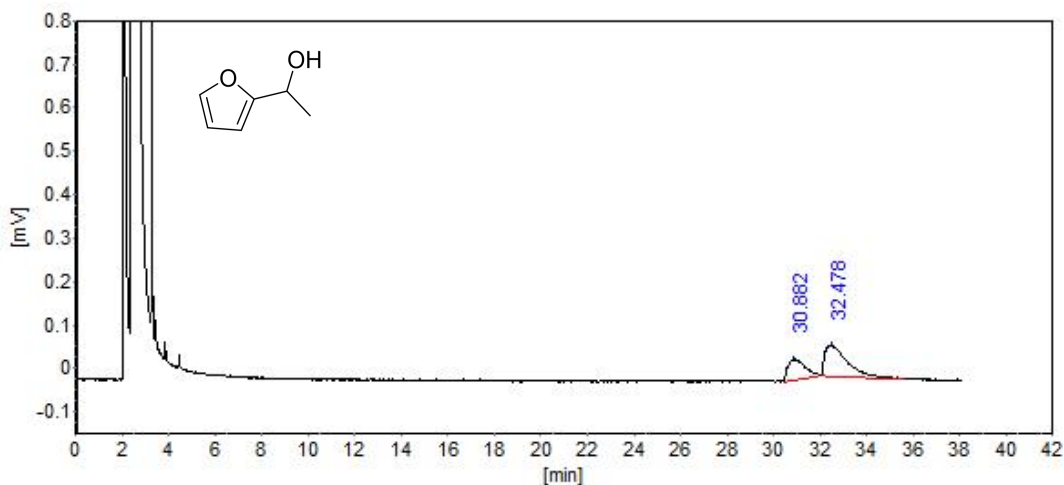

**(S)-1-(Furan-2-yl)-ethan-1-ol (P27)**: 99.6% ee (S). The enantiomeric excess was determined by GC equipped with a chiral β-DEX™120 (df = 0.25µm, 0.25 mm i.d.×30 m, fused silica capillary column); carrier gas: H<sub>2</sub>; detector temperature: 250 °C; injector temperature: 250 °C; column temperature: 75 °C; inlet pressure = 0.06 MPa.

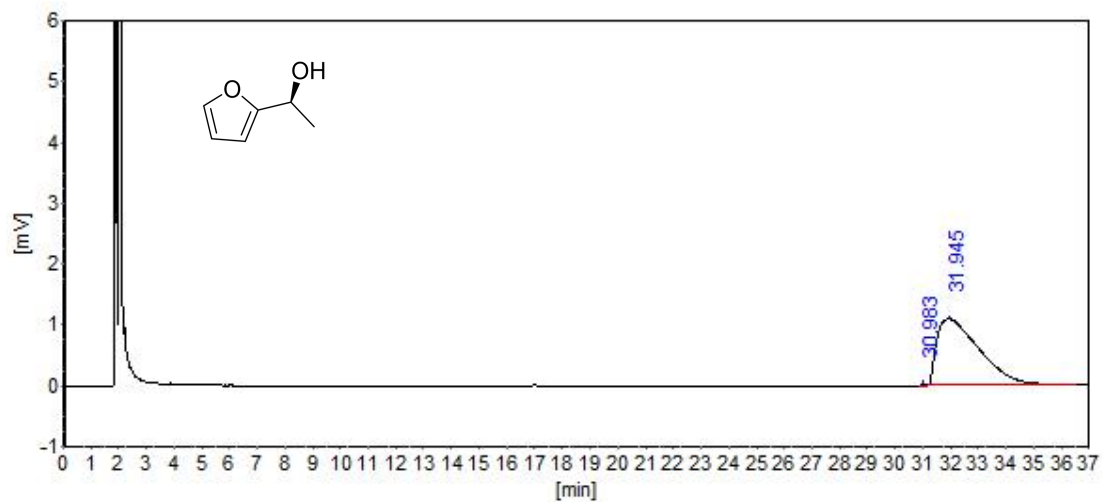

| Peak | Retention time [min] | Area [uv*s] | Area [%] |
|------|----------------------|-------------|----------|
| 1    | 30.983               | 263         | 0.225    |
| 2    | 31.945               | 116723      | 99.775   |

**(±)-1-(5-methylfuran-2-yl)ethan-1-ol:** The racemate was determined by GC equipped with a chiral β-DEX™120 (df = 0.25µm, 0.25 mm i.d.×30 m, fused silica capillary column); carrier gas: H<sub>2</sub>; detector temperature: 250 °C; injector temperature: 250 °C; column temperature: 80 °C; inlet pressure = 0.06 MPa.

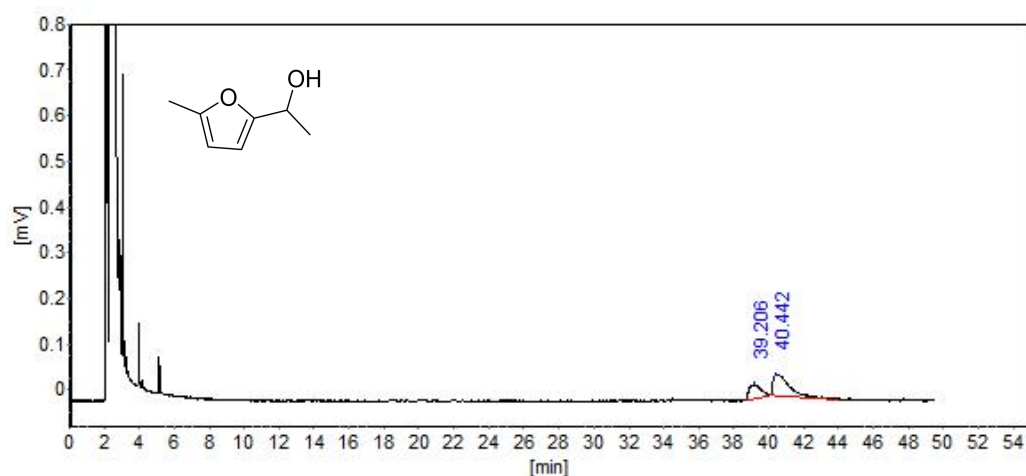

**(S)-1-(5-methylfuran-2-yl)ethan-1-ol (P28):** 98.8% ee (S). The enantiomeric excess was determined by GC equipped with a chiral β-DEX™120 (df = 0.25µm, 0.25 mm i.d.×30 m, fused silica capillary column); carrier gas: H<sub>2</sub>; detector temperature: 250 °C; injector temperature: 250 °C; column temperature: 80 °C; inlet pressure = 0.06 MPa.

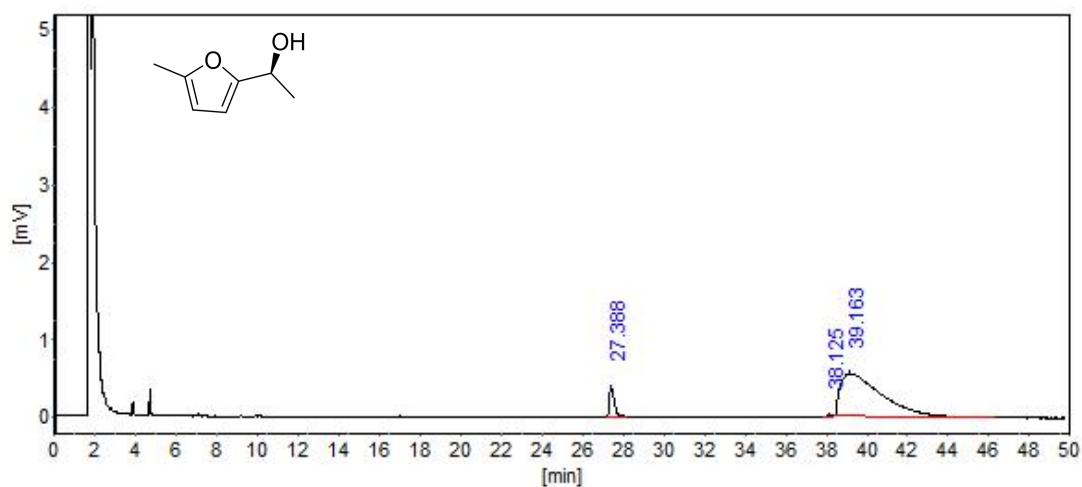

| Peak | Retention time<br>[min] | Area<br>[uv*s] | Area<br>[%] |
|------|-------------------------|----------------|-------------|
| 2    | 38.125                  | 447            | 0.575       |
| 3    | 39.163                  | 77330          | 99.425      |

**(±)-1-(5-methylfuran-2-yl)propan-1-ol:** The racemate was determined by GC equipped with a chiral β-DEX™120 (df = 0.25µm, 0.25 mm i.d.×30 m, fused silica capillary column); carrier gas: H<sub>2</sub>; detector temperature: 250 °C; injector temperature: 250 °C; column temperature: 85 °C; inlet pressure = 0.06 MPa.

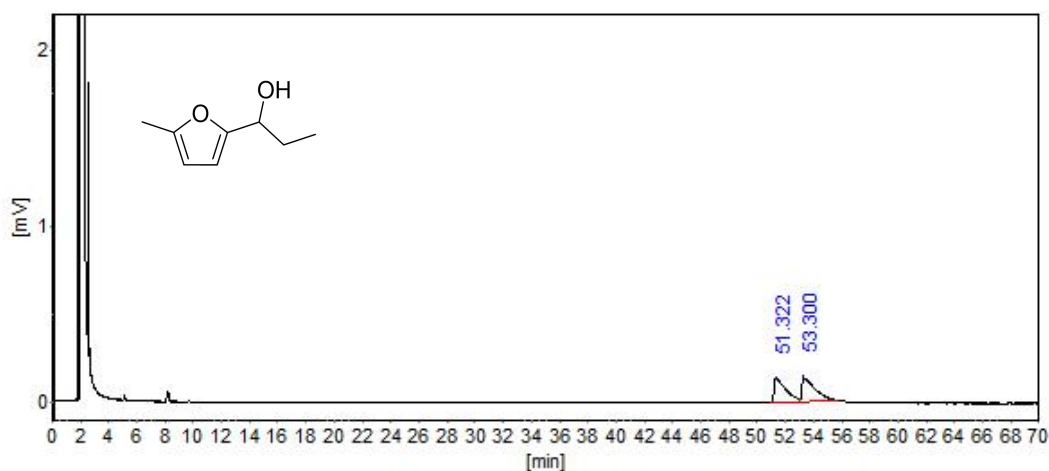

**(±)-1-(5-methylfuran-2-yl)propan-1-ol (P29):** 98.8 % ee (*S*). The enantiomeric excess was determined by GC equipped with a chiral β-DEX™120 (df = 0.25µm, 0.25 mm i.d.×30 m, fused silica capillary column); carrier gas: H<sub>2</sub>; detector temperature: 250 °C; injector temperature: 250 °C; column temperature: 85 °C; inlet pressure = 0.06 MPa.

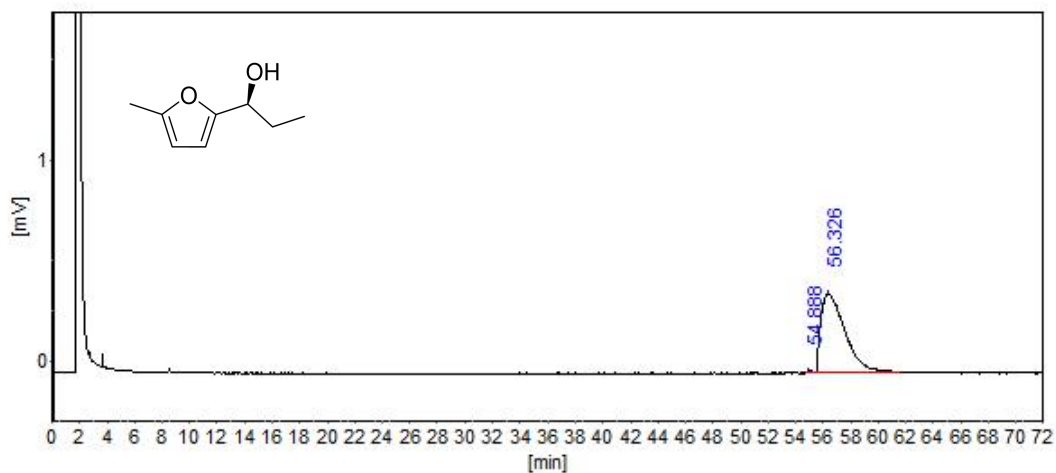

| Peak | Retention time [min] | Area [uv*s] | Area [%] |
|------|----------------------|-------------|----------|
| 1    | 54.888               | 263         | 0.554    |
| 2    | 56.326               | 47231       | 99.445   |

**(±)-1-(furan-2-yl)butan-1-ol:** The racemate was determined by GC equipped with a chiral  $\beta$ -DEX™120 (df = 0.25 $\mu$ m, 0.25 mm i.d.×30 m, fused silica capillary column); carrier gas: H<sub>2</sub>; detector temperature: 250 °C; injector temperature: 250 °C; column temperature: 105 °C; inlet pressure = 0.08 MPa.

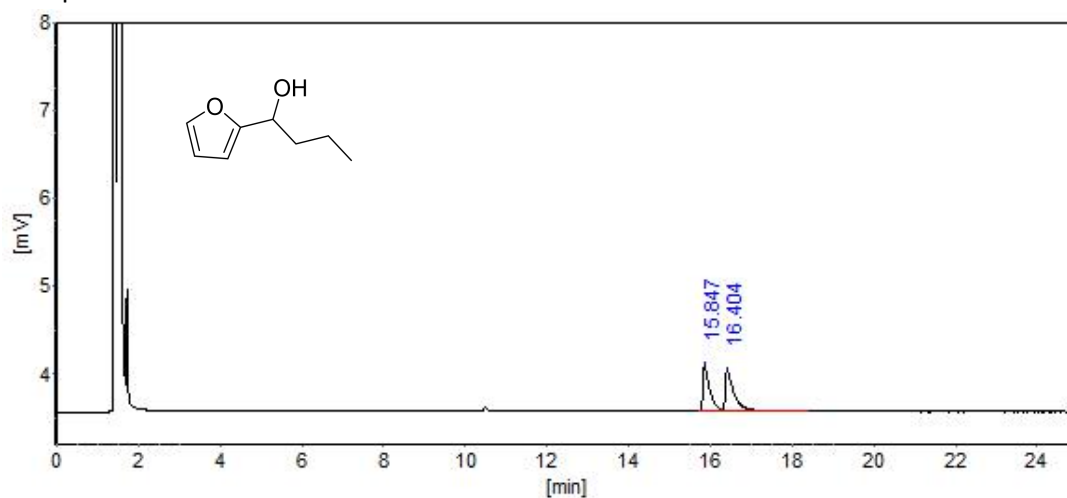

**(S)-1-(furan-2-yl)butan-1-ol (P30):** 99.9% ee (*S*). The enantiomeric excess was determined by GC equipped with a chiral  $\beta$ -DEX™120 (df = 0.25 $\mu$ m, 0.25 mm i.d.×30 m, fused silica capillary column); carrier gas: H<sub>2</sub>; detector temperature: 250 °C; injector temperature: 250 °C; column temperature: 105 °C; inlet pressure = 0.08 MPa.

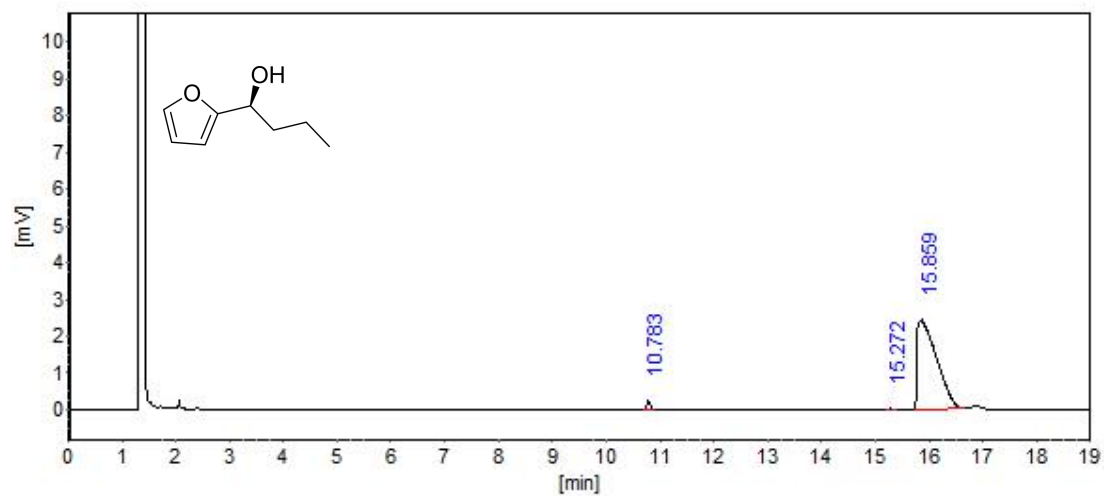

| Peak | Retention time<br>[min] | Area<br>[uv*s] | Area<br>[%] |
|------|-------------------------|----------------|-------------|
| 2    | 15.272                  | 37             | 0.061       |
| 3    | 15.859                  | 61254          | 99.939      |

**(±)-1-(Pyridin-3-yl)-ethan-1-ol:** The racemate was determined by GC equipped with a chiral β-DEX™120 (df = 0.25µm, 0.25 mm i.d.×30 m, fused silica capillary column); carrier gas: H<sub>2</sub>; detector temperature: 250 °C; injector temperature: 250 °C; column temperature: 125 °C; inlet pressure = 0.06 MPa.

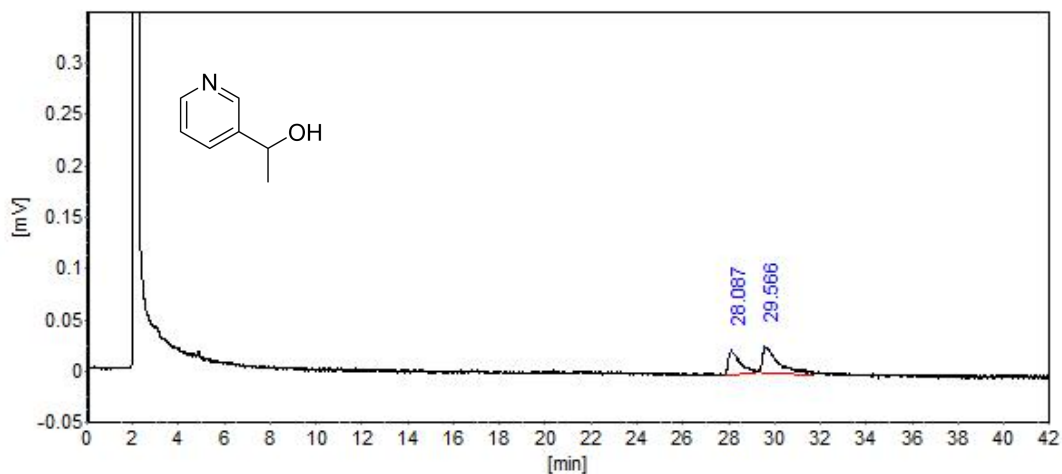

**(S)-1-(Pyridin-3-yl)-ethan-1-ol (P31):** 97.6% ee (S). The enantiomeric excess was determined by GC equipped with a chiral β-DEX™120 (df = 0.25µm, 0.25 mm i.d.×30 m, fused silica capillary column); carrier gas: H<sub>2</sub>; detector temperature: 250 °C; injector temperature: 250 °C; column temperature: 125 °C; inlet pressure = 0.06 MPa.

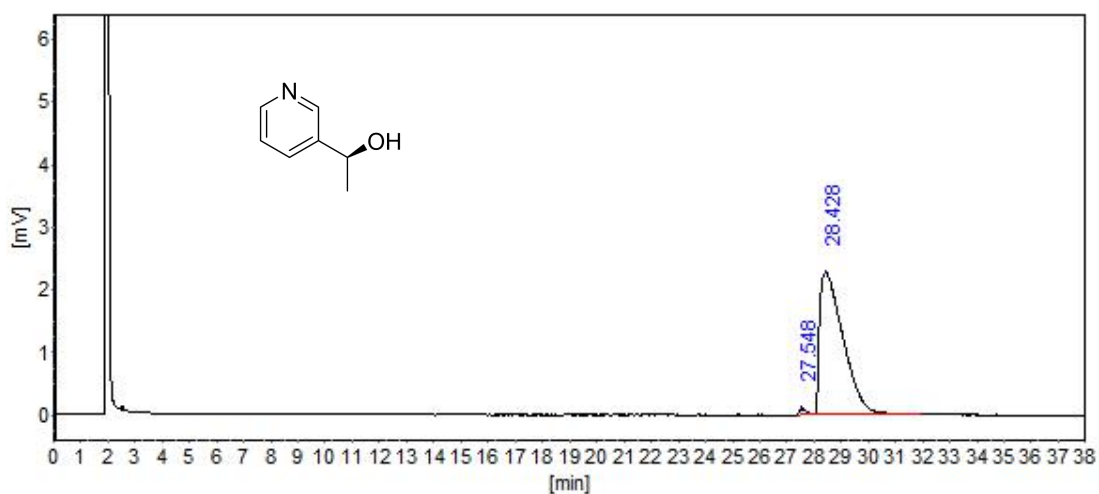

| Peak | Retention time [min] | Area [uv*s] | Area [%] |
|------|----------------------|-------------|----------|
| 1    | 27.548               | 1662        | 1.206    |
| 2    | 28.428               | 136143      | 98.794   |



**(±)-1-(Pyridin-4-yl)-ethan-1-ol:** The racemate was determined by GC equipped with a chiral β-DEX™120 (df = 0.25μm, 0.25 mm i.d.×30 m, fused silica capillary column); carrier gas: H<sub>2</sub>; detector temperature: 250 °C; injector temperature: 250 °C; column temperature: 125 °C; inlet pressure = 0.06 MPa.

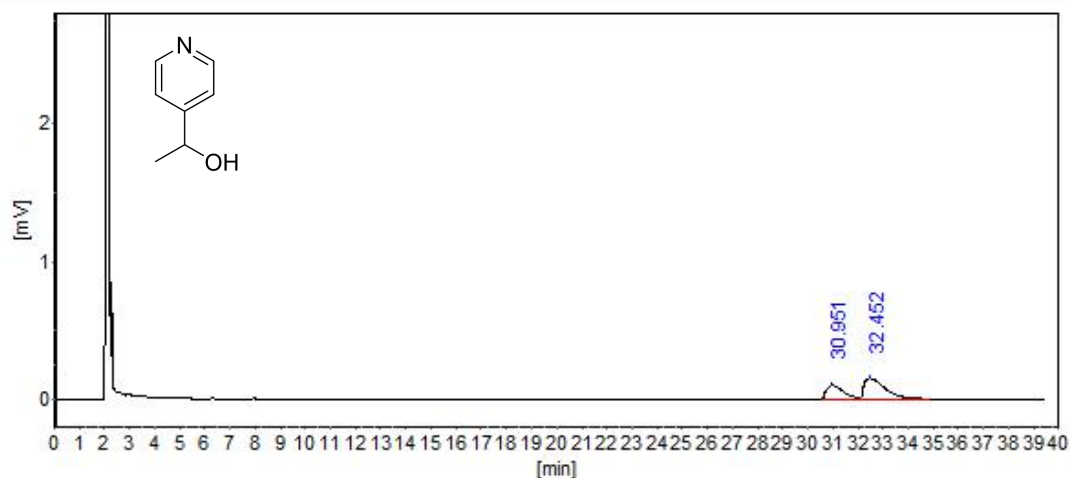

**(S)-1-(Pyridin-4-yl)-ethan-1-ol (P32):** 97.2% ee (*S*). The enantiomeric excess was determined by GC equipped with a chiral β-DEX™120 (df = 0.25μm, 0.25 mm i.d.×30 m, fused silica capillary column); carrier gas: H<sub>2</sub>; detector temperature: 250 °C; injector temperature: 250 °C; column temperature: 125 °C; inlet pressure = 0.06 MPa.

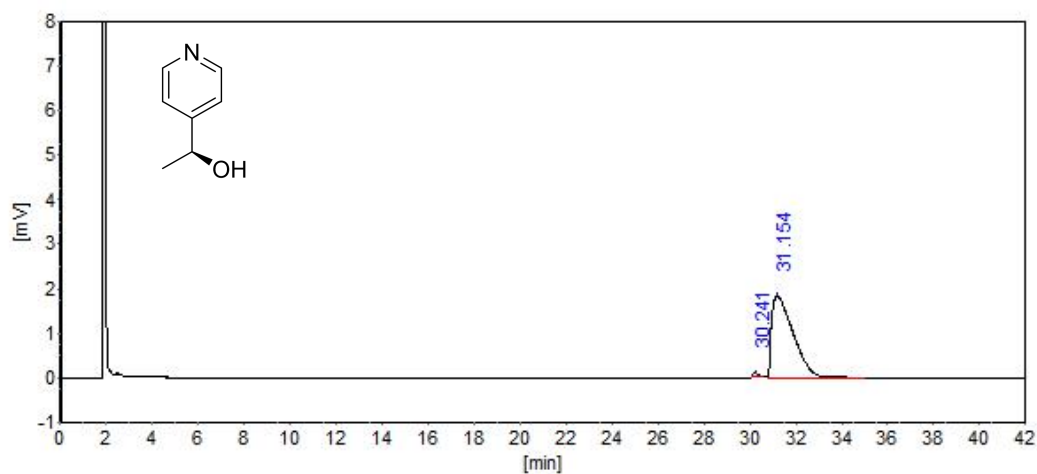

| Peak | Retention time [min] | Area [uv*s] | Area [%] |
|------|----------------------|-------------|----------|
| 1    | 30.241               | 1723        | 1.420    |
| 2    | 31.154               | 119636      | 98.580   |

**(±)-1-(2,4-dimethylthiazol-5-yl)ethan-1-ol:** The racemate was determined by GC equipped with a chiral β-DEX™120 (df = 0.25μm, 0.25 mm i.d.×30 m, fused silica capillary column); carrier gas: H<sub>2</sub>; detector temperature: 250 °C; injector temperature: 250 °C; column temperature: 130 °C; inlet pressure = 0.1 MPa.

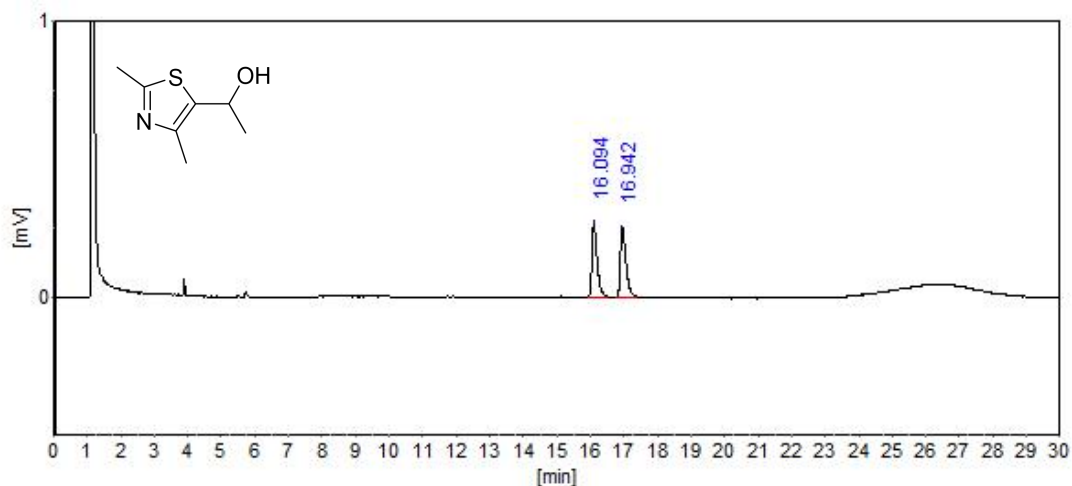

**(S)-1-(2,4-dimethylthiazol-5-yl)ethan-1-ol (P33):** 99.2 % ee (*S*). The enantiomeric excess was determined by GC equipped with a chiral β-DEX™120 (df = 0.25μm, 0.25 mm i.d.×30 m, fused silica capillary column); carrier gas: H<sub>2</sub>; detector temperature: 250 °C; injector temperature: 250 °C; column temperature: 130 °C; inlet pressure = 0.1 MPa.

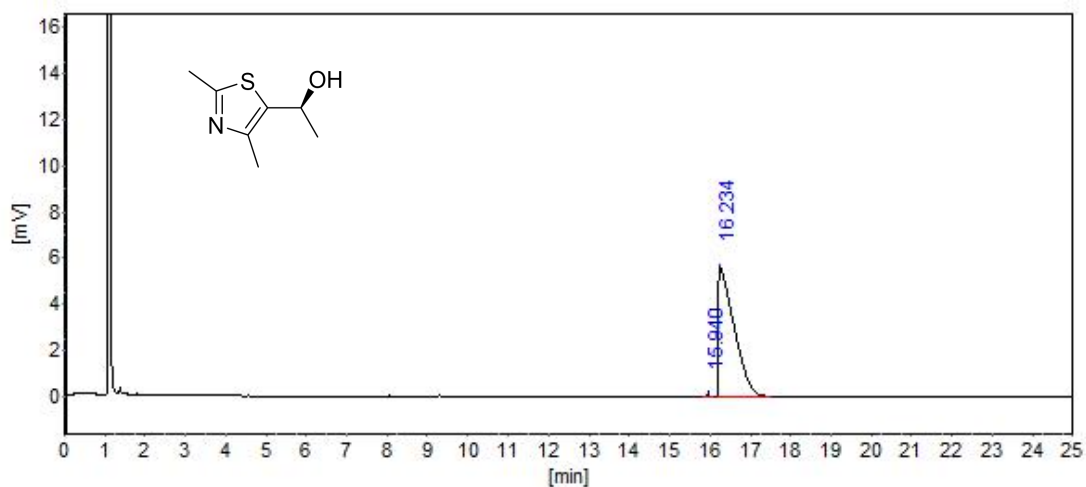

| Peak | Retention time<br>[min] | Area<br>[uv*s] | Area<br>[%] |
|------|-------------------------|----------------|-------------|
| 1    | 15.940                  | 630            | 0.418       |
| 2    | 16.234                  | 150185         | 99.582      |

**(±)-1-(naphthalen-2-yl)ethan-1-ol:** The racemate was determined by GC equipped with a chiral β-DEX™120 (df = 0.25µm, 0.25 mm i.d.×30 m, fused silica capillary column); carrier gas: H<sub>2</sub>; detector temperature: 250 °C; injector temperature: 250 °C; column temperature: 140 °C; inlet pressure = 0.08 MPa.

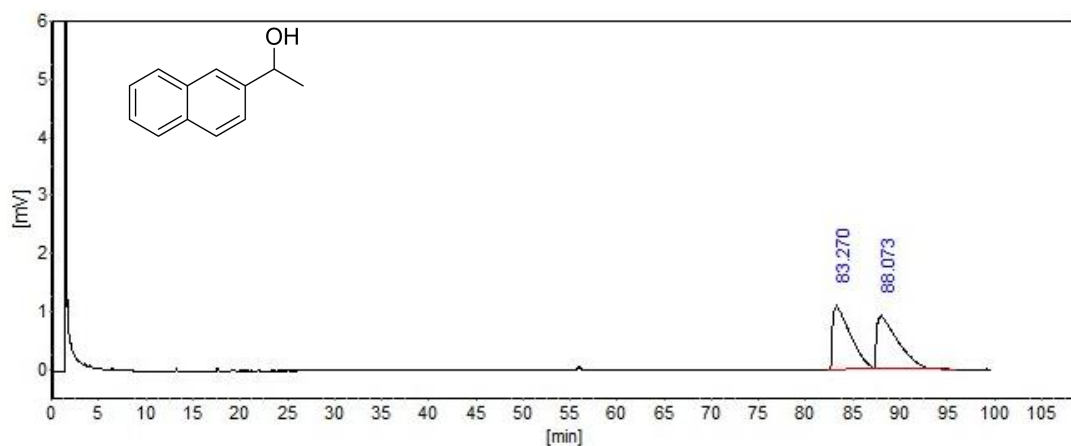

**(S)-1-(naphthalen-2-yl)ethan-1-ol (P34):** 97.4 % ee (S). The enantiomeric excess was determined by GC equipped with a chiral β-DEX™120 (df = 0.25µm, 0.25 mm i.d.×30 m, fused silica capillary column); carrier gas: H<sub>2</sub>; detector temperature: 250 °C; injector temperature: 250 °C; column temperature: 140 °C; inlet pressure = 0.08 MPa.

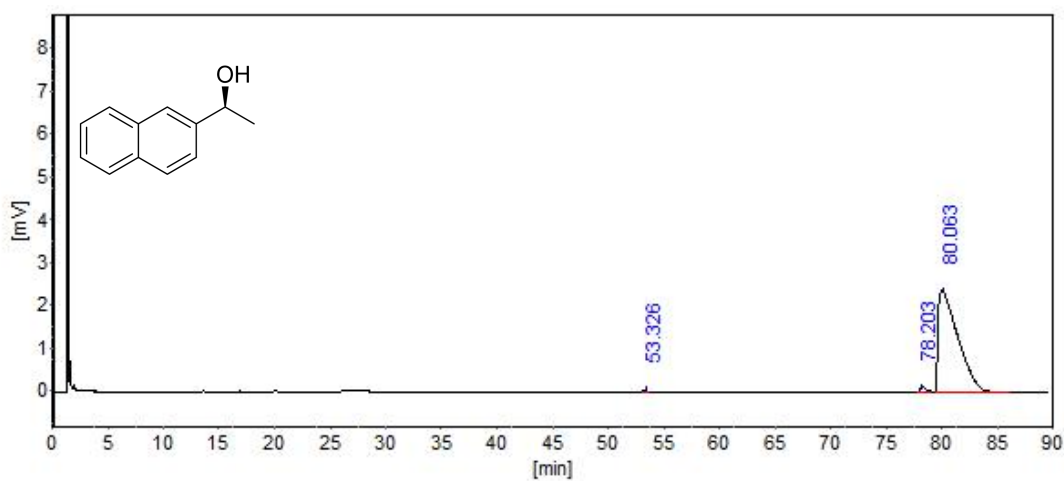

| Peak | Retention time [min] | Area [uv*s] | Area [%] |
|------|----------------------|-------------|----------|
| 2    | 78.203               | 3899        | 1.318    |
| 3    | 80.063               | 291912      | 98.682   |

**(±)-6,7,8,9-tetrahydro-5H-benzo[7]annulen-5-ol:** The racemate was determined by GC equipped with a chiral β-DEX™120 (df = 0.25μm, 0.25 mm i.d.×30 m, fused silica capillary column); carrier gas: H<sub>2</sub>; detector temperature: 250 °C; injector temperature: 250 °C; column temperature: 160 °C; inlet pressure = 0.08 MPa.

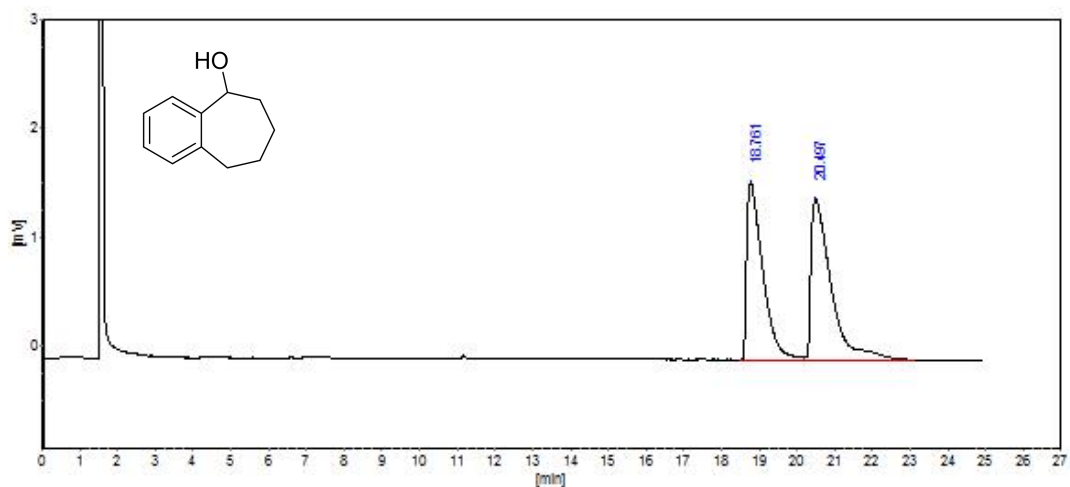

**(S)-6,7,8,9-tetrahydro-5H-benzo[7]annulen-5-ol (P35):** 99.6 % ee (S). The enantiomeric excess was determined by GC equipped with a chiral β-DEX™120 (df = 0.25μm, 0.25 mm i.d.×30 m, fused silica capillary column); carrier gas: H<sub>2</sub>; detector temperature: 250 °C; injector temperature: 250 °C; column temperature: 160 °C; inlet pressure = 0.08 MPa.

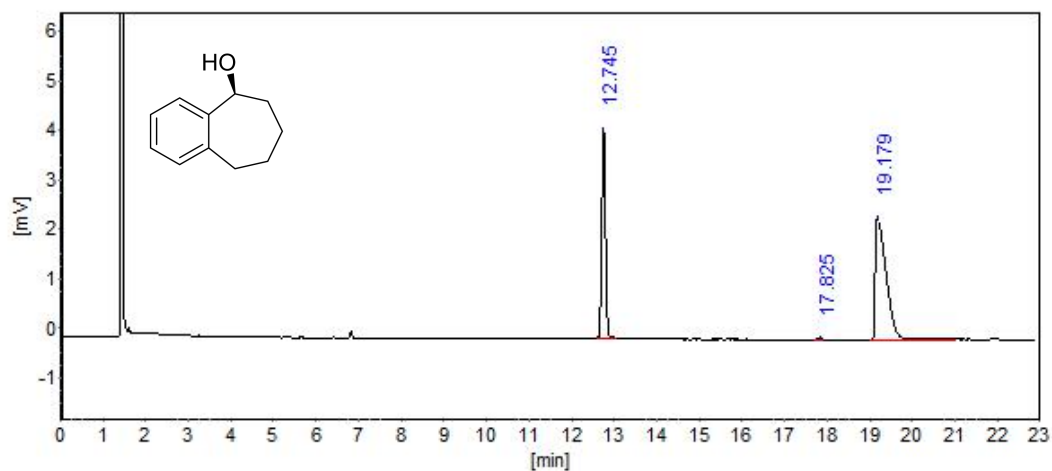

| Peak | Retention time [min] | Area [uv*s] | Area [%] |
|------|----------------------|-------------|----------|
| 2    | 17.825               | 72          | 0.162    |
| 3    | 19.179               | 44172       | 99.838   |

**(±)-4-phenylbut-3-en-2-ol:** The racemate was determined by HPLC on Chiralcel IB column, hexane: isopropanol = 90:10; flow rate = 1.0 mL/min; UV detection at 254 nm.

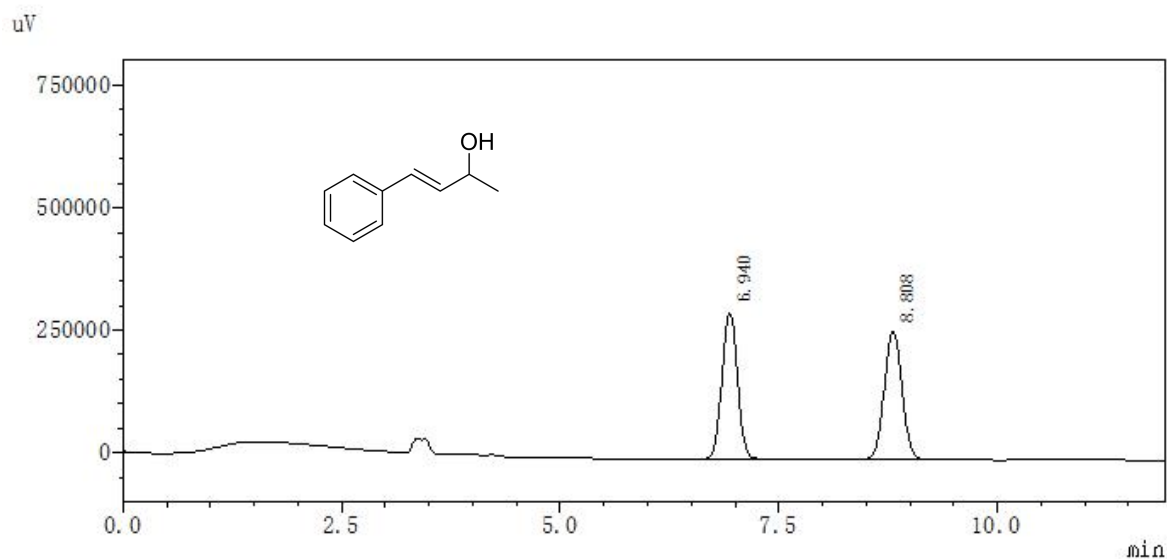

**(S)-4-phenylbut-3-en-2-ol:** 73.8% ee (S). The racemate was determined by HPLC on Chiralcel IB column, hexane: isopropanol = 90:10; flow rate = 1.0 mL/min; UV detection at 254 nm.

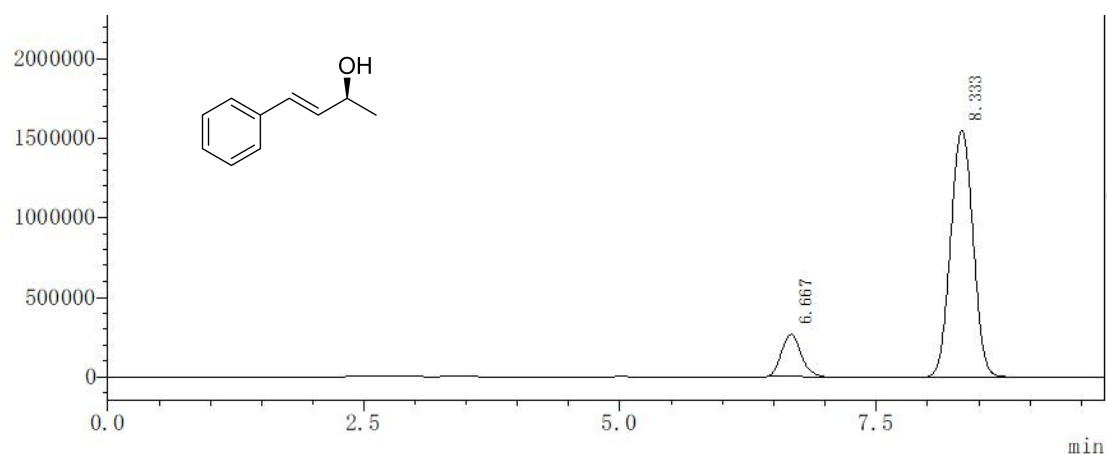

| Peak | Retention time [min] | Peak Area (mAU*s) | Peak Area (%) |
|------|----------------------|-------------------|---------------|
| 1    | 6.667                | 3575493           | 13.079        |
| 2    | 8.333                | 23762166          | 86.921        |

**(±)-1,3-diphenylprop-2-en-1-ol:** The racemate was determined by HPLC on Chiralcel OD-H column, hexane: isopropanol = 90:10; flow rate = 1.0 mL/min; UV detection at 254 nm.

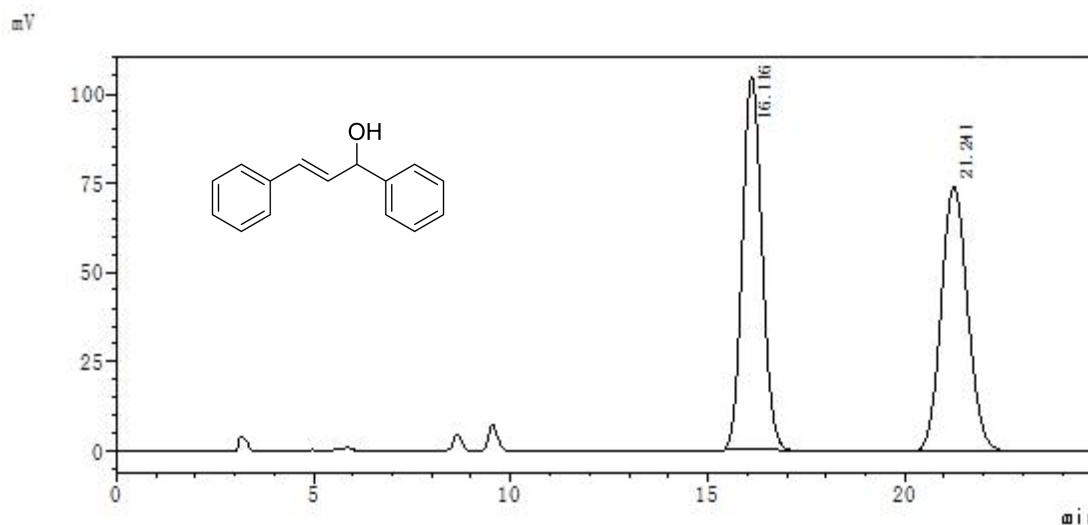

**(S)-1,3-diphenylprop-2-en-1-ol:** 78.3% ee (*S*). The racemate was determined by HPLC on Chiralcel OD-H column, hexane: isopropanol = 90:10; flow rate = 1.0 mL/min; UV detection at 254 nm.

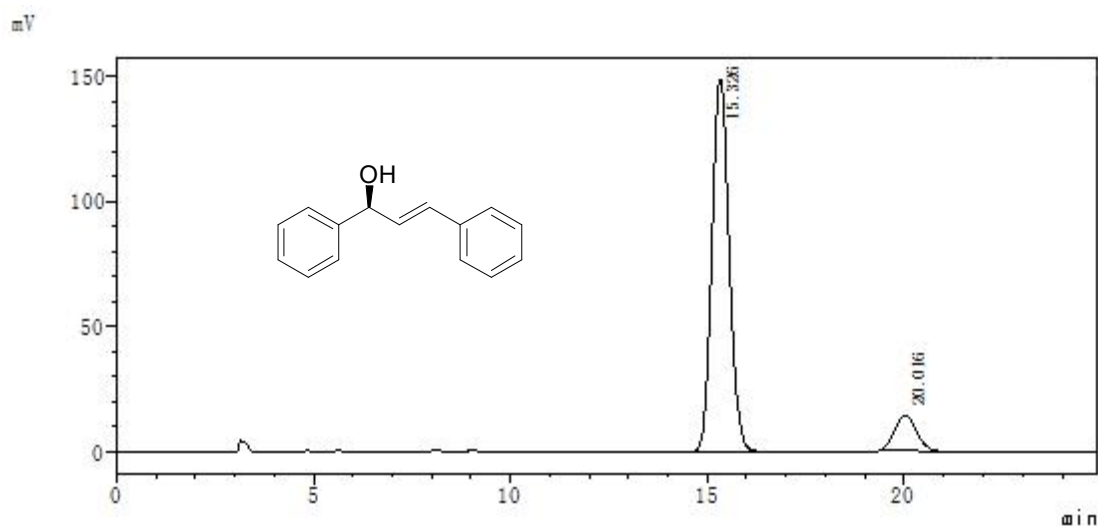

| Peak | Retention Time [min] | Peak Area (mAU*s) | Peak Area (%) |
|------|----------------------|-------------------|---------------|
| 1    | 15.326               | 4513582           | 89.165        |
| 2    | 20.016               | 548454            | 10.835        |

## References

- [1] Z. Liang, T. Yang, G. Gu, L. Dang, X. Zhang, *Chinese Journal of Chemistry*, 2018, 36, 851-856.
- [2] L. Zhang, L. Zhang, Q. Chen, L. Li, J. Jiang, H. Sun, C. Zhao, Y. Yang, C. Li, *Org. Lett.* 2022, 24, 415-419.
- [3] J. B. Xie, J. H. Xie, X. L. Liu, Q. Q. Zhang, Q. L. Zhou. *Chem. Asian J.* 2011, 6, 899 - 908.
- [4] S. Liu, H. Liu, H. Zhou, Q. Liu, J. Lv, *Org. Lett.* 2018, 20, 1110-1113.
- [5] K. T.sriwong, A. A. Koesoema, T. Matsuda, *RSC Adv.*, 2020,10, 30953-30960.
- [6] Y. Li, Y. Zhou, Q. Shi, K. Ding, R. Noyori, C. A. Sandoval, *Advanced Synthesis and Catalysis*, 2011, 353, 495 - 500.
- [7] A. Kišic, M. Stephan, B. Mohar, *Advanced Synthesis and Catalysis* 2015, 357, 2540-2546.
- [8] C. Li, X. Lu, M. Wang, L. Zhang, J. Jiang, S. Yan, Y. Yang, Y. Zhao, L. Zhang, *Tetrahedron Letters* 2020, 61, 152356.
- [9] Z. Huang, Y. Wang, X. Leng, Z. Huang, *J. Am. Chem. Soc.* 2021, 143, 4824-4836.
- [10] Y. Sun, C. Lu, B. Zhao, M. Xue, *J. Org. Chem.* 2020, 85, 10504-10513.
